# Supplementary material for: Discovery of 5-Phenylpyrazolopyrimidinone Analogs as Potent Antitrypanosomal Agents with In Vivo Efficacy
Source: PubMed Central journal article supplement (PMC10424178; doi:10.1021/acs.jmedchem.3c00161), 2023-07-20
Supplement: jm3c00161_si_001.pdf [file jm3c00161_si_001.pdf]

## Supporting information

### Discovery of 5-phenylpyrazolopyrimidinone analogues as potent antitrypanosomal agents with *in vivo* efficacy

Yang Zheng<sup>a,1</sup>, Magali van den Kerkhof<sup>b,1</sup>, Tiffany van der Meer<sup>a</sup>, Sheraz Gul<sup>c,d</sup>, Maria Kuzikov<sup>c,d</sup>, Bernhard Ellinger<sup>c,d</sup>, Iwan J.P. de Esch<sup>a</sup>, Marco Siderius<sup>a</sup>, An Matheussen<sup>b</sup>, Louis Maes<sup>b</sup>, Geert Jan Sterk<sup>a</sup>, Guy Caljon<sup>b,1\*</sup> and Rob Leurs<sup>a,1\*</sup>

<sup>a</sup> Amsterdam Institute for Molecules, Medicines and Systems, Division of Medicinal Chemistry, Faculty of Science, Vrije Universiteit Amsterdam, De Boelelaan 1108, 1081 HZ Amsterdam, the Netherlands.

<sup>b</sup> Laboratory of Microbiology, Parasitology and Hygiene (LMPH), University of Antwerp, Universiteitsplein 1, 2610 Wilrijk, Belgium.

<sup>c</sup> Fraunhofer Institute for Translational Medicine and Pharmacology ITMP, 22525 Hamburg, Germany.

<sup>d</sup> Fraunhofer Cluster of Excellence for Immune-Mediated Diseases CIMD, 22525 Hamburg, Germany

<sup>1</sup> Authors contributed equally to this manuscript.

\* Corresponding authors: guy.caljon@uantwerpen.be (Guy Caljon); r.leurs@vu.nl (Rob Leurs).

#### Table of contents

|                                                                                                                               |               |
|-------------------------------------------------------------------------------------------------------------------------------|---------------|
| Figure S1. Structures of approved HAT treatments.                                                                             | Page S2       |
| Table S1. Physicochemical properties of <b>1</b> (BIPPO).                                                                     | Page S2       |
| Table S2. Phenotypic activity of close BIPPO analogues against <i>T. b. brucei</i> , <i>T. cruzi</i> and <i>L. infantum</i> . | Page S3       |
| Figure S2. Antitrypanosomal potency of <b>23</b> , <b>30</b> and <b>31</b> .                                                  | Page S4       |
| Figure S3. Anti- <i>Tbr</i> PDEB1 activity of <b>30</b> .                                                                     | Page S4       |
| Table S2. Safety profile of analogue <b>30</b> (NPD-2975) from <i>Eurofins</i> .                                              | Page S5       |
| Table S3. <i>In vitro</i> metabolic stability of <b>30</b> using mouse, rat and human S9 microsomal fractions.                | Page S6       |
| Table S4. Chemical characterization of final compounds.                                                                       | Page S7       |
| Table S5. Antitrypanosomal potency of final compounds.                                                                        | Page S8-9     |
| Figure S4-S142. LCMS, <sup>1</sup> H NMR, <sup>13</sup> C NMR and 2D NMR spectroscopy data.                                   | Page S10-S100 |

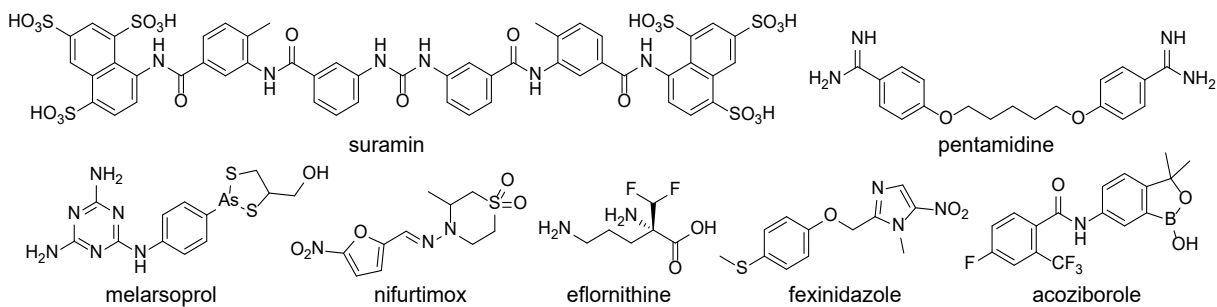

Figure S1. Structures of approved HAT treatments.

Table S1. Physicochemical properties of **1** (BIPPO).

| Compound No.                  | <b>1</b> (BIPPO) |
|-------------------------------|------------------|
| PPB-Mouse                     | 88.6%            |
| PPB-Human                     | 88.3%            |
| Solubility (mg/L) @pH 2.2     | 51               |
| Solubility (mg/L) @pH 4.5     | 50               |
| Solubility (mg/L) @pH 6.8     | 47               |
| $t_{0.5}$ -Mouse (min)        | 29               |
| Clint (microL/min/mg protein) | 48               |
| $t_{0.5}$ -Human (min)        | >130             |
| Clint (microL/min/mg protein) | <5.3             |

Table S2. Phenotypic activity of close BIPPO analogues against *T. b. brucei*, *T. cruzi* and *L. infantum*.

| Code                 | R <sup>1</sup>                                                | <i>T. b. brucei</i>            | <i>T. cruzi</i>                | <i>L. infantum</i>             | MRC-5                          |
|----------------------|---------------------------------------------------------------|--------------------------------|--------------------------------|--------------------------------|--------------------------------|
|                      |                                                               | pIC <sub>50</sub> <sup>a</sup> | pIC <sub>50</sub> <sup>a</sup> | pIC <sub>50</sub> <sup>a</sup> | pIC <sub>50</sub> <sup>a</sup> |
| <b>1</b> (BIPPO)     | Bn                                                            | 4.5 ± 0.2                      | < 4.2                          | < 4.2                          | < 4.2                          |
| <b>9</b> (NPD-2960)  | 4-PyCH <sub>2</sub>                                           | < 4.2                          | < 4.2                          | < 4.2                          | < 4.2                          |
| <b>10</b> (NPD-0434) | C <sub>6</sub> H <sub>5</sub> OCH <sub>2</sub>                | < 4.2                          | < 4.2                          | < 4.2                          | < 4.2                          |
| <b>11</b> (NPD-3281) | C <sub>6</sub> H <sub>5</sub> (CH <sub>2</sub> ) <sub>2</sub> | < 4.2                          | < 4.2                          | < 4.2                          | < 4.2                          |
| <b>12</b> (NPD-3380) | Me                                                            | < 4.2                          | < 4.2                          | < 4.2                          | < 4.2                          |
| <b>13</b> (NPD-3645) | <sup>t</sup> Bu                                               | 5.0 ± 0.0                      | < 4.2                          | < 4.2                          | < 4.2                          |
| <b>14</b> (NPD-3379) | <sup>i</sup> Pr                                               | 4.4 ± 0.1                      | < 4.2                          | < 4.2                          | < 4.2                          |
| <b>15</b> (NPD-3200) | Ph                                                            | 6.6 ± 0.1                      | < 4.2                          | < 4.2                          | < 4.2                          |
| <b>16</b> (NPD-3488) | 4-Py                                                          | 5.7 ± 0.0                      | < 4.2                          | < 4.2                          | < 4.2                          |
| <b>17</b> (NPD-2973) | 4-thiazole                                                    | 4.9 ± 0.0                      | < 4.2                          | < 4.2                          | < 4.2                          |

<sup>a</sup> Mean values of at least two independent experiments.

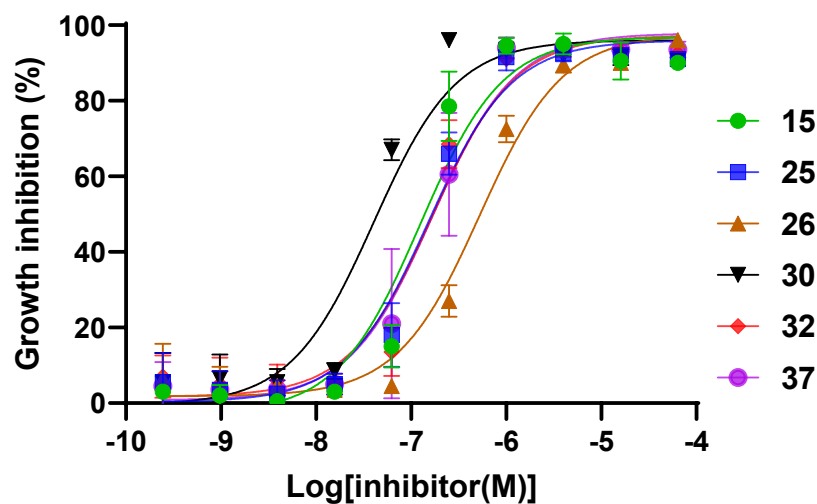

Figure S2. Antitrypanosomal potency of **15**, **25**, **26**, **30**, **32** and **37**. Representative drug susceptibility curves (mean  $\pm$  standard deviation) of **15** (green), **25** (blue), **26** (brown), **30** (black), **32** (red) and **37** (purple) against *T. brucei* with each biological replicate comprised of at least three technical replicates.

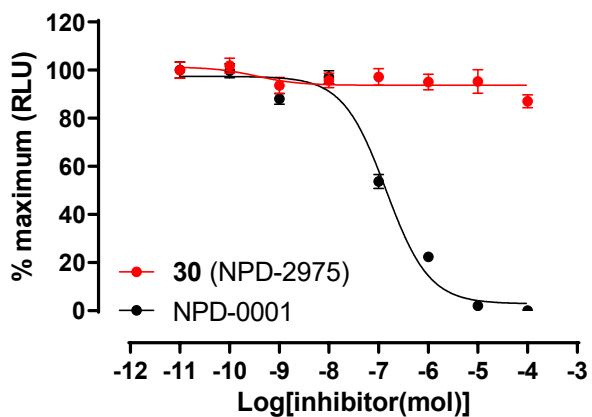

Figure S3. Anti-*Tbr*PDEB1 activity of **30**. Representative dose-response curves (mean  $\pm$  standard error of the mean) of **30** (red) for inhibition of the enzymatic activity of *Tbr*PDEB1 catalytic domain with NPD-0001 (black) as a reference compound.

Table S3. Safety profile of analogue **30** (NPD-2975) from *Eurofins*.

| DiscoverX Gene Symbol | Assay Mode | NPD-2975    |             |         |
|-----------------------|------------|-------------|-------------|---------|
|                       |            | 10 µM       |             |         |
|                       |            | % Response  |             |         |
|                       |            | Replicate 1 | Replicate 2 | Average |
| <b>GPCRs</b>          |            |             |             |         |
| ADORA2A               | Agonist    | 0.0         | 1.7         | 0.9     |
| ADORA2A               | Antagonist | 15.7        | 19.2        | 17.4    |
| ADRA1A                | Agonist    | 1.2         | 1.6         | 1.4     |
| ADRA1A                | Antagonist | 0.1         | 0.0         | 0.1     |
| ADRA2A                | Agonist    | 0.0         | 0.0         | 0.0     |
| ADRA2A                | Antagonist | 27.1        | 32.8        | 30.0    |
| ADRB1                 | Agonist    | 0.3         | 1.1         | 0.7     |
| ADRB1                 | Antagonist | 0.0         | 0.0         | 0.0     |
| ADRB2                 | Agonist    | 0.0         | 0.0         | 0.0     |
| ADRB2                 | Antagonist | 0.0         | 0.0         | 0.0     |
| AVPR1A                | Agonist    | 0.0         | 0.0         | 0.0     |
| AVPR1A                | Antagonist | 0.0         | 0.0         | 0.0     |
| CCKAR                 | Agonist    | 0.4         | 0.0         | 0.2     |
| CCKAR                 | Antagonist | 21.3        | 33.4        | 27.4    |
| CHRM1                 | Agonist    | 0.0         | 0.0         | 0.0     |
| CHRM1                 | Antagonist | 1.5         | 0.0         | 0.7     |
| CHRM2                 | Agonist    | 0.0         | 0.0         | 0.0     |
| CHRM2                 | Antagonist | 32.4        | 24.9        | 28.7    |
| CHRM3                 | Agonist    | 0.5         | 1.8         | 1.2     |
| CHRM3                 | Antagonist | 15.1        | 6.7         | 10.9    |
| CNR1                  | Agonist    | 0.0         | 0.0         | 0.0     |
| CNR1                  | Antagonist | 8.9         | 12.4        | 10.7    |
| CNR2                  | Agonist    | 2.0         | 10.0        | 6.0     |
| CNR2                  | Antagonist | 4.1         | 3.8         | 4.0     |
| DRD1                  | Agonist    | 0.0         | 0.0         | 0.0     |
| DRD1                  | Antagonist | 3.5         | 2.9         | 3.2     |
| DRD2S                 | Agonist    | 2.5         | 1.9         | 2.2     |
| DRD2S                 | Antagonist | 1.5         | 3.0         | 2.3     |
| EDNRA                 | Agonist    | 2.0         | 1.9         | 2.0     |
| EDNRA                 | Antagonist | 38.5        | 20.0        | 29.3    |
| HRH1                  | Agonist    | 0.7         | 2.7         | 1.7     |
| HRH1                  | Antagonist | 0.0         | 6.6         | 3.3     |
| HRH2                  | Agonist    | 1.2         | 0.0         | 0.6     |
| HRH2                  | Antagonist | 0.0         | 0.0         | 0.0     |
| HTR1A                 | Agonist    | 0.0         | 0.0         | 0.0     |
| HTR1A                 | Antagonist | 14.8        | 28.1        | 21.5    |
| HTR1B                 | Agonist    | 0.0         | 0.0         | 0.0     |
| HTR1B                 | Antagonist | 9.3         | 9.6         | 9.5     |
| HTR2A                 | Agonist    | 0.0         | 0.0         | 0.0     |
| HTR2A                 | Antagonist | 12.3        | 10.7        | 11.5    |
| HTR2B                 | Agonist    | 0.0         | 0.0         | 0.0     |
| HTR2B                 | Antagonist | 5.2         | 21.0        | 13.1    |
| OPRD1                 | Agonist    | 0.0         | 0.0         | 0.0     |
| OPRD1                 | Antagonist | 13.8        | 18.5        | 16.2    |
| OPRK1                 | Agonist    | 0.0         | 0.0         | 0.0     |
| OPRK1                 | Antagonist | 14.8        | 14.3        | 14.6    |
| OPRM1                 | Agonist    | 0.0         | 0.0         | 0.0     |
| OPRM1                 | Antagonist | 26.4        | 33.8        | 30.1    |

  

| DiscoverX Gene Symbol            | Assay Mode | NPD-2975    |             |         |
|----------------------------------|------------|-------------|-------------|---------|
|                                  |            | 10 µM       |             |         |
|                                  |            | % Response  |             |         |
|                                  |            | Replicate 1 | Replicate 2 | Average |
| <b>Nuclear Hormone Receptors</b> |            |             |             |         |
| AR                               | Agonist    | 0.0         | 0.0         | 0.0     |
| AR                               | Antagonist | 11.7        | 0.0         | 5.8     |
| GR                               | Agonist    | 0.0         | 0.0         | 0.0     |
| GR                               | Antagonist | 0.0         | 0.0         | 0.0     |
| <b>Transporters</b>              |            |             |             |         |
| DAT                              | Blocker    | 17.2        | 12.2        | 14.7    |
| NET                              | Blocker    | 0.0         | 0.0         | 0.0     |
| SERT                             | Blocker    | 0.0         | 0.0         | 0.0     |
| <b>Ion Channels</b>              |            |             |             |         |
| CAV1.2                           | Blocker    | 0.0         | 0.0         | 0.0     |
| GABAA                            | Opener     | 2.3         | 4.3         | 3.3     |
| GABAA                            | Blocker    | 0.0         | 6.3         | 3.1     |
| hERG                             | Blocker    | 0.0         | 60.9        | 30.5    |
| HTR3A                            | Opener     | 0.0         | 0.0         | 0.0     |
| HTR3A                            | Blocker    | 7.4         | 9.1         | 8.3     |
| KvLQT1/minK                      | Opener     | 2.5         | 0.7         | 1.6     |
| KvLQT1/minK                      | Blocker    | 3.4         | 1.3         | 2.3     |
| nAChR(α4/β2)                     | Opener     | 1.9         | 0.0         | 0.9     |
| nAChR(α4/β2)                     | Blocker    | 40.5        | 19.7        | 30.1    |
| NAV1.5                           | Blocker    | 0.0         | 4.6         | 2.3     |
| NMDAR (1A/2B)                    | Opener     | 7.0         | 0.0         | 3.5     |
| NMDAR (1A/2B)                    | Blocker    | 5.2         | 0.0         | 2.6     |
| <b>Non-Kinase Enzymes</b>        |            |             |             |         |
| ACHe                             | Inhibitor  | 0.0         | 0.0         | 0.0     |
| COX1                             | Inhibitor  | 8.5         | 17.0        | 12.7    |
| COX2                             | Inhibitor  | 0.0         | 0.0         | 0.0     |
| MAOA                             | Inhibitor  | 12.6        | 0.0         | 6.3     |
| PDE3A                            | Inhibitor  | 0.0         | 0.0         | 0.0     |
| PDE4D2                           | Inhibitor  | 79.2        | 71.7        | 75.5    |
| <b>Kinases</b>                   |            |             |             |         |
| INSR                             | Inhibitor  | 0.0         | 0.5         | 0.3     |
| LCK                              | Inhibitor  | 35.4        | 46.0        | 40.7    |
| ROCK1                            | Inhibitor  | 7.7         | 7.5         | 7.6     |
| VEGFR2                           | Inhibitor  | 0.0         | 0.0         | 0.0     |

Table S4. *In vitro* metabolic stability of **30** using mouse, rat and human S9 microsomal fractions.

| Microsomes | Phase-I/II        | Time (min) | <b>30</b> <sup>a</sup> | <b>Diclofenac</b> <sup>a</sup> |
|------------|-------------------|------------|------------------------|--------------------------------|
| Mouse      | CYP450 -<br>NADPH | 0          | 100                    | 100                            |
|            |                   | 15         | 73 ± 2.8               | 85 ± 0.0                       |
|            |                   | 30         | 55 ± 1.8               | 62 ± 7.1                       |
|            |                   | 60         | 33 ± 3.4               | 49 ± 2.4                       |
|            |                   |            | (n=2)                  | (n=2)                          |
|            | UGT enzymes       | 0          | 100                    | 100                            |
|            |                   | 15         | 93 ± 4.2               | 56 ± 16                        |
|            |                   | 30         | 81 ± 2.7               | 46 ± 10                        |
|            |                   | 60         | 71 ± 5.4               | 39 ± 0.0                       |
|            |                   |            | (n=2)                  | (n=2)                          |
| Rat        | CYP450 -<br>NADPH | 0          | 100                    | 100                            |
|            |                   | 15         | 93 ± 10.2              | 73 ± 15.1                      |
|            |                   | 30         | 92 ± 2.4               | 57 ± 24.0                      |
|            |                   | 60         | 78 ± 0.2               | 34 ± 36.5                      |
|            |                   |            | (n=2)                  | (n=3)                          |
|            | UGT enzymes       | 0          | 100                    | 100                            |
|            |                   | 15         | 84 ± 4.9               | 42 ± 21.8                      |
|            |                   | 30         | 87 ± 3.6               | 27 ± 23.2                      |
|            |                   | 60         | 76 ± 7.1               | 22 ± 17.9                      |
|            |                   |            | (n=2)                  | (n=3)                          |
| Human      | CYP450 -<br>NADPH | 0          | 100                    | 100                            |
|            |                   | 15         | 102 ± 5.3              | 43 ± 3.5                       |
|            |                   | 30         | 99 ± 3.1               | 14 ± 1.4                       |
|            |                   | 60         | 92 ± 3.1               | 3 ± 0.0                        |
|            |                   |            | (n=3)                  | (n=2)                          |
|            | UGT enzymes       | 0          | 100                    | 100                            |
|            |                   | 15         | 81 ± 1.1               | 21 ± 0.7                       |
|            |                   | 30         | 79 ± 2.9               | 14 ± 1.4                       |
|            |                   | 60         | 75 ± 2.2               | 11 ± 0.7                       |
|            |                   |            | (n=4)                  | (n=2)                          |

<sup>a</sup> Results are based on at least two repeats and are expressed as mean percentage remaining **30** ± standard error of mean (SEM).

Table S5. Chemical characterization of final compounds.

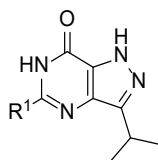

| Code      | R <sup>1</sup>                                                | Formula                                                                      | Yields from <b>8</b> | LCMS retention time (min) | LCMS purity at 254 nm | HR-MS [M+H] <sup>+</sup> |                       |
|-----------|---------------------------------------------------------------|------------------------------------------------------------------------------|----------------------|---------------------------|-----------------------|--------------------------|-----------------------|
|           |                                                               |                                                                              |                      |                           |                       | Calculated               | Found                 |
| <b>1</b>  | Bn                                                            | C <sub>15</sub> H <sub>16</sub> N <sub>4</sub> O                             | 68%                  | 3.66                      | >99%                  | 269.1397                 | 269.1385              |
| <b>9</b>  | 4-PyCH <sub>2</sub>                                           | C <sub>14</sub> H <sub>15</sub> N <sub>5</sub> O                             | 59%                  | 2.26                      | 98%                   | 270.1349                 | 270.1341              |
| <b>10</b> | C <sub>6</sub> H <sub>5</sub> OCH <sub>2</sub>                | C <sub>15</sub> H <sub>16</sub> N <sub>4</sub> O <sub>2</sub>                | 60%                  | 3.80                      | >99%                  | 285.1346                 | 285.1341              |
| <b>11</b> | C <sub>6</sub> H <sub>5</sub> (CH <sub>2</sub> ) <sub>2</sub> | C <sub>16</sub> H <sub>18</sub> N <sub>4</sub> O                             | 71%                  | 3.87                      | >99%                  | 283.1553                 | 283.1545              |
| <b>12</b> | Me                                                            | C <sub>9</sub> H <sub>12</sub> N <sub>4</sub> O                              | 90%                  | 2.46                      | >99%                  | 193.1084                 | 193.1090              |
| <b>13</b> | <sup>n</sup> Bu                                               | C <sub>12</sub> H <sub>18</sub> N <sub>4</sub> O                             | 42%                  | 3.58                      | >99%                  | 235.1553                 | 235.1562              |
| <b>14</b> | <sup>i</sup> Pr                                               | C <sub>11</sub> H <sub>16</sub> N <sub>4</sub> O                             | 87%                  | 3.42                      | >99%                  | 221.1397                 | 221.1405              |
| <b>15</b> | Ph                                                            | C <sub>14</sub> H <sub>14</sub> N <sub>4</sub> O                             | 32%                  | 3.78                      | >99%                  | 277.1060 <sup>a</sup>    | 277.1070 <sup>a</sup> |
| <b>16</b> | 4-Py                                                          | C <sub>13</sub> H <sub>13</sub> N <sub>5</sub> O                             | 33%                  | 2.63                      | >99%                  | 256.1193                 | 256.1186              |
| <b>17</b> | 4-thiazole                                                    | C <sub>11</sub> H <sub>11</sub> N <sub>5</sub> OS                            | 54%                  | 3.40                      | >99%                  | 262.0757                 | 262.0756              |
| <b>18</b> | 2-F-Ph                                                        | C <sub>14</sub> H <sub>13</sub> FN <sub>4</sub> O                            | 33%                  | 3.66                      | >99%                  | 273.1146                 | 273.1144              |
| <b>19</b> | 2-Cl-Ph                                                       | C <sub>14</sub> H <sub>13</sub> ClN <sub>4</sub> O                           | 56%                  | 3.66                      | >99%                  | 289.0851                 | 289.0850              |
| <b>20</b> | 2-Br-Ph                                                       | C <sub>14</sub> H <sub>13</sub> BrN <sub>4</sub> O                           | 88%                  | 3.69                      | >99%                  | 333.0346                 | 333.0333              |
| <b>21</b> | 2-Me-Ph                                                       | C <sub>15</sub> H <sub>16</sub> N <sub>4</sub> O                             | 43%                  | 3.79                      | >99%                  | 269.1397                 | 269.1405              |
| <b>22</b> | 2-OMe-Ph                                                      | C <sub>15</sub> H <sub>16</sub> N <sub>4</sub> O <sub>2</sub>                | 5%                   | 3.96                      | >99%                  | 285.1346                 | 285.1333              |
| <b>23</b> | 3-F-Ph                                                        | C <sub>14</sub> H <sub>13</sub> FN <sub>4</sub> O                            | 37%                  | 3.98                      | 98%                   | 295.0966 <sup>a</sup>    | 295.0954 <sup>a</sup> |
| <b>24</b> | 3-Cl-Ph                                                       | C <sub>14</sub> H <sub>13</sub> ClN <sub>4</sub> O                           | 4%                   | 4.25                      | 99%                   | 311.0670 <sup>a</sup>    | 311.0676 <sup>a</sup> |
| <b>25</b> | 3-Me-Ph                                                       | C <sub>15</sub> H <sub>16</sub> N <sub>4</sub> O                             | 63%                  | 4.10                      | >99%                  | 269.1397                 | 269.1386              |
| <b>26</b> | 3-OMe-Ph                                                      | C <sub>15</sub> H <sub>16</sub> N <sub>4</sub> O <sub>2</sub>                | 33%                  | 3.87                      | >99%                  | 285.1346                 | 285.1339              |
| <b>27</b> | 3-OH-Ph                                                       | C <sub>14</sub> H <sub>14</sub> N <sub>4</sub> O <sub>2</sub>                | 41%                  | 3.23                      | >99%                  | 271.1190                 | 271.1185              |
| <b>28</b> | 3-N(CH <sub>3</sub> ) <sub>2</sub> -Ph                        | C <sub>16</sub> H <sub>19</sub> N <sub>5</sub> O                             | 45%                  | 3.71                      | >99%                  | 298.1662                 | 298.1662              |
| <b>29</b> | 3-SO <sub>2</sub> CH <sub>3</sub> -Ph                         | C <sub>15</sub> H <sub>16</sub> N <sub>4</sub> O <sub>3</sub> S              | 24%                  | 3.29                      | 95%                   | 333.1016                 | 333.1012              |
| <b>30</b> | 4-F-Ph                                                        | C <sub>14</sub> H <sub>13</sub> FN <sub>4</sub> O                            | 62%                  | 3.89                      | >99%                  | 273.1146                 | 273.1144              |
| <b>31</b> | 4-Cl-Ph                                                       | C <sub>14</sub> H <sub>13</sub> ClN <sub>4</sub> O                           | 37%                  | 4.32                      | 98%                   | 289.0851                 | 289.0839              |
| <b>32</b> | 4-Br-Ph                                                       | C <sub>14</sub> H <sub>13</sub> BrN <sub>4</sub> O                           | 54%                  | 4.38                      | >99%                  | 333.0346                 | 333.0347              |
| <b>33</b> | 4-OMe-Ph                                                      | C <sub>15</sub> H <sub>16</sub> N <sub>4</sub> O <sub>2</sub>                | 58%                  | 3.86                      | >99%                  | 285.1346                 | 285.1343              |
| <b>34</b> | 4-O <sup>i</sup> Pr-Ph                                        | C <sub>17</sub> H <sub>20</sub> N <sub>4</sub> O <sub>2</sub>                | 36%                  | 4.40                      | >99%                  | 313.1659                 | 313.1651              |
| <b>35</b> | 4-CF <sub>3</sub> -Ph                                         | C <sub>15</sub> H <sub>13</sub> F <sub>3</sub> N <sub>4</sub> O              | 42%                  | 4.43                      | >99%                  | 345.0934 <sup>a</sup>    | 345.0920 <sup>a</sup> |
| <b>36</b> | 4-OCF <sub>3</sub> -Ph                                        | C <sub>15</sub> H <sub>13</sub> F <sub>3</sub> N <sub>4</sub> O <sub>2</sub> | 15%                  | 4.54                      | >99%                  | 339.1063                 | 339.1069              |
| <b>37</b> | 4-CN-Ph                                                       | C <sub>15</sub> H <sub>13</sub> N <sub>5</sub> O                             | 37%                  | 3.69                      | >99%                  | 280.1193                 | 280.1182              |
| <b>38</b> | 4-COOMe-Ph                                                    | C <sub>16</sub> H <sub>16</sub> N <sub>4</sub> O <sub>3</sub>                | 34%                  | 3.83                      | 97%                   | 313.1295                 | 313.1284              |
| <b>39</b> | 4-COOH-Ph                                                     | C <sub>15</sub> H <sub>14</sub> N <sub>4</sub> O <sub>3</sub>                | 26%                  | 3.16                      | 99%                   | 299.1139                 | 299.1101              |
| <b>40</b> | 4-CONH <sub>2</sub> -Ph                                       | C <sub>15</sub> H <sub>15</sub> N <sub>5</sub> O <sub>2</sub>                | 18%                  | 2.76                      | 97%                   | 320.1118 <sup>a</sup>    | 320.1105 <sup>a</sup> |
| <b>41</b> | 4-SO <sub>2</sub> Me-Ph                                       | C <sub>15</sub> H <sub>16</sub> N <sub>4</sub> O <sub>3</sub> S              | 30%                  | 3.27                      | 97%                   | 333.1016                 | 333.1011              |
| <b>42</b> | 4-SO <sub>2</sub> NH <sub>2</sub> -Ph                         | C <sub>14</sub> H <sub>15</sub> N <sub>5</sub> O <sub>3</sub> S              | 19%                  | 2.96                      | >99%                  | 334.0969                 | 334.0953              |
| <b>43</b> | 4-NHCOCH <sub>3</sub> -Ph                                     | C <sub>16</sub> H <sub>17</sub> N <sub>5</sub> O <sub>2</sub>                | 47%                  | 3.06                      | >99%                  | 312.1455                 | 312.1443              |
| <b>44</b> | 4-(N-piperidine)-Ph                                           | C <sub>19</sub> H <sub>23</sub> N <sub>5</sub> O                             | 23%                  | 4.34                      | >99%                  | 338.1975                 | 338.1964              |
| <b>45</b> | 4-(N-methylpiperazine)-Ph                                     | C <sub>19</sub> H <sub>24</sub> N <sub>6</sub> O                             | 35%                  | 2.53                      | 98%                   | 353.2084                 | 353.2078              |
| <b>46</b> | 4-tetrazole-Ph                                                | C <sub>15</sub> H <sub>14</sub> N <sub>8</sub> O                             | 26%                  | 3.10                      | >99%                  | 323.1363                 | 323.1357              |

<sup>a</sup>: [M+Na]<sup>+</sup>.

Table S6. Anti-*T.brucei* potency of final compounds.

| Code          | Screening concentration ( $\mu\text{M}$ ) |    |    |    |      |      |       |       |       |        | IC <sub>50</sub> | IC <sub>90</sub> |        |
|---------------|-------------------------------------------|----|----|----|------|------|-------|-------|-------|--------|------------------|------------------|--------|
|               | 64                                        | 16 | 4  | 1  | 0.25 | 0.06 | 0.016 | 0.004 | 0.001 | 0.0002 |                  |                  |        |
|               | Growth inhibition (%)                     |    |    |    |      |      |       |       |       |        | $\mu\text{M}$    |                  |        |
| 9 (NPD-2960)  | 9                                         | 15 | 7  | 11 | 7    |      |       |       |       |        |                  | > 64.0           | > 64.0 |
| 9 (NPD-2960)  | 5                                         | 8  | 7  | 7  | 0    |      |       |       |       |        |                  | > 64.0           | > 64.0 |
| 10 (NPD-0434) | 15                                        | 3  | 1  | 0  | 0    |      |       |       |       |        |                  | > 64.0           | > 64.0 |
| 10 (NPD-0434) | 7                                         | 5  | 0  | 0  | 0    |      |       |       |       |        |                  | > 64.0           | > 64.0 |
| 11 (NPD-3281) | 30                                        | 12 | 14 | 11 | 15   |      |       |       |       |        |                  | > 64.0           | > 64.0 |
| 11 (NPD-3281) | 50                                        | 39 | 9  | 3  | 11   |      |       |       |       |        |                  | 64.0             | > 64.0 |
| 12 (NPD-3380) | 0                                         | 0  | 0  | 0  | 0    |      |       |       |       |        |                  | > 64.0           | > 64.0 |
| 12 (NPD-3380) | 9                                         | 11 | 2  | 1  | 2    |      |       |       |       |        |                  | > 64.0           | > 64.0 |
| 13 (NPD-3645) | 75                                        | 67 | 22 | 6  | 3    | 2    | 8     |       |       |        |                  | 9.5              | > 64.0 |
| 13 (NPD-3645) | 72                                        | 65 | 27 | 0  | 0    | 0    | 0     |       |       |        |                  | 9.3              | > 64.0 |
| 14 (NPD-3379) | 66                                        | 23 | 0  | 0  | 0    |      |       |       |       |        |                  | 38.2             | > 64.0 |
| 14 (NPD-3379) | 60                                        | 17 | 8  | 10 | 7    |      |       |       |       |        |                  | 46.4             | > 64.0 |
| 15 (NPD-3200) | 86                                        | 84 | 84 | 84 | 50   |      |       |       |       |        |                  | 0.3              | N.D.   |
| 15 (NPD-3200) | 78                                        | 80 | 79 | 76 | 39   |      |       |       |       |        |                  | 0.4              | N.D.   |
| 15 (NPD-3200) | 89                                        | 87 | 93 | 93 | 72   | 19   | 4     | 0     | 0     | 2      |                  | 0.14             | 0.82   |
| 15 (NPD-3200) | 91                                        | 94 | 97 | 96 | 85   | 11   | 2     | 1     | 4     | 4      |                  | 0.13             | 0.47   |
| 16 (NPD-3488) | 85                                        | 85 | 69 | 27 | 8    |      |       |       |       |        |                  | 2.1              | > 64.0 |
| 16 (NPD-3488) | 82                                        | 80 | 75 | 31 | 21   | 9    | 12    |       |       |        |                  | 1.8              | > 64.0 |
| 17 (NPD-2973) | 80                                        | 54 | 10 | 3  | 3    |      |       |       |       |        |                  | 14.1             | > 64.0 |
| 17 (NPD-2973) | 82                                        | 58 | 5  | 0  | 0    |      |       |       |       |        |                  | 13.0             | > 64.0 |
| 18 (NPD-3199) | 85                                        | 85 | 84 | 58 | 11   |      |       |       |       |        |                  | 0.8              | > 64.0 |
| 18 (NPD-3199) | 77                                        | 80 | 79 | 48 | 5    |      |       |       |       |        |                  | 1.1              | > 64.0 |
| 19 (NPD-3538) | 72                                        | 71 | 72 | 48 | 6    | 21   | 0     |       |       |        |                  | 1.1              | > 64.0 |
| 19 (NPD-3538) | 77                                        | 78 | 78 | 70 | 28   | 0    | 5     |       |       |        |                  | 0.5              | > 64.0 |
| 20 (NPD-3539) | 71                                        | 70 | 73 | 56 | 18   | 19   | 1     |       |       |        |                  | 0.8              | > 64.0 |
| 20 (NPD-3539) | 75                                        | 77 | 78 | 68 | 26   | 5    | 13    |       |       |        |                  | 0.6              | > 64.0 |
| 21 (NPD-3589) | 83                                        | 90 | 81 | 81 | 55   | 6    | 7     |       |       |        |                  | 0.2              | 16.0   |
| 21 (NPD-3589) | 78                                        | 77 | 79 | 79 | 72   | 28   | 0     |       |       |        |                  | 0.1              | > 64.0 |
| 22 (NPD-3590) | 81                                        | 76 | 34 | 2  | 0    | 7    | 5     |       |       |        |                  | 6.8              | > 64.0 |
| 22 (NPD-3590) | 77                                        | 66 | 29 | 0  | 0    | 0    | 0     |       |       |        |                  | 8.8              | > 64.0 |
| 23 (NPD-3202) | 87                                        | 86 | 85 | 86 | 75   |      |       |       |       |        |                  | < 0.3            | > 64.0 |
| 23 (NPD-3202) | 81                                        | 81 | 80 | 80 | 63   |      |       |       |       |        |                  | < 0.3            | > 64.0 |
| 23 (NPD-3202) | 80                                        | 79 | 79 | 79 | 74   | 30   | 0     |       |       |        |                  | 0.1              | > 64.0 |
| 23 (NPD-3202) | 86                                        | 85 | 85 | 84 | 80   | 35   | 0     |       |       |        |                  | 0.1              | > 64.0 |
| 24 (NPD-3591) | 80                                        | 81 | 78 | 79 | 50   | 14   | 7     |       |       |        |                  | 0.3              | > 64.0 |
| 24 (NPD-3591) | 81                                        | 79 | 78 | 76 | 70   | 29   | 6     |       |       |        |                  | 0.1              | > 64.0 |
| 25 (NPD-3382) | 85                                        | 84 | 84 | 79 | 37   |      |       |       |       |        |                  | 0.4              | N.D.   |
| 25 (NPD-3382) | 82                                        | 82 | 82 | 79 | 43   |      |       |       |       |        |                  | 0.3              | N.D.   |
| 25 (NPD-3382) | 90                                        | 91 | 91 | 89 | 62   | 24   | 7     | 0     | 0     | 0      |                  | 0.16             | 2.0    |
| 25 (NPD-3382) | 92                                        | 93 | 94 | 94 | 70   | 12   | 3     | 5     | 7     | 11     |                  | 0.16             | 0.79   |
| 26 (NPD-3375) | 92                                        | 85 | 82 | 66 | 28   |      |       |       |       |        |                  | 0.6              | N.D.   |
| 26 (NPD-3375) | 91                                        | 91 | 81 | 62 | 39   |      |       |       |       |        |                  | 0.5              | N.D.   |
| 26 (NPD-3375) | 95                                        | 89 | 88 | 70 | 24   | 4    | 3     | 4     | 0     | 0      |                  | 0.55             | 20.16  |
| 26 (NPD-3375) | 97                                        | 91 | 91 | 75 | 30   | 5    | 4     | 5     | 8     | 13     |                  | 0.46             | 3.67   |
| 27 (NPD-2974) | 80                                        | 72 | 34 | 6  | 3    |      |       |       |       |        |                  | 7.2              | > 64.0 |
| 27 (NPD-2974) | 81                                        | 77 | 37 | 6  | 0    |      |       |       |       |        |                  | 6.3              | > 64.0 |
| 28 (NPD-3381) | 87                                        | 72 | 20 | 0  | 0    |      |       |       |       |        |                  | 8.9              | > 64.0 |
| 28 (NPD-3381) | 84                                        | 70 | 26 | 0  | 6    |      |       |       |       |        |                  | 8.5              | > 64.0 |
| 29 (NPD-3598) | 79                                        | 24 | 4  | 0  | 7    | 0    | 2     |       |       |        |                  | 30.8             | > 64.0 |
| 30 (NPD-2975) | 81                                        | 76 | 76 | 76 | 76   |      |       |       |       |        |                  | < 0.3            | N.D.   |
| 30 (NPD-2975) | 83                                        | 81 | 84 | 82 | 79   |      |       |       |       |        |                  | < 0.3            | N.D.   |
| 30 (NPD-2975) | 85                                        | 84 | 84 | 84 | 82   | 45   | 33    |       |       |        |                  | 0.1              | N.D.   |



|               |    |    |    |    |    |    |    |   |    |    |        |        |
|---------------|----|----|----|----|----|----|----|---|----|----|--------|--------|
| 30 (NPD-2975) | 84 | 85 | 84 | 85 | 82 | 39 | 11 |   |    |    | 0.1    | N.D.   |
| 30 (NPD-2975) | 90 | 90 | 91 | 93 | 96 | 69 | 10 | 3 | 2  | 0  | 0.04   | 0.18   |
| 30 (NPD-2975) | 91 | 93 | 93 | 94 | 96 | 65 | 7  | 8 | 11 | 11 | 0.04   | 0.19   |
| 31 (NPD-3204) | 90 | 89 | 87 | 85 | 83 |    |    |   |    |    | < 0.3  | 64.0   |
| 31 (NPD-3204) | 85 | 85 | 81 | 81 | 71 |    |    |   |    |    | < 0.3  | > 64.0 |
| 31 (NPD-3204) | 82 | 83 | 81 | 81 | 74 | 39 | 3  |   |    |    | 0.1    | > 64.0 |
| 31 (NPD-3204) | 89 | 89 | 87 | 84 | 81 | 36 | 0  |   |    |    | 0.1    | > 64.0 |
| 32 (NPD-2971) | 81 | 78 | 76 | 67 | 28 |    |    |   |    |    | 0.5    | N.D.   |
| 32 (NPD-2971) | 85 | 83 | 84 | 78 | 30 |    |    |   |    |    | 0.4    | N.D.   |
| 32 (NPD-2971) | 92 | 92 | 93 | 91 | 73 | 18 | 6  | 3 | 0  | 3  | 0.14   | 0.93   |
| 32 (NPD-2971) | 93 | 94 | 94 | 91 | 64 | 9  | 4  | 9 | 10 | 11 | 0.18   | 0.95   |
| 33 (NPD-2972) | 83 | 79 | 74 | 52 | 10 |    |    |   |    |    | 0.9    | > 64.0 |
| 33 (NPD-2972) | 85 | 83 | 82 | 59 | 18 |    |    |   |    |    | 0.7    | > 64.0 |
| 34 (NPD-3377) | 47 | 42 | 34 | 2  | 0  |    |    |   |    |    | > 64.0 | > 64.0 |
| 34 (NPD-3377) | 61 | 52 | 34 | 10 | 11 |    |    |   |    |    | 13.7   | > 64.0 |
| 35 (NPD-3201) | 93 | 87 | 84 | 46 | 10 |    |    |   |    |    | 1.2    | 32.0   |
| 35 (NPD-3201) | 91 | 83 | 79 | 42 | 0  |    |    |   |    |    | 1.3    | 53.8   |
| 36 (NPD-3597) | 95 | 83 | 70 | 42 | 6  | 2  | 2  |   |    |    | 1.5    | 35.9   |
| 36 (NPD-3597) | 81 | 78 | 73 | 52 | 32 | 6  | 8  |   |    |    | 0.9    | > 64.0 |
| 37 (NPD-3203) | 89 | 88 | 86 | 84 | 46 |    |    |   |    |    | 0.3    | N.D.   |
| 37 (NPD-3203) | 83 | 81 | 75 | 72 | 33 |    |    |   |    |    | 0.5    | N.D.   |
| 37 (NPD-3203) | 95 | 94 | 94 | 96 | 72 | 35 | 7  | 3 | 0  | 0  | 0.11   | 0.71   |
| 37 (NPD-3203) | 92 | 93 | 94 | 92 | 49 | 7  | 3  | 4 | 7  | 9  | 0.26   | 0.94   |
| 38 (NPD-3305) | 48 | 9  | 6  | 5  | 2  |    |    |   |    |    | > 64.0 | > 64.0 |
| 38 (NPD-3305) | 43 | 10 | 2  | 5  | 0  |    |    |   |    |    | > 64.0 | > 64.0 |
| 39 (NPD-3489) | 4  | 3  | 0  | 0  | 0  |    |    |   |    |    | > 64.0 | > 64.0 |
| 40 (NPD-3371) | 5  | 2  | 0  | 0  | 0  |    |    |   |    |    | > 64.0 | > 64.0 |
| 40 (NPD-3371) | 4  | 7  | 0  | 5  | 5  |    |    |   |    |    | > 64.0 | > 64.0 |
| 41 (NPD-3376) | 52 | 22 | 1  | 0  | 0  |    |    |   |    |    | 58.4   | > 64.0 |
| 41 (NPD-3376) | 62 | 16 | 15 | 5  | 14 |    |    |   |    |    | 44.6   | > 64.0 |
| 42 (NPD-3372) | 70 | 26 | 5  | 0  | 0  |    |    |   |    |    | 34.1   | > 64.0 |
| 42 (NPD-3372) | 64 | 20 | 6  | 6  | 0  |    |    |   |    |    | 41.2   | > 64.0 |
| 43 (NPD-3280) | 12 | 11 | 11 | 12 | 15 |    |    |   |    |    | > 64.0 | > 64.0 |
| 43 (NPD-3280) | 13 | 26 | 13 | 14 | 4  |    |    |   |    |    | > 64.0 | > 64.0 |
| 44 (NPD-3283) | 38 | 35 | 29 | 20 | 20 |    |    |   |    |    | > 64.0 | > 64.0 |
| 44 (NPD-3283) | 83 | 48 | 28 | 32 | 8  |    |    |   |    |    | 17.3   | > 64.0 |
| 45 (NPD-3282) | 50 | 26 | 13 | 10 | 15 |    |    |   |    |    | 64.0   | > 64.0 |
| 45 (NPD-3282) | 97 | 87 | 11 | 12 | 7  |    |    |   |    |    | 8.1    | 24.3   |
| 46 (NPD-3490) | 23 | 16 | 1  | 3  | 3  |    |    |   |    |    | > 64.0 | > 64.0 |

N.D.: not determined.

Acquired by : Admin  
 Date Acquired : 29/11/2017 2:59:24 PM  
 Sample Name : DOSC-Y  
 Sample ID :  
 Tray# : 1  
 Vial# : 18  
 Injection Volume : 5  
 Data File : C:\LabSolutions\Data\2017\2017-wk48\DOSC-Y1cd  
 Background File : blanco 291120171cd  
 Method File : Method SCAN ACID standard neg.lcm  
 Report Format : DefaultLCMS1cr  
 Tuning File : C:\LabSolutions\Tuning\Tuning-ESI-pos-neg01072015a1ct  
 Processed by : Admin  
 Modified Date : 29/11/2017 4:45:31 PM

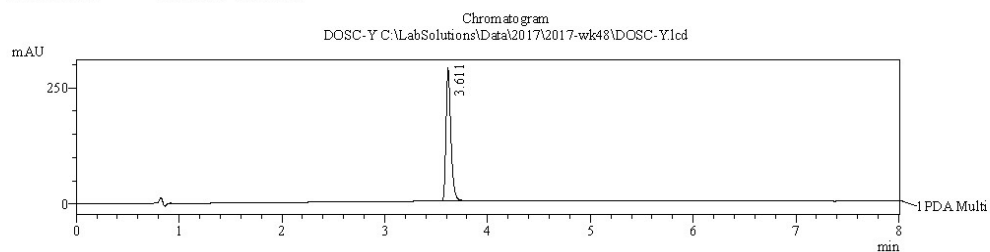

| Peak# | Name | Ret. Time | Area   | Area%   |
|-------|------|-----------|--------|---------|
| 1     |      | 3.611     | 935139 | 100.000 |

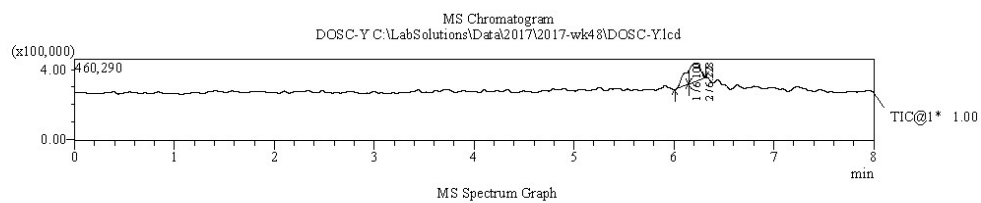

MS Spectrum Table

Figure S4. LCMS spectrum of intermediate 4.

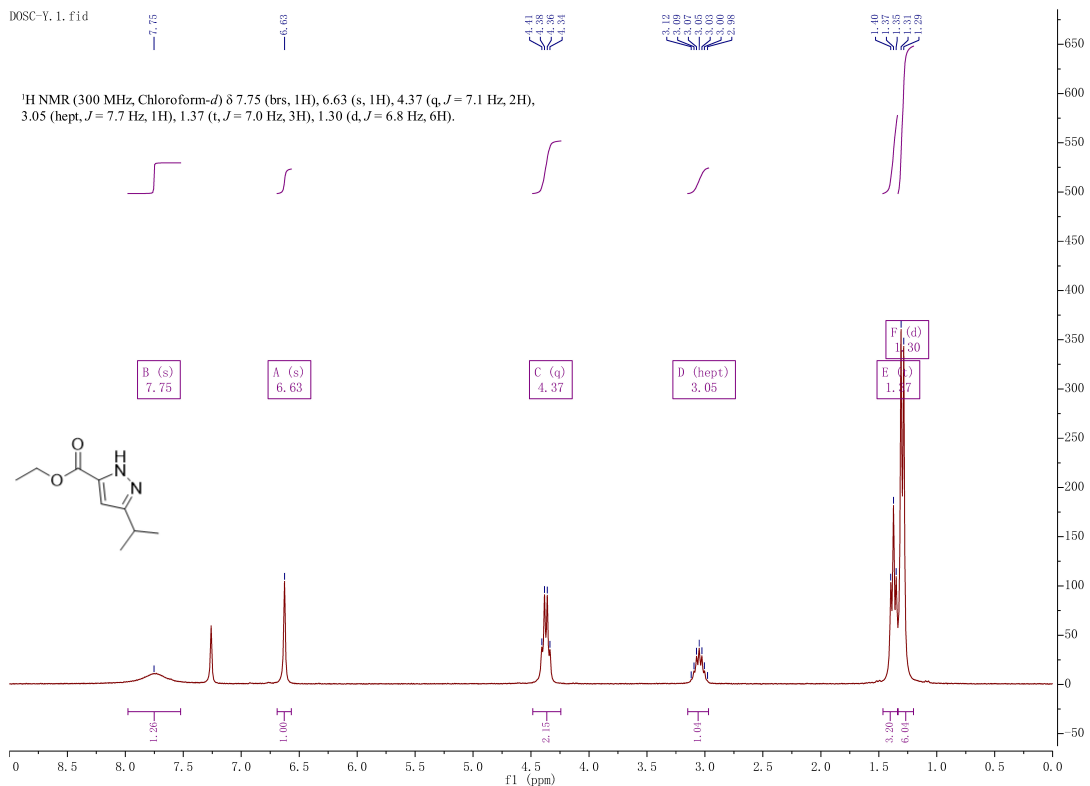

Figure S5. <sup>1</sup>H NMR spectrum of intermediate 4.

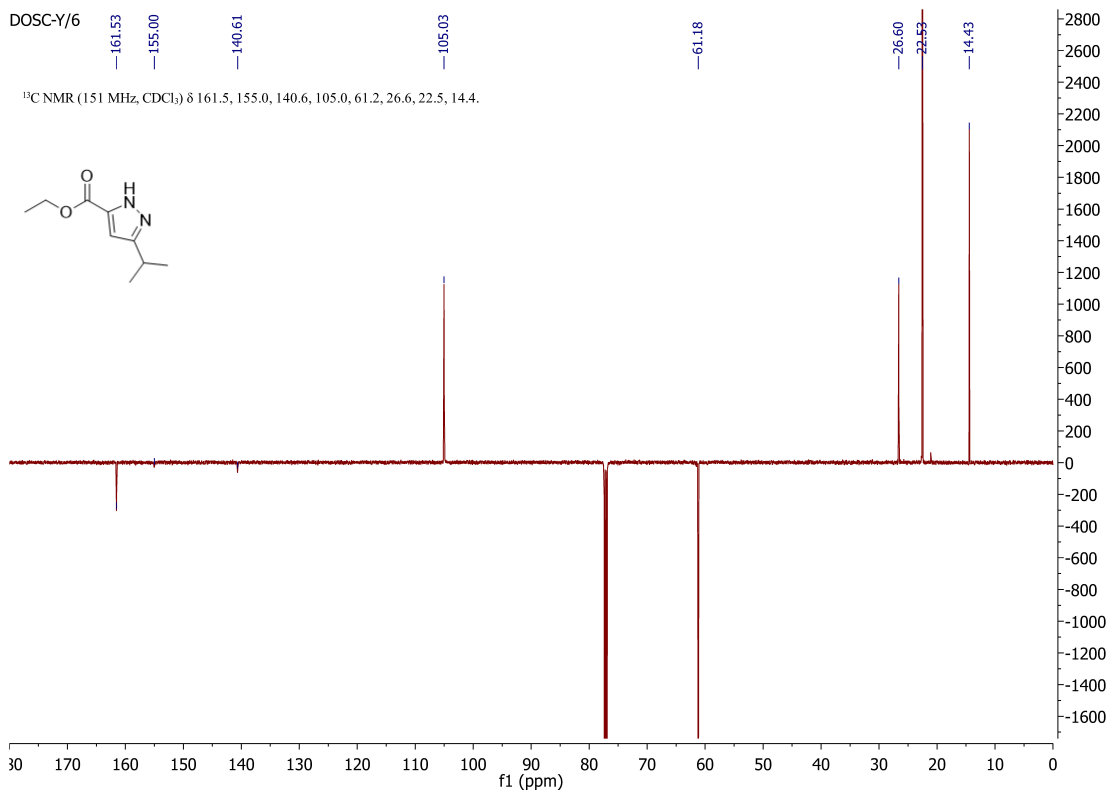

Figure S6. <sup>13</sup>C NMR spectrum of intermediate 4.

Acquired by : Admin  
 Date Acquired : 30/11/2017 4:35:45 PM  
 Sample Name : YAZH01-174  
 Sample ID :  
 Tray# : 1  
 Vial# : 19  
 Injection Volume : 3  
 Data File : C:\LabSolutions\Data\2017\2017-wk48\YAZH01-174.lcd  
 Background File : blanco 30112017.lcd  
 Method File : Method SCAN ACID standard neg.lcm  
 Report Format : DefaultLCMS1cr  
 Tuning File : C:\LabSolutions\Tuning\Tuning-ESI-pos-neg01072015a1cr  
 Processed by : Admin  
 Modified Date : 30/11/2017 5:16:55 PM

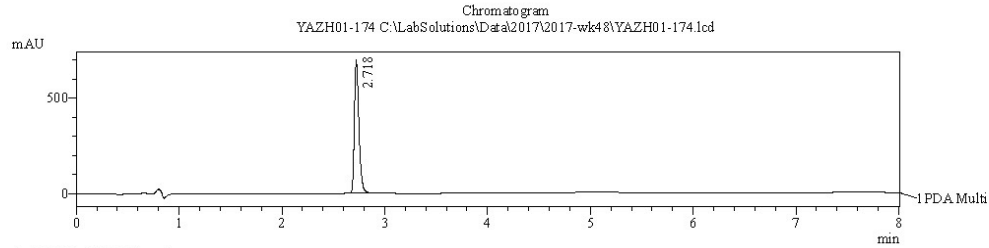

1 PDA Multi 1 / 230nm 4nm  
PDA Ch1 230nm 4nm

| Peak# | Name | Ret. Time | Area    | Area%   |
|-------|------|-----------|---------|---------|
| 1     |      | 2.718     | 2128372 | 100.000 |

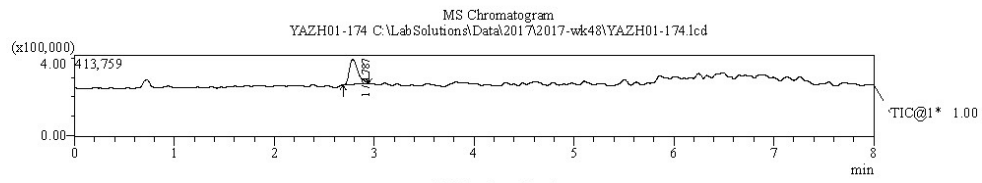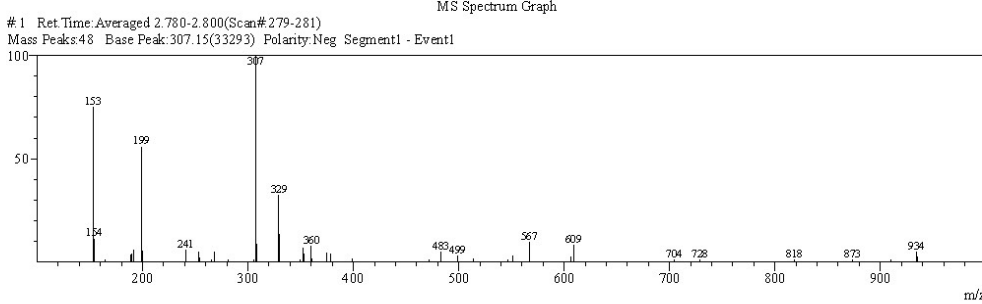

MS Spectrum Table

| #  | m/z    | Abs.Inten. | Rel.Inten. | Charge | Polarity | Monoisotopic |
|----|--------|------------|------------|--------|----------|--------------|
| 1  | 152.95 | 24991      | 75.06      |        |          |              |
| 2  | 154.00 | 3728       | 11.20      |        |          |              |
| 3  | 164.20 | 371        | 1.11       |        |          |              |
| 4  | 188.95 | 1070       | 3.21       |        |          |              |
| 5  | 189.95 | 1269       | 3.81       |        |          |              |
| 6  | 191.15 | 1966       | 5.91       |        |          |              |
| 7  | 191.95 | 356        | 1.07       |        |          |              |
| 8  | 198.90 | 18560      | 55.75      |        |          |              |
| 9  | 200.15 | 1817       | 5.46       |        |          |              |
| 10 | 241.10 | 1926       | 5.78       |        |          |              |
| 11 | 252.85 | 1604       | 4.82       |        |          |              |
| 12 | 253.85 | 698        | 2.10       |        |          |              |
| 13 | 264.85 | 333        | 1.00       |        |          |              |
| 14 | 268.10 | 1599       | 4.80       |        |          |              |
| 15 | 280.80 | 395        | 1.19       |        |          |              |
| 16 | 305.80 | 408        | 1.23       |        |          |              |
| 17 | 307.15 | 33293      | 100.00     |        |          |              |
| 18 | 308.30 | 2856       | 8.58       |        |          |              |

Figure S7. LCMS spectrum of intermediate 5.

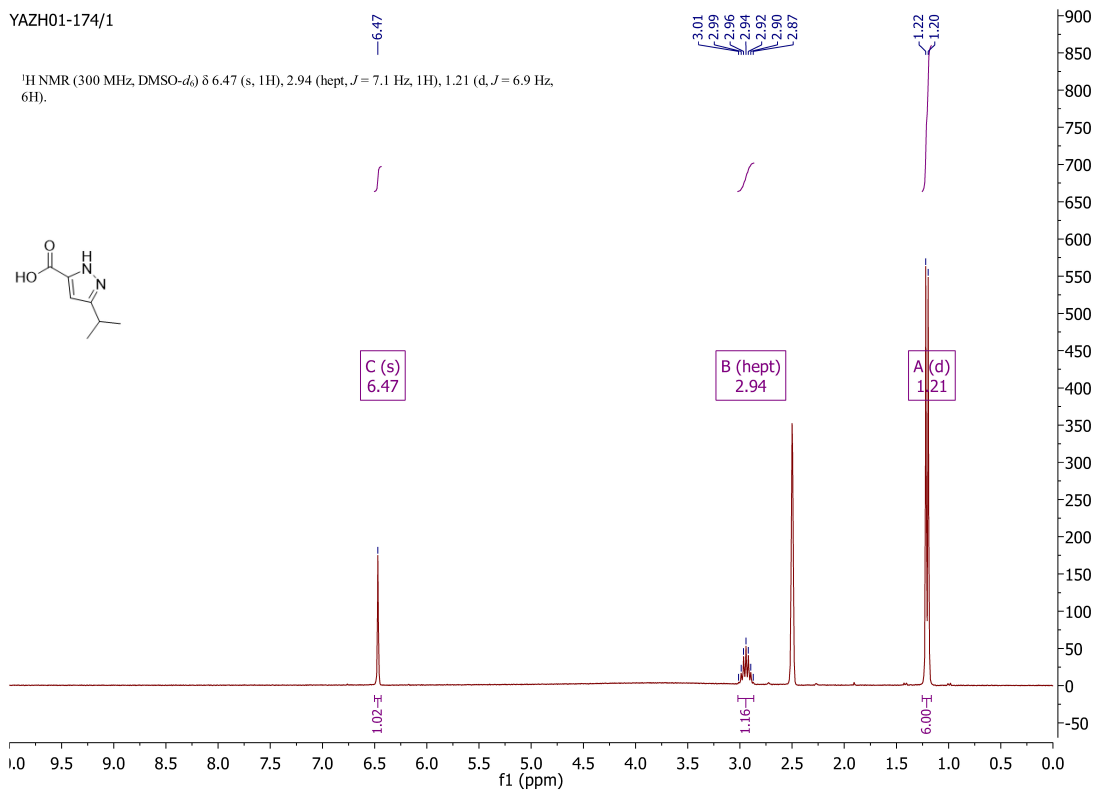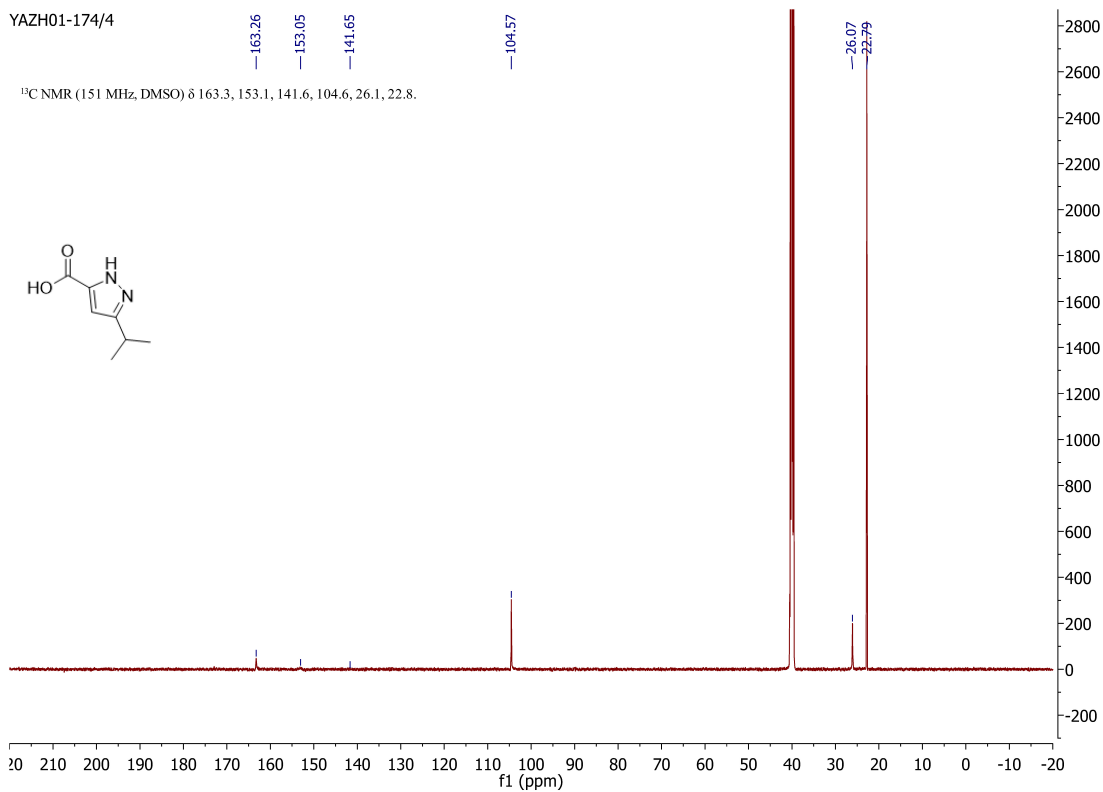

Acquired by : Admin  
 Date Acquired : 8/12/2017 10:01:17 AM  
 Sample Name : YAZH01-175  
 Sample ID :  
 Tray# : 1  
 Vial# : 2  
 Injection Volume : 1  
 Data File : C:\LabSolutions\Data\2017\2017-wk49\YAZH01-175.lcd  
 Background File : blanco 08122017.lcd  
 Method File : Method SCAN ACID standard neg.lcm  
 Report Format : DefaultLCMS1cr  
 Tuning File : C:\LabSolutions\Tuning\Tuning-ESI-pos-neg01072015a1.ct  
 Processed by : Admin  
 Modified Date : 8/12/2017 10:19:37 AM

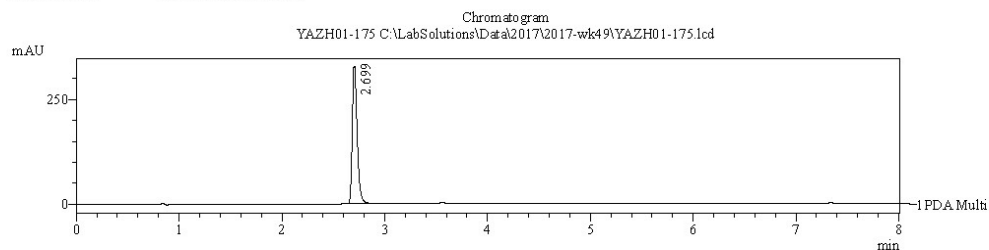

| Peak# | Name | Ret. Time | Area    | Area%   |
|-------|------|-----------|---------|---------|
| 1     |      | 2.699     | 1061032 | 100.000 |

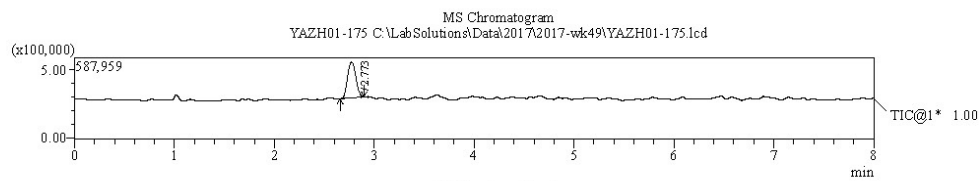

MS Spectrum Graph

#1 Ret. Time: Averaged 2.760-2.780(Scan# 277-279)  
 Mass Peaks: 23 Base Peak: 197.95(130385) Polarity: Neg Segment1 - Event1

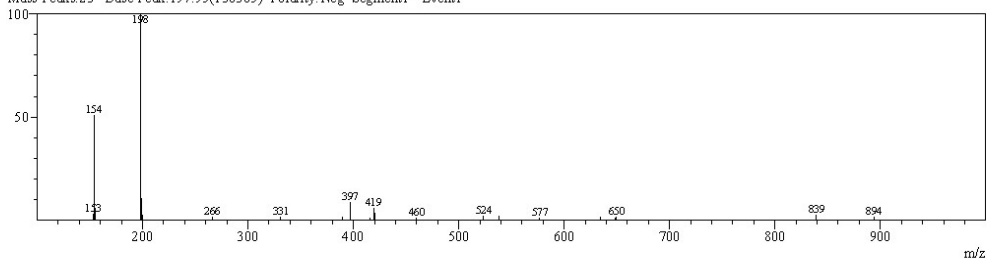

MS Spectrum Table

#1 Ret. Time:  
 BG Mode: Calc 2.660<->2.900(267<->291)  
 Mass Peaks: 23 Base Peak: 197.95(130385) Polarity: Neg Segment1 - Event1

| # | m/z    | Abs.Inten. | Rel.Inten. | Charge | Polarity | Monoisotopic | #  | m/z    | Abs.Inten. | Rel.Inten. | Charge | Polarity | Monoisotopic |
|---|--------|------------|------------|--------|----------|--------------|----|--------|------------|------------|--------|----------|--------------|
| 1 | 153.35 | 3881       | 2.98       |        |          |              | 10 | 397.10 | 11182      | 8.58       |        |          |              |
| 2 | 153.80 | 66389      | 50.92      |        |          |              | 11 | 415.75 | 1609       | 1.23       |        |          |              |
| 3 | 154.90 | 6937       | 5.32       |        |          |              | 12 | 419.10 | 7617       | 5.84       |        |          |              |
| 4 | 197.95 | 130385     | 100.00     |        |          |              | 13 | 420.10 | 4737       | 3.63       |        |          |              |
| 5 | 199.20 | 13982      | 10.72      |        |          |              | 14 | 460.05 | 1372       | 1.05       |        |          |              |
| 6 | 200.30 | 3011       | 2.31       |        |          |              | 15 | 523.60 | 2524       | 1.94       |        |          |              |
| 7 | 266.20 | 2025       | 1.55       |        |          |              | 16 | 537.85 | 2480       | 1.90       |        |          |              |
| 8 | 331.05 | 1917       | 1.47       |        |          |              | 17 | 576.80 | 1364       | 1.05       |        |          |              |
| 9 | 390.05 | 1939       | 1.49       |        |          |              | 18 | 634.40 | 1305       | 1.00       |        |          |              |

Figure S10. LCMS spectrum of compound intermediate 6.

YAZH01-175/3

$^1\text{H}$  NMR (600 MHz,  $\text{DMSO}-d_6$ )  $\delta$  3.49 (hept,  $J = 7.1$  Hz, 1H), 1.29 (d,  $J = 7.0$  Hz, 6H).

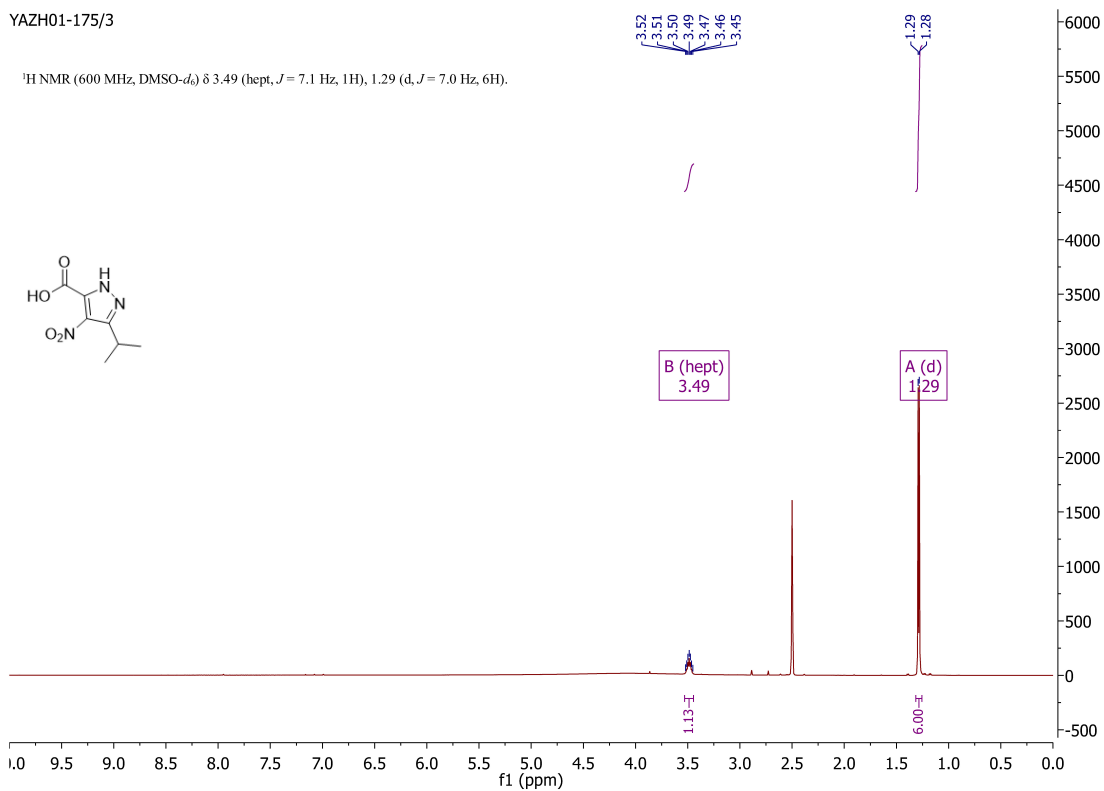

Figure S11.  $^1\text{H}$  NMR spectrum of compound intermediate 6.

YAZH01-175/5

$^{13}\text{C}$  NMR (151 MHz,  $\text{DMSO}$ )  $\delta$  162.8, 149.8, 129.4, 25.5, 21.2.

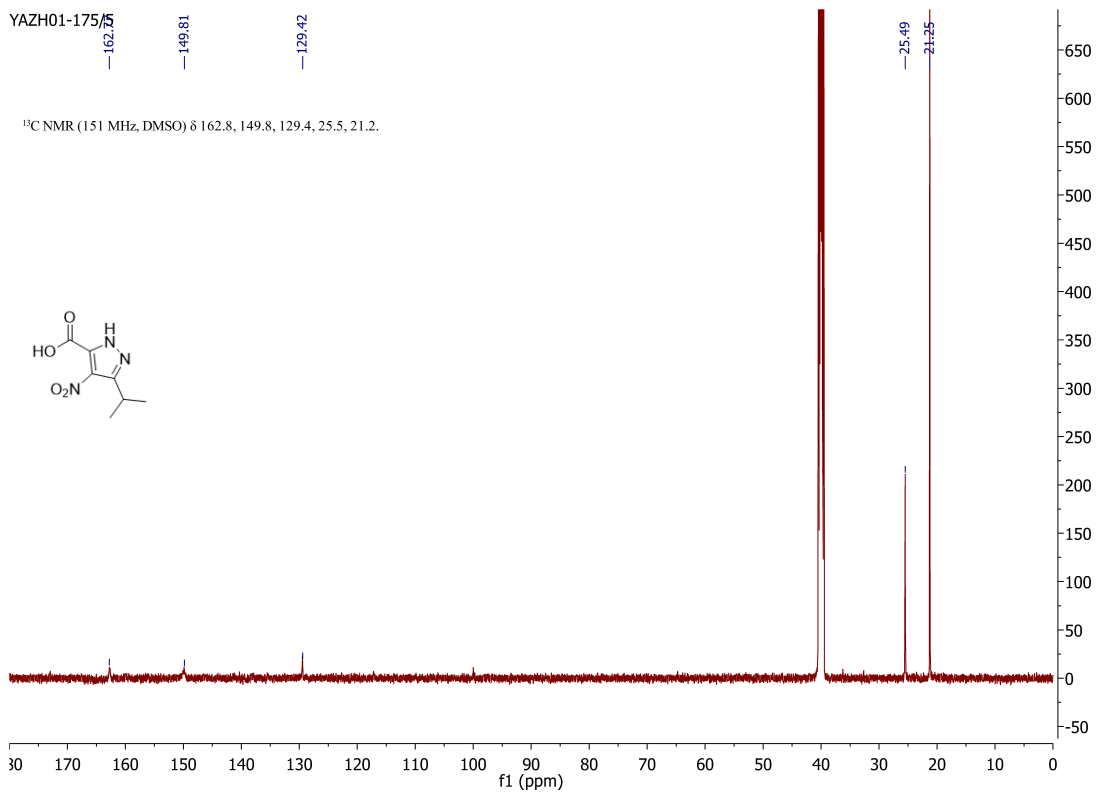

Figure S12.  $^{13}\text{C}$  NMR spectrum of compound intermediate 6.

Acquired by : Admin  
 Date Acquired : 17/1/2018 12:53:30 PM  
 Sample Name : YAZH01-178-2  
 Sample ID :  
 Tray# : 1  
 Vial# : 12  
 Injection Volume : 3  
 Data File : C:\LabSolutions\Data\2018\2018-wk03\YAZH01-178-2.lcd  
 Background File : azoblanco\_170118.lcd  
 Method File : Method SCAN ACID standard MW501cm  
 Report Format : DefaultLCMS.lcr  
 Tuning File : C:\LabSolutions\Tuning\Tuning-ESI-pos-neg01072015a.lct  
 Processed by : Admin  
 Modified Date : 17/1/2018 1:28:51 PM

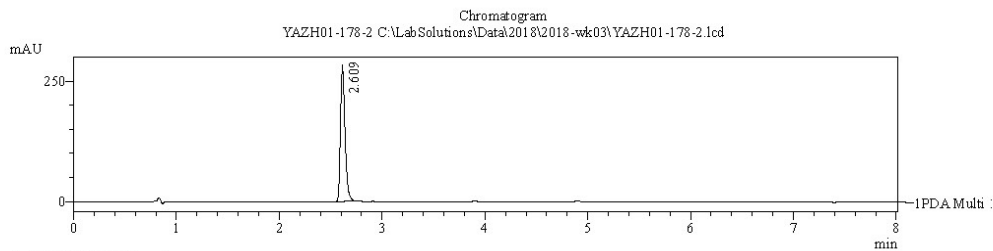

| Peak# | Name | Ret. Time | Area   | Area%   |
|-------|------|-----------|--------|---------|
| 1     |      | 2.609     | 874974 | 100.000 |

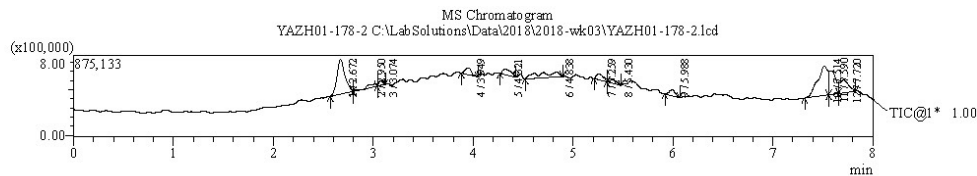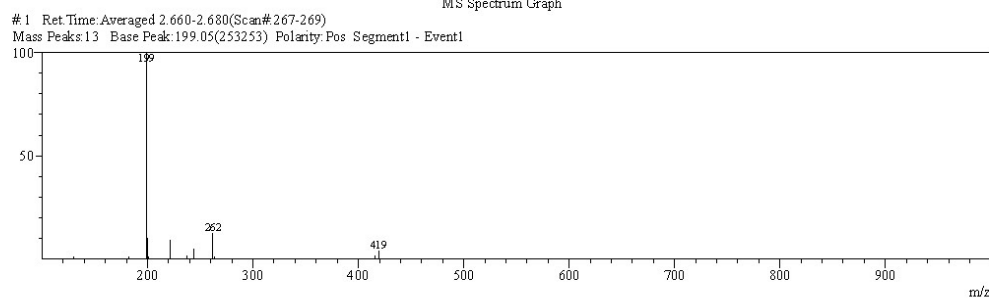

MS Spectrum Table

| # | m/z    | Abs.Inten. | Rel.Inten. | Charge | Polarity | Monoisotopic | #  | m/z    | Abs.Inten. | Rel.Inten. | Charge | Polarity | Monoisotopic |
|---|--------|------------|------------|--------|----------|--------------|----|--------|------------|------------|--------|----------|--------------|
| 1 | 83.05  | 22307      | 8.81       |        |          |              | 8  | 237.10 | 3977       | 1.57       |        |          |              |
| 2 | 130.25 | 3021       | 1.19       |        |          |              | 9  | 244.30 | 12009      | 4.74       |        |          |              |
| 3 | 182.15 | 3060       | 1.21       |        |          |              | 10 | 261.95 | 31542      | 12.45      |        |          |              |
| 4 | 199.05 | 253253     | 100.00     |        |          |              | 11 | 263.20 | 3209       | 1.27       |        |          |              |
| 5 | 200.05 | 25879      | 10.22      |        |          |              | 12 | 415.90 | 4394       | 1.74       |        |          |              |
| 6 | 201.05 | 2877       | 1.14       |        |          |              | 13 | 419.20 | 9988       | 3.94       |        |          |              |
| 7 | 221.10 | 22731      | 8.98       |        |          |              |    |        |            |            |        |          |              |

Figure S13. LCMS spectrum of compound intermediate 7.



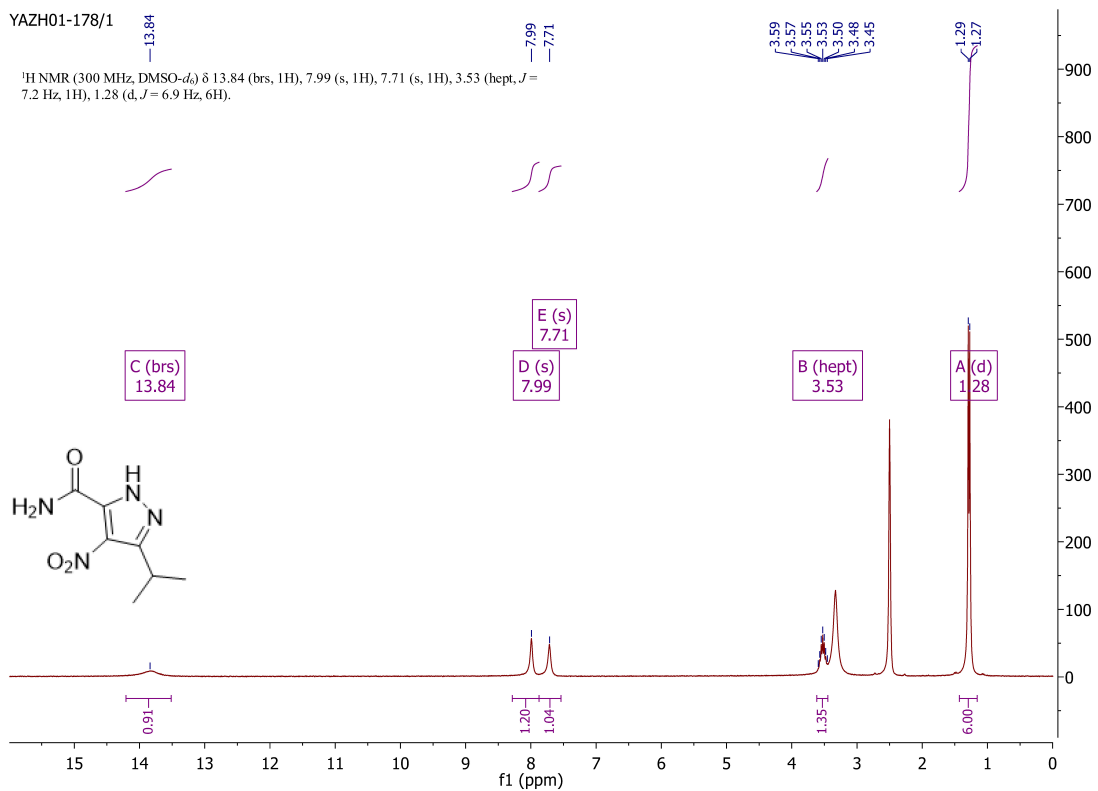

Figure S14.  $^1\text{H NMR}$  spectrum of compound intermediate 7.

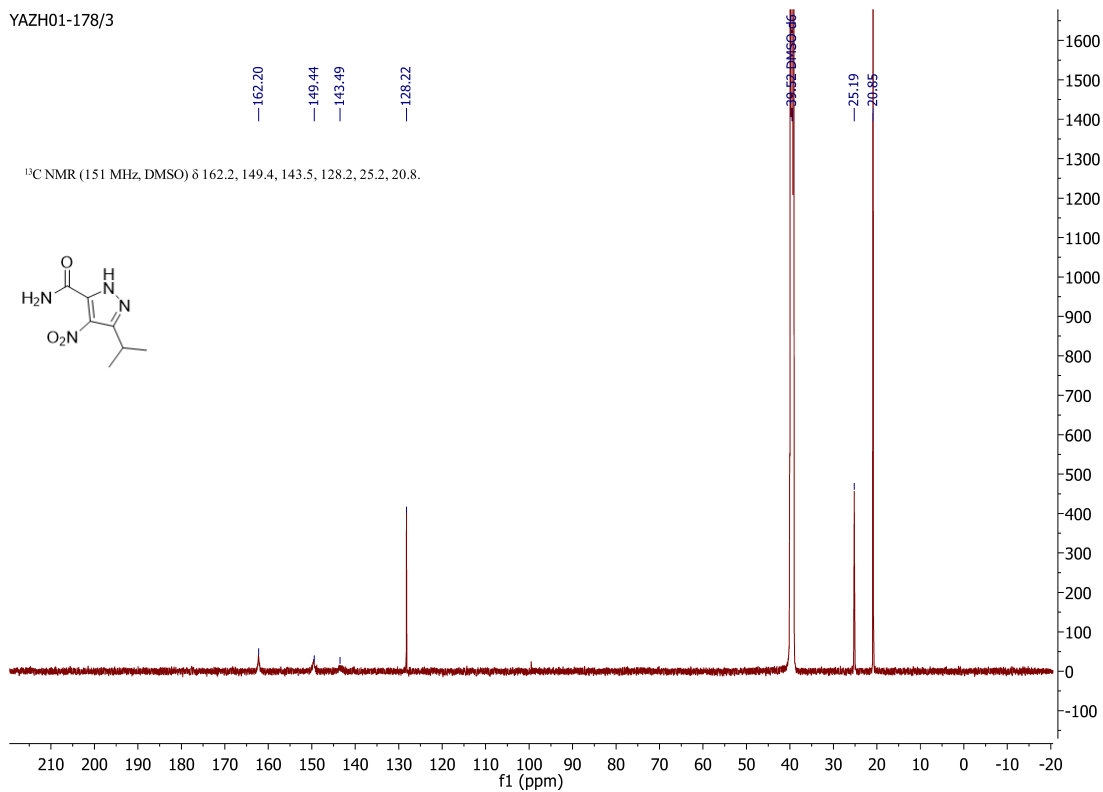

Figure S15.  $^{13}\text{C NMR}$  spectrum of compound intermediate 7.

Acquired by : Admin  
 Date Acquired : 4/6/2019 12:32:06 PM  
 Sample Name : YAZH01-280  
 Sample ID :  
 Tray# : 1  
 Vial# : 15  
 Injection Volume : 2  
 Data File : C:\LabSolutions\Data\2019\2019-wk23\YAZH01-2801.cd  
 Background File : blanco2.lcd  
 Method File : Method SCAN BASE standard.lcm  
 Report Format : DefaultLCMS.lcr  
 Tuning File : C:\LabSolutions\Tuning\Tuning-ESI-pos-neg01072015a.lct  
 Processed by : Admin  
 Modified Date : 4/6/2019 1:39:14 PM

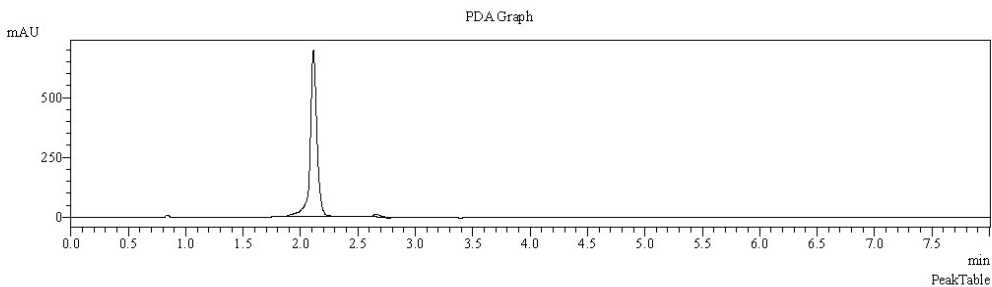

PDA Ch1 254nm 4nm

| Peak# | Name | Ret. Time | Area    | Area % |
|-------|------|-----------|---------|--------|
| 1     |      | 2.106     | 2851886 | 98.737 |
| 2     |      | 2.653     | 32373   | 1.121  |
| 3     |      | 5.243     | 4115    | 0.142  |

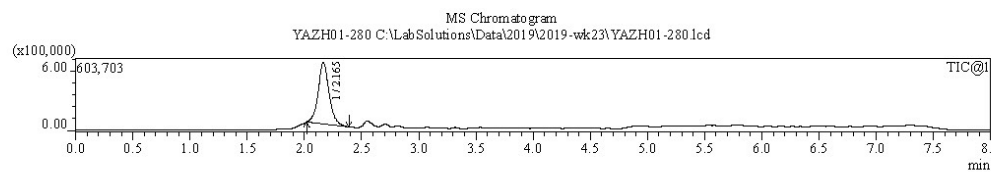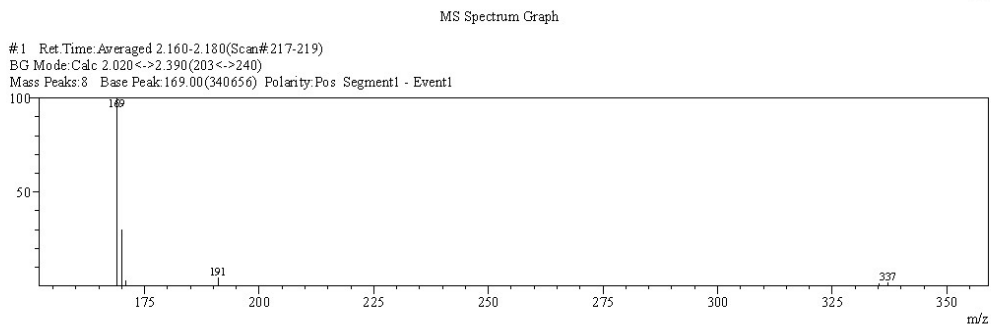

MS Spectrum Table

#1 Ret. Time:  
 BG Mode: Calc 2.020<->2.390(203<->240)  
 Mass Peaks: 8 Base Peak: 169.00(340656) Polarity: Pos Segment1 - Event1

| # | m/z    | Abs. Inten. | Rel. Inten. | Charge | Polarity | Monoisotopic | # | m/z    | Abs. Inten. | Rel. Inten. | Charge | Polarity | Monoisotopic |
|---|--------|-------------|-------------|--------|----------|--------------|---|--------|-------------|-------------|--------|----------|--------------|
| 1 | 151.95 | 18506       | 5.43        |        |          |              | 5 | 191.00 | 14913       | 4.38        |        |          |              |
| 2 | 169.00 | 340656      | 100.00      |        |          |              | 6 | 335.15 | 4759        | 1.40        |        |          |              |
| 3 | 170.00 | 100719      | 29.57       |        |          |              | 7 | 337.10 | 4998        | 1.47        |        |          |              |
| 4 | 171.00 | 8610        | 2.53        |        |          |              | 8 | 359.10 | 5800        | 1.70        |        |          |              |

Figure S16. LCMS spectrum of compound 8.

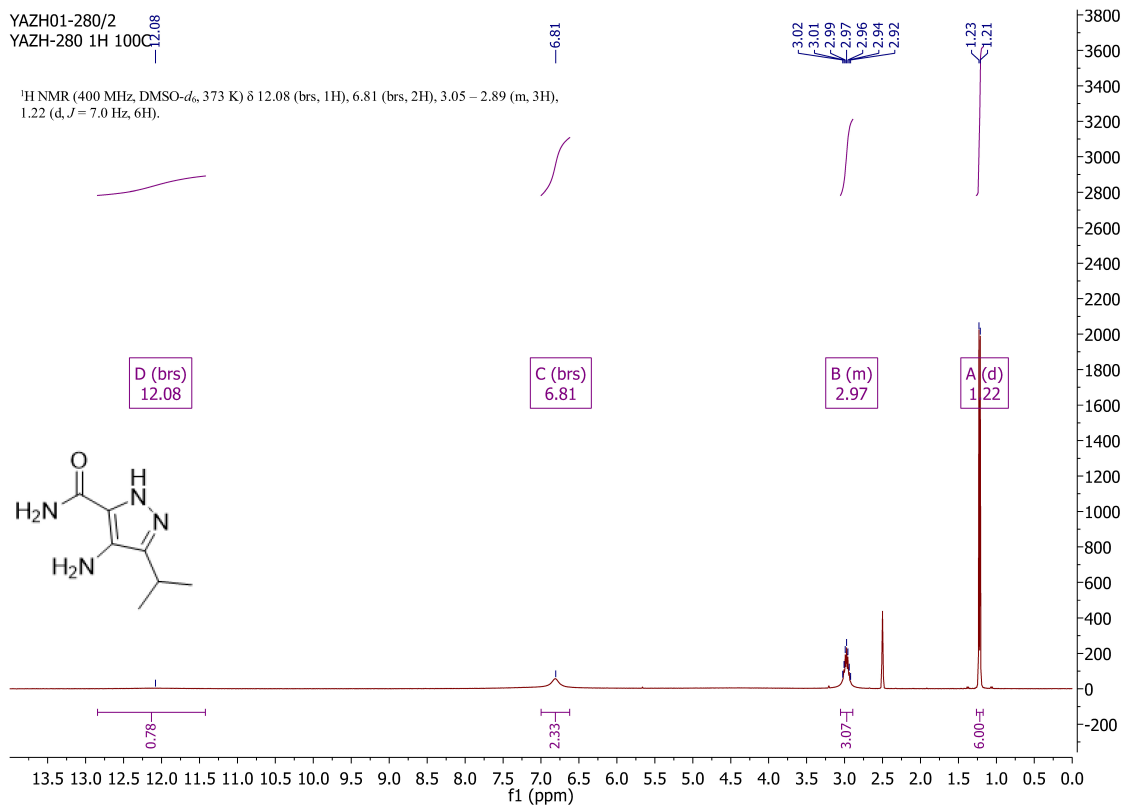

Figure S17. <sup>1</sup>H NMR spectrum of compound **8** at 373.15 K.

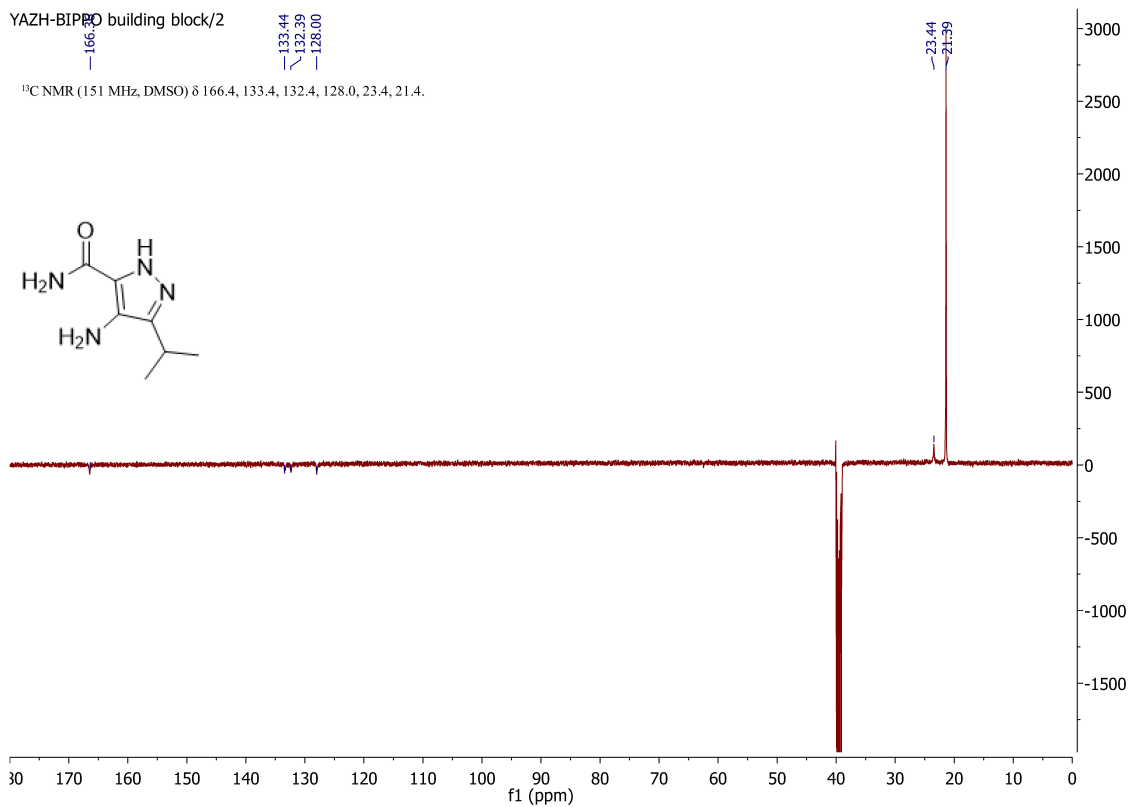

Figure S18. <sup>13</sup>C NMR spectrum of intermediate **8**.

Acquired by : Admin  
 Date Acquired : 11/6/2019 8:48:12 AM  
 Sample Name : BIPPO  
 Sample ID :  
 Tray# : 1  
 Vial# : 1  
 Injection Volume : 2  
 Data File : C:\LabSolutions\Data\2019\2019-wk24\BIPPO1.cld  
 Background File : Blanco110620191.cld  
 Method File : Method SCAN ACID standard1.cld  
 Report Format : DefaultLCMS1.cld  
 Tuning File : C:\LabSolutions\Tuning\Tuning-ESI-pos-neg01072015a1.cld  
 Processed by : Admin  
 Modified Date : 11/6/2019 9:17:16 AM

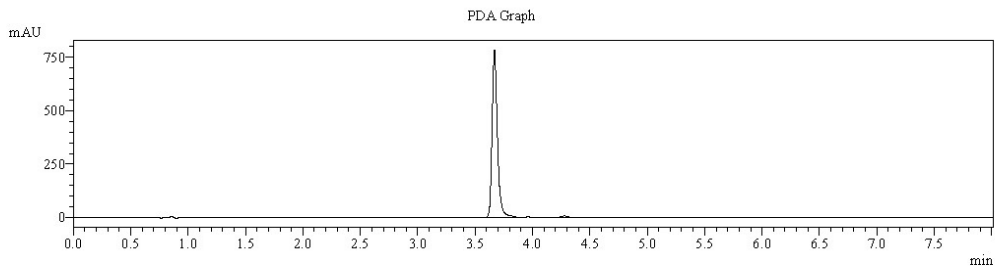

PDA Ch1 254nm 4nm

| Peak# | Name | Ret. Time | Area    | Area % |
|-------|------|-----------|---------|--------|
| 1     |      | 3.663     | 2492261 | 99.036 |
| 2     |      | 4.272     | 24258   | 0.964  |

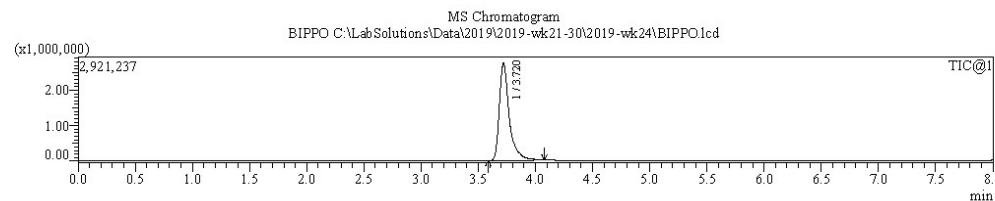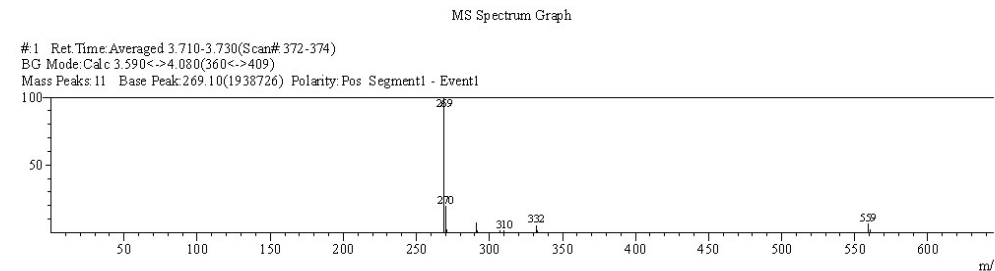

MS Spectrum Table

# 1 Ret. Time: Averaged 3.710-3.730(Scan# 372-374)  
 BG Mode: Calc 3.590<->4.080(360<->409)  
 Mass Peaks: 11 Base Peak: 269.10(1938726) Polarity: Pos Segment1 - Event1

| # | m/z    | Abs.Inten. | Rel.Inten. | Charge | Polarity | Monoisotopic | #  | m/z    | Abs.Inten. | Rel.Inten. | Charge | Polarity | Monoisotopic |
|---|--------|------------|------------|--------|----------|--------------|----|--------|------------|------------|--------|----------|--------------|
| 1 | 269.10 | 1938726    | 100.00     |        |          |              | 7  | 310.15 | 25842      | 1.33       |        |          |              |
| 2 | 270.10 | 372456     | 19.21      |        |          |              | 8  | 332.10 | 103390     | 5.33       |        |          |              |
| 3 | 271.05 | 38608      | 1.99       |        |          |              | 9  | 333.10 | 21381      | 1.10       |        |          |              |
| 4 | 291.10 | 138093     | 7.12       |        |          |              | 10 | 559.30 | 122379     | 6.31       |        |          |              |
| 5 | 292.05 | 27110      | 1.40       |        |          |              | 11 | 560.30 | 39867      | 2.06       |        |          |              |
| 6 | 307.05 | 21862      | 1.13       |        |          |              |    |        |            |            |        |          |              |

Figure S19. LCMS spectrum of compound 1 (NPD-0019).

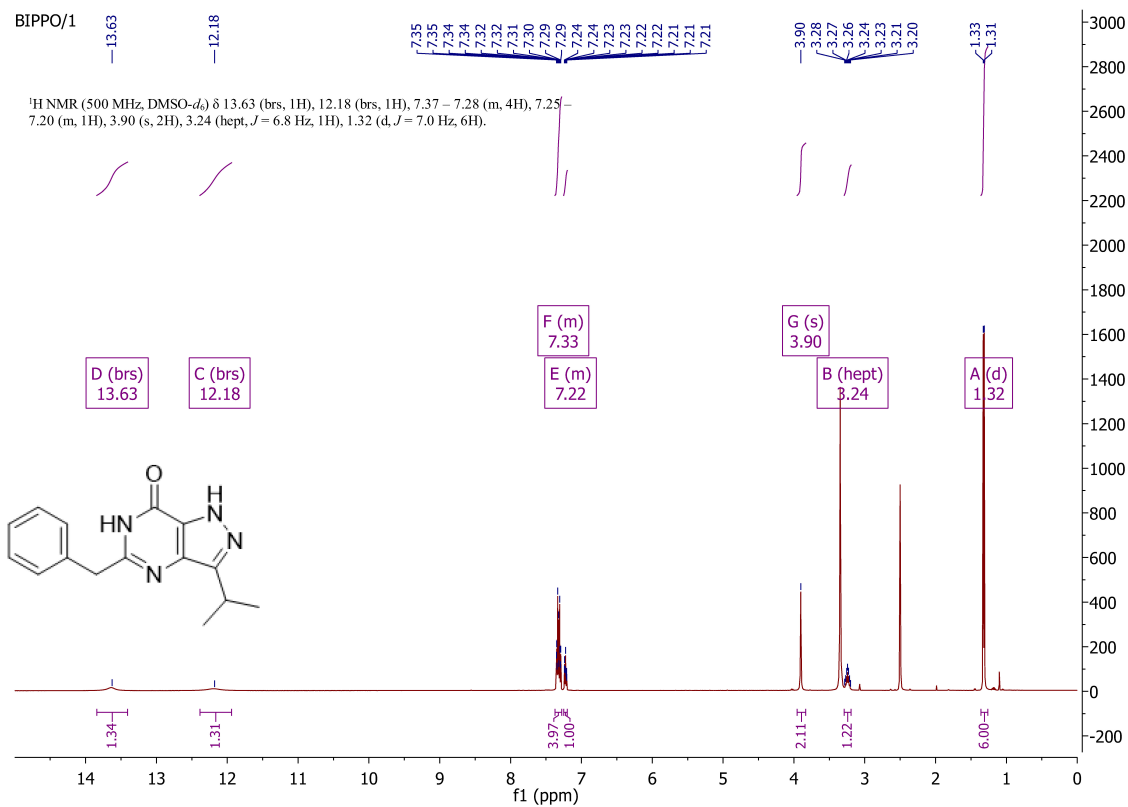

Figure S20.  $^1\text{H}$  NMR spectrum of compound 1 (NPD-0019).

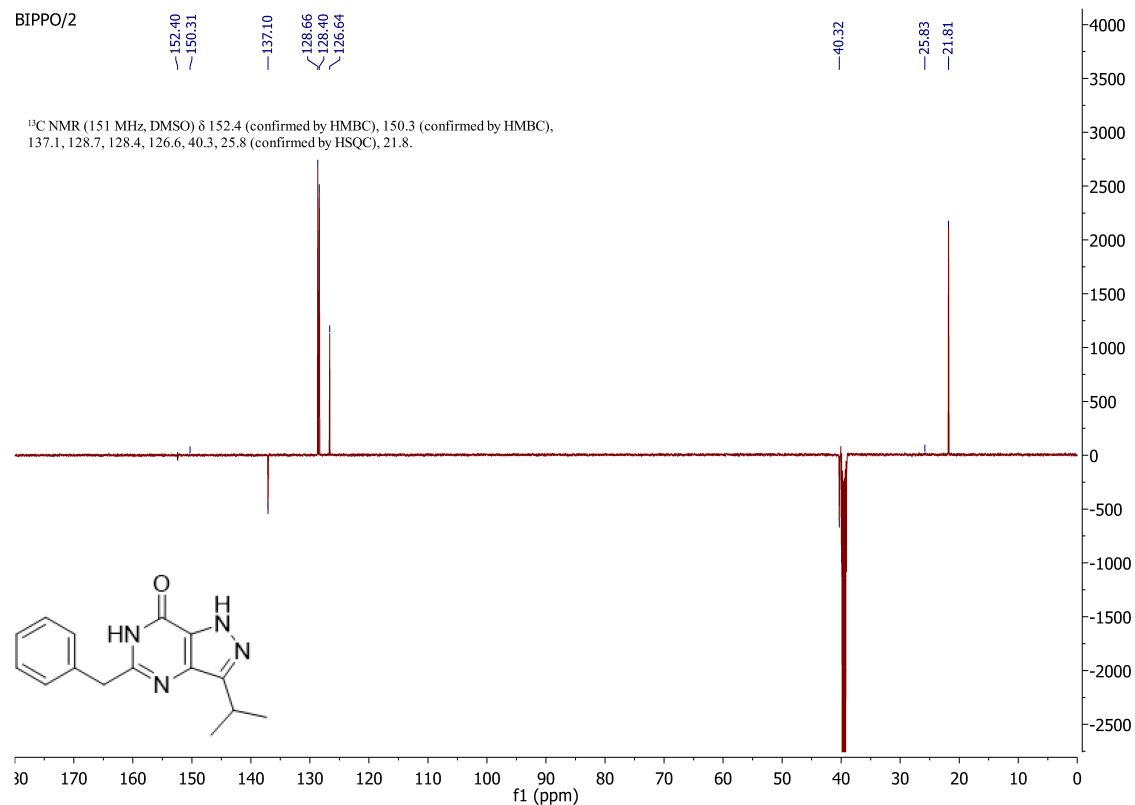

Figure S21.  $^{13}\text{C}$  NMR spectrum of compound 1 (NPD-0019).

Acquired by : Admin  
 Date Acquired : 4/20/2016 2:03:12 PM  
 Sample Name : YAZH-115  
 Sample ID :  
 Tray# : 1  
 Vial# : 33  
 Injection Volume : 1  
 Data File : C:\LabSolutions\Data\2016 - wk16\YAZH-115.lcd  
 Background File : blanco 20042016.lcd  
 Method File : Method SCAN ACID standard.lcm  
 Report Format : Default1.CMS.lcr  
 Tuning File : C:\LabSolutions\Tuning\Tuning-ESI-pos-neg01072015a.lct  
 Processed by : Admin  
 Modified Date : 4/20/2016 2:22:13 PM

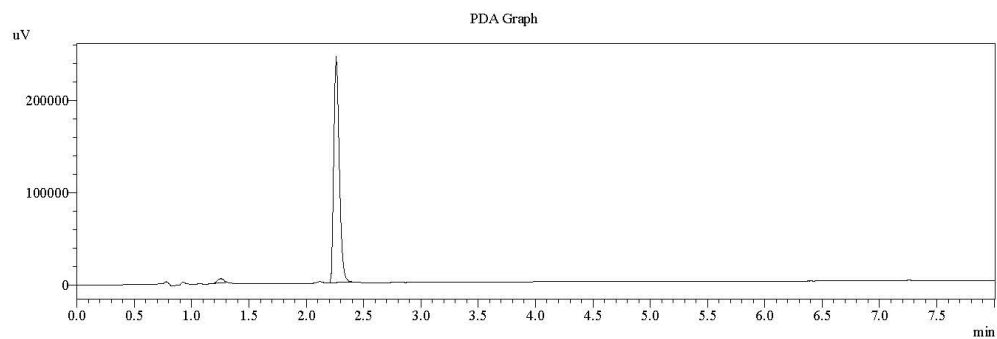

PDA Ch1 254nm 4nm

| Peak# | Name | Ret. Time | Area   | Area % |
|-------|------|-----------|--------|--------|
| 1     |      | 1.249     | 17766  | 2.151  |
| 2     |      | 2.257     | 808015 | 97.849 |

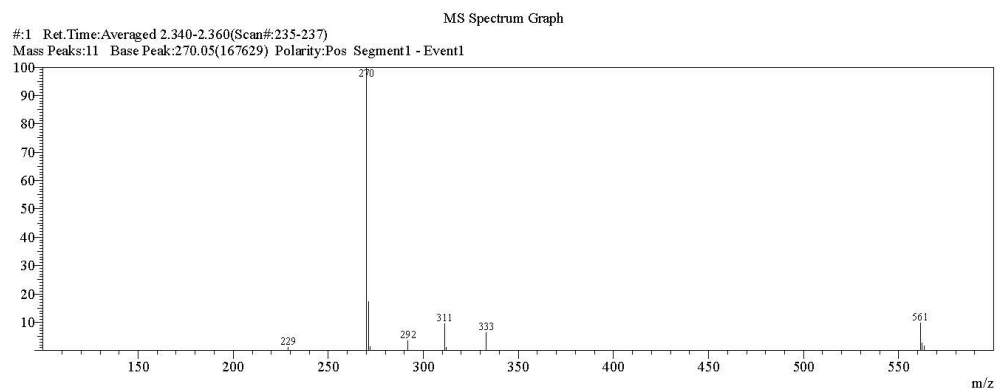

MS Spectrum Table

#1 Ret.Time:  
 BG Mode:Calc 2.250<->2.510(226<->252)  
 Mass Peaks:11 Base Peak:270.05(167629) Polarity:Pos Segment1 - Event1

| # | m/z    | Abs.Inten. | Rel.Inten. | Charge | Polarity | Monoisotopic | #  | m/z    | Abs.Inten. | Rel.Inten. | Charge | Polarity | Monoisotopic |
|---|--------|------------|------------|--------|----------|--------------|----|--------|------------|------------|--------|----------|--------------|
| 1 | 228.95 | 2033       | 1.21       |        |          |              | 7  | 312.20 | 1915       | 1.14       |        |          |              |
| 2 | 270.05 | 167629     | 100.00     |        |          |              | 8  | 333.15 | 10548      | 6.29       |        |          |              |
| 3 | 271.10 | 28885      | 17.23      |        |          |              | 9  | 561.30 | 16070      | 9.59       |        |          |              |
| 4 | 272.15 | 2103       | 1.25       |        |          |              | 10 | 562.20 | 4684       | 2.79       |        |          |              |
| 5 | 292.00 | 5834       | 3.48       |        |          |              | 11 | 563.35 | 2637       | 1.57       |        |          |              |
| 6 | 311.10 | 15897      | 9.48       |        |          |              |    |        |            |            |        |          |              |

Figure S22. LCMS spectrum of compound 9 (NPD-2960).

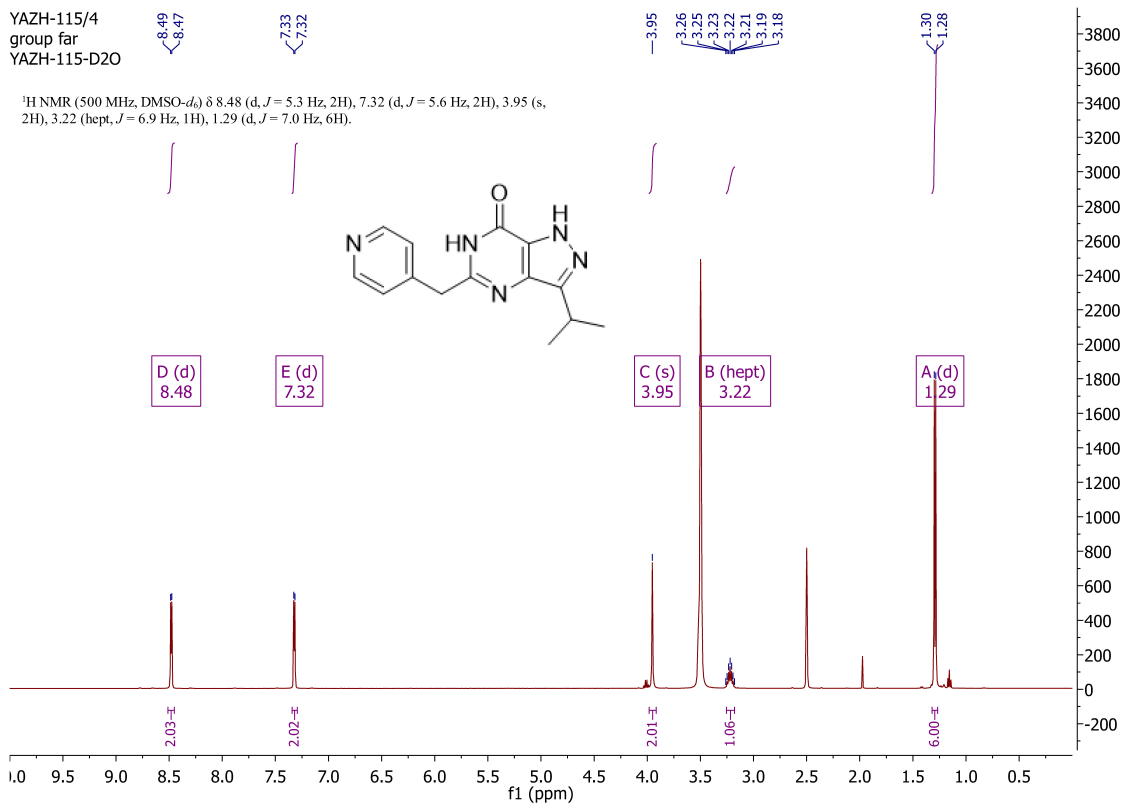

Figure S23.  $^1\text{H NMR}$  spectrum of compound 9 (NPD-2960).

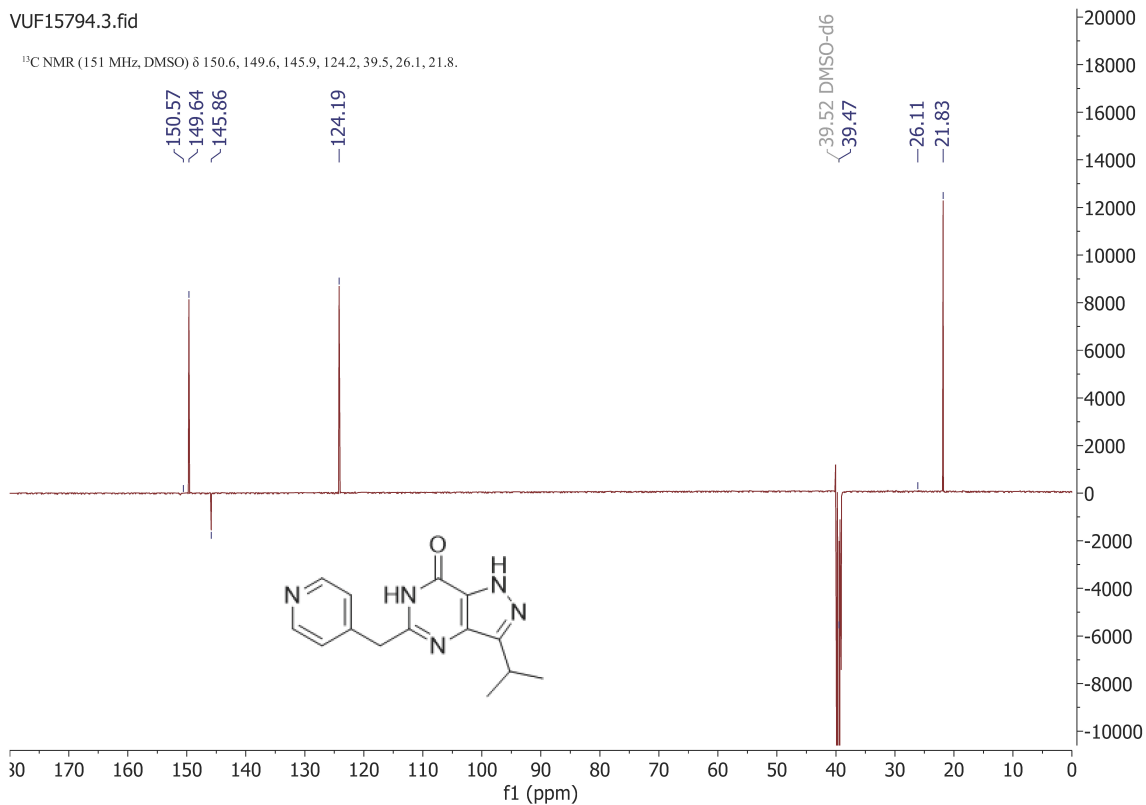

Figure S24.  $^{13}\text{C NMR}$  spectrum of compound 9 (NPD-2960).

Acquired by : Admin  
 Date Acquired : 18/5/2020 10:17:40 AM  
 Sample Name : VUF14762  
 Sample ID :  
 Tray# : 1  
 Vial# : 2  
 Injection Volume : 5  
 Data File : C:\LabSolutions\Data\2020\2020-wk21\VUF14762.lcd  
 Background File : blanco18052020.lcd  
 Method File : Method SCAN ACID standard.lcm  
 Report Format : DefaultLCMS1cr  
 Tuning File : C:\LabSolutions\Tuning\Tuning-ESI-pos-neg01072015a1ct  
 Processed by : Admin  
 Modified Date : 18/5/2020 11:40:37 AM

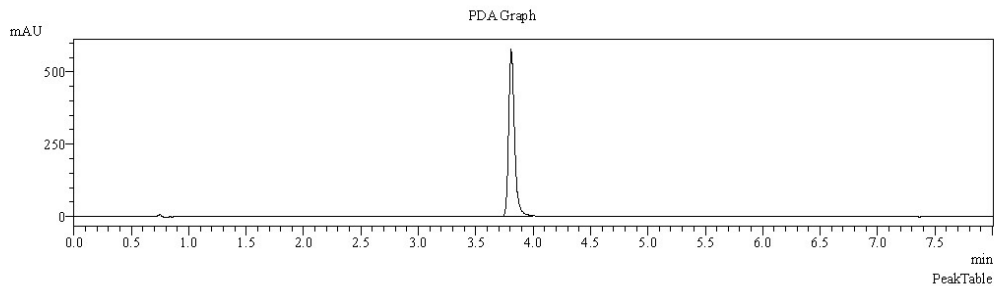

| Peak# | Name | Ret. Time | Area    | Area %  |
|-------|------|-----------|---------|---------|
| 1     |      | 3.804     | 2001393 | 100.000 |

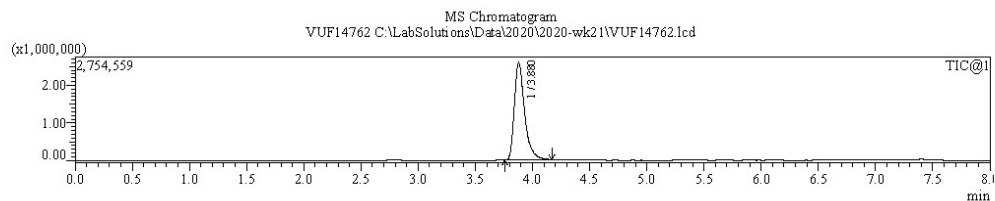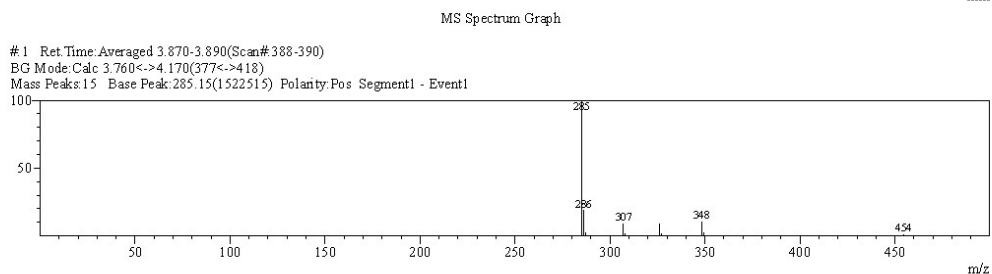

MS Spectrum Table

#1 Ret. Time:  
 BG Mode: Calc 3.760<->4.170 (377<->418)  
 Mass Peaks: 15 Base Peak: 285.15 (1522515) Polarity: Pos Segment1 - Event1

| # | m/z    | Abs.Inten. | Rel.Inten. | Charge | Polarity | Monoisotopic | #  | m/z    | Abs.Inten. | Rel.Inten. | Charge | Polarity | Monoisotopic |
|---|--------|------------|------------|--------|----------|--------------|----|--------|------------|------------|--------|----------|--------------|
| 1 | 285.15 | 1522515    | 100.00     |        |          |              | 9  | 349.25 | 36134      | 2.37       |        |          |              |
| 2 | 286.15 | 289149     | 18.99      |        |          |              | 10 | 454.55 | 16442      | 1.08       |        |          |              |
| 3 | 287.15 | 29062      | 1.91       |        |          |              | 11 | 591.40 | 46174      | 3.03       |        |          |              |
| 4 | 307.15 | 136443     | 8.96       |        |          |              | 12 | 592.40 | 15798      | 1.04       |        |          |              |
| 5 | 308.15 | 26916      | 1.77       |        |          |              | 13 | 596.40 | 26961      | 1.77       |        |          |              |
| 6 | 326.20 | 128833     | 8.46       |        |          |              | 14 | 596.70 | 48665      | 3.20       |        |          |              |
| 7 | 327.20 | 27427      | 1.80       |        |          |              | 15 | 597.75 | 22692      | 1.49       |        |          |              |
| 8 | 348.15 | 158628     | 10.42      |        |          |              |    |        |            |            |        |          |              |

Figure S25. LCMS spectrum of compound **10** (NPD-0434).



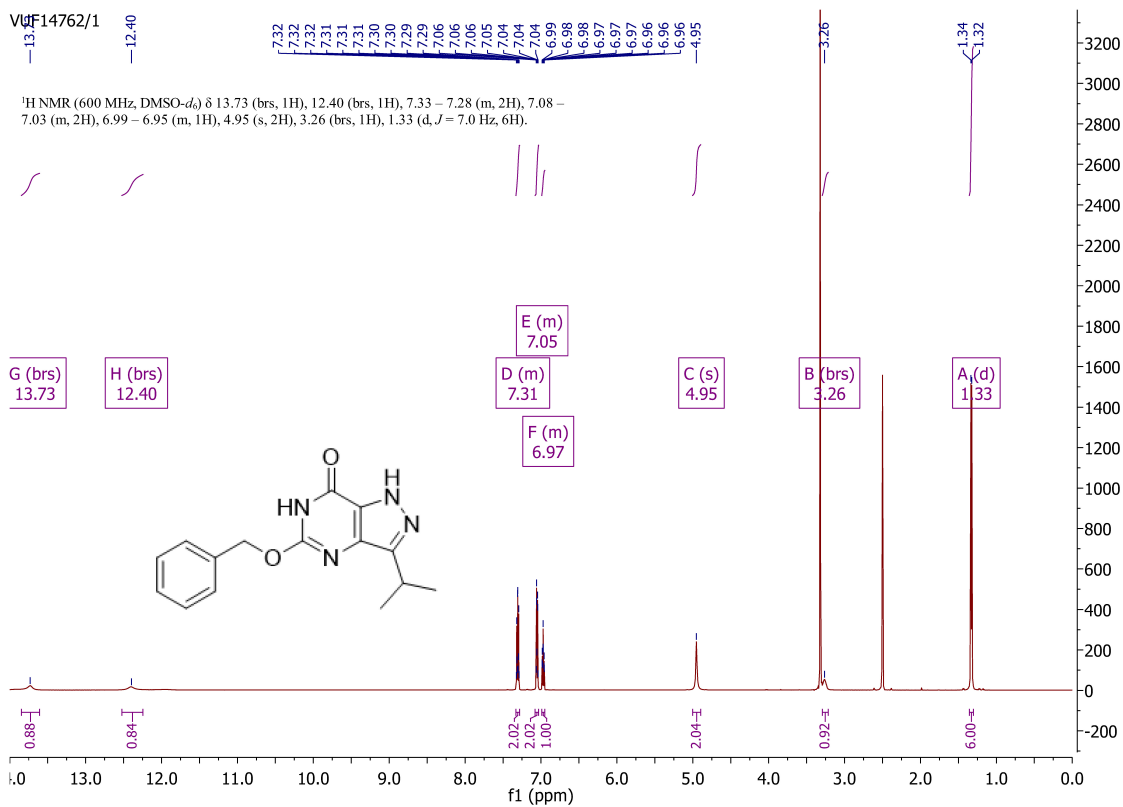

Figure S26. <sup>1</sup>H NMR spectrum of compound 10 (NPD-0434).

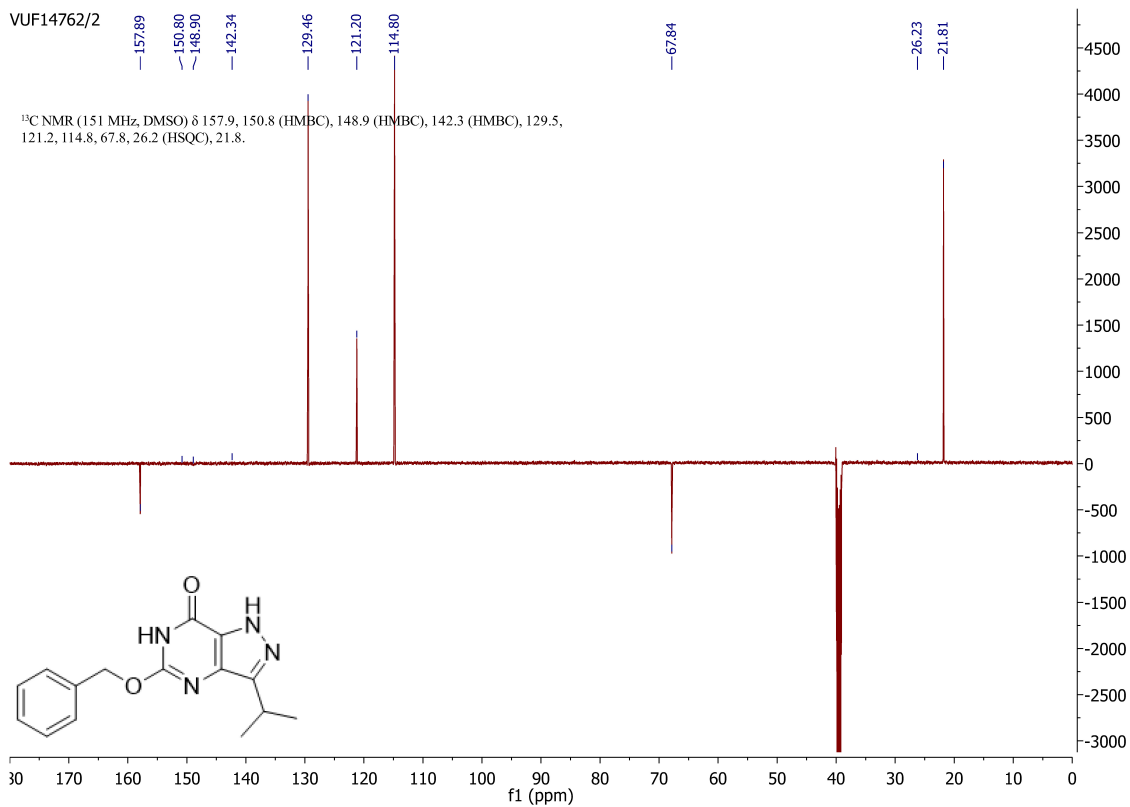

Figure S27. <sup>13</sup>C NMR spectrum of compound 10 (NPD-0434).

Acquired by : Admin  
 Date Acquired : 13/12/2017 1:15:35 PM  
 Sample Name : YAZH01-177-2  
 Sample ID :  
 Tray# : 1  
 Vial# : 14  
 Injection Volume : 3  
 Data File : C:\LabSolutions\Data\2017\2017-wk50\YAZH01-177-2.lcd  
 Background File : blanco 13122017.lcd  
 Method File : Method SCAN ACID standard1cm  
 Report Format : DefaultLCMS1cr  
 Tuning File : C:\LabSolutions\Tuning\Tuning-ESI-pos-neg01072015a1ct  
 Processed by : Admin  
 Modified Date : 13/12/2017 3:51:59 PM

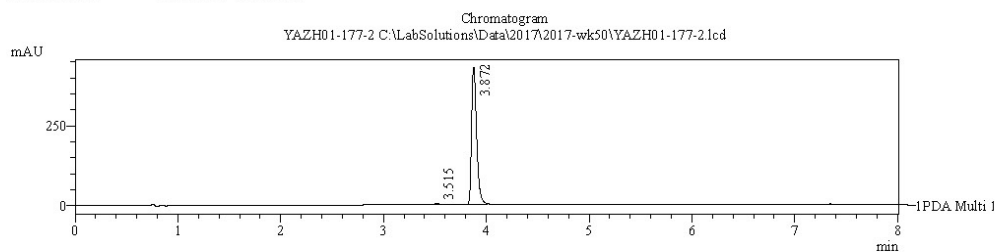

| Peak# | Name | Ret. Time | Area    | Area%  |
|-------|------|-----------|---------|--------|
| 1     |      | 3.515     | 10088   | 0.690  |
| 2     |      | 3.872     | 1451224 | 99.310 |

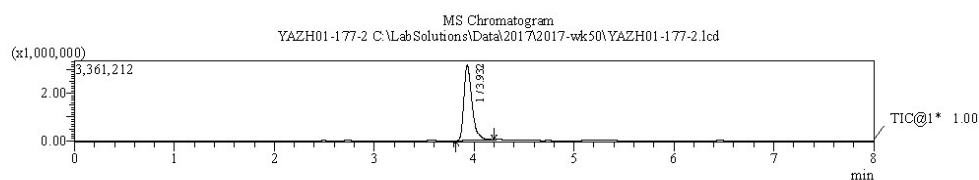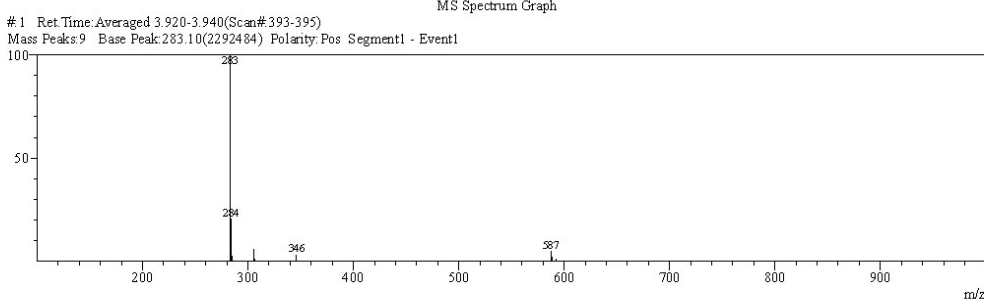

MS Spectrum Table

| # | m/z    | Abs.Inten. | Rel.Inten. | Charge | Polarity | Monoisotopic | # | m/z    | Abs.Inten. | Rel.Inten. | Charge | Polarity | Monoisotopic |
|---|--------|------------|------------|--------|----------|--------------|---|--------|------------|------------|--------|----------|--------------|
| 1 | 283.10 | 2292484    | 100.00     |        |          |              | 6 | 346.15 | 72424      | 3.16       |        |          |              |
| 2 | 284.10 | 466861     | 20.36      |        |          |              | 7 | 587.30 | 112077     | 4.89       |        |          |              |
| 3 | 285.15 | 56524      | 2.47       |        |          |              | 8 | 588.30 | 42963      | 1.87       |        |          |              |
| 4 | 305.10 | 128110     | 5.59       |        |          |              | 9 | 592.40 | 30587      | 1.33       |        |          |              |
| 5 | 306.10 | 23597      | 1.03       |        |          |              |   |        |            |            |        |          |              |

Figure S28. LCMS spectrum of compound 11 (NPD-3281).

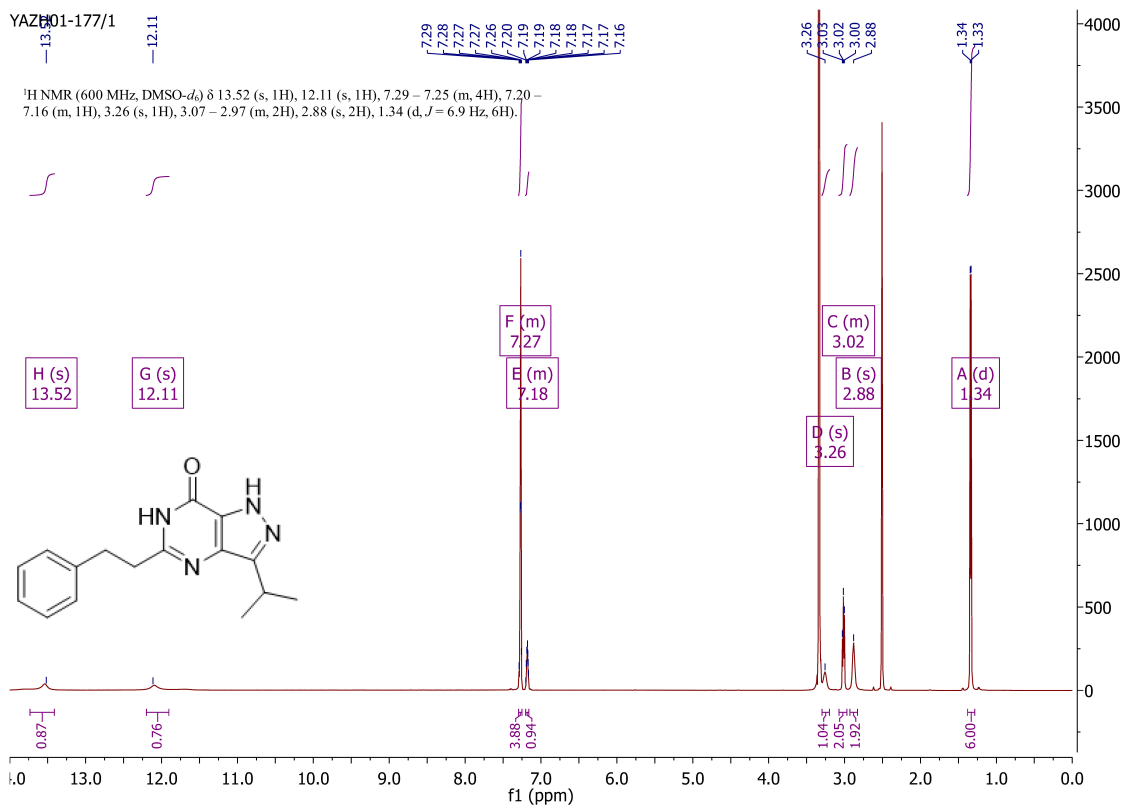

Figure S29. <sup>1</sup>H NMR spectrum of compound **11** (NPD-3281).

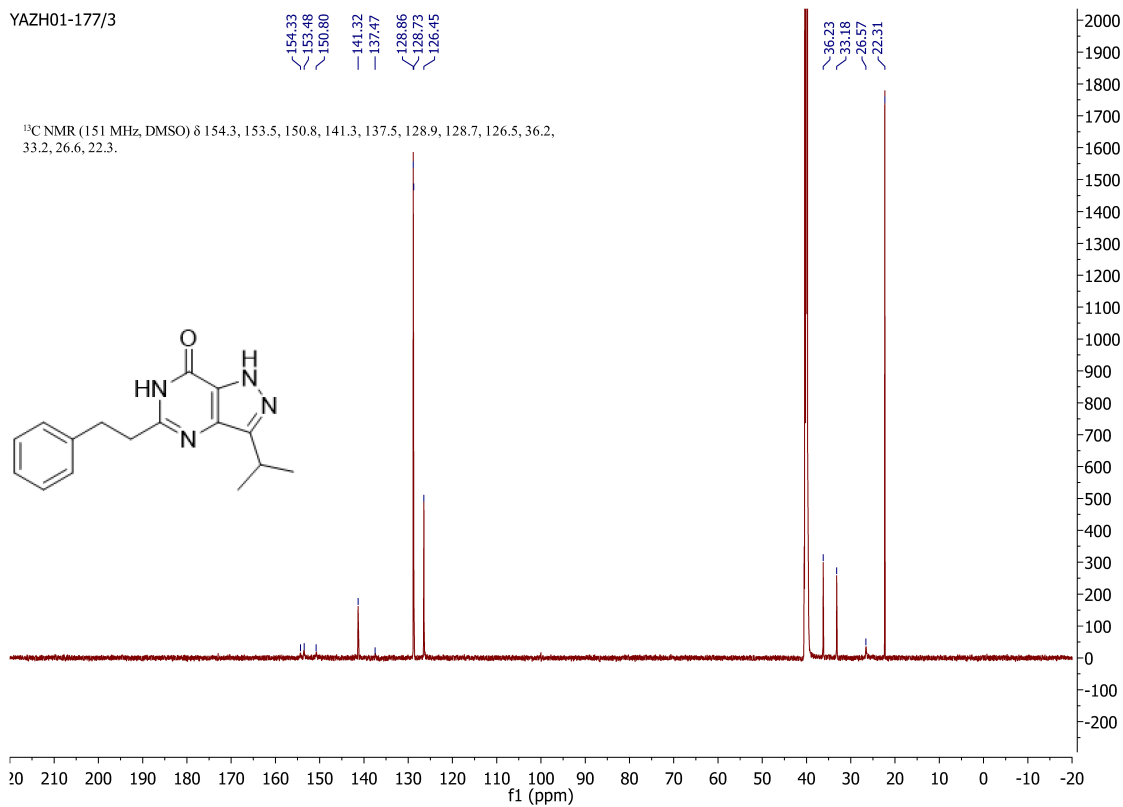

Figure S30. <sup>13</sup>C NMR spectrum of compound **11** (NPD-3281).

Acquired by : Adman  
 Date Acquired : 19/4/2018 1:51:00 PM  
 Sample Name : YAZH01-204  
 Sample ID :  
 Tray# : 1  
 Vial# : 19  
 Injection Volume : 4  
 Data File : C:\LabSolutions\Data\2018\2018-wk16\YAZH01-204.lcd  
 Background File : blanco 19042018.lcd  
 Method File : Method SCAN.ACID.standard.lcm  
 Report Format : DefaultLCMS.lcr  
 Tuning File : C:\LabSolutions\Tuning\Tuning-ESI-pos-neg01072015a.lct  
 Processed by : Adman  
 Modified Date : 19/4/2018 3:41:19 PM

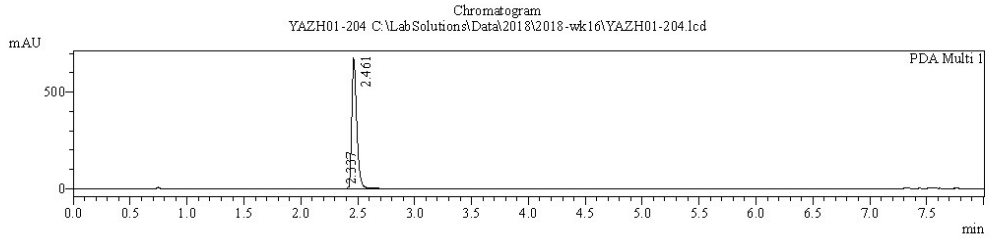

PeakTable

| Peak# | Name | Ret. Time | Area    | Area % |
|-------|------|-----------|---------|--------|
| 1     |      | 2.337     | 446     | 0.022  |
| 2     |      | 2.461     | 2042814 | 99.978 |

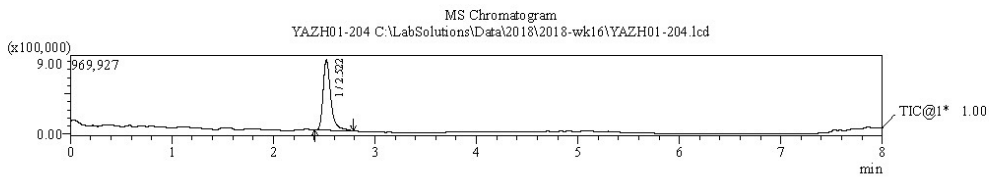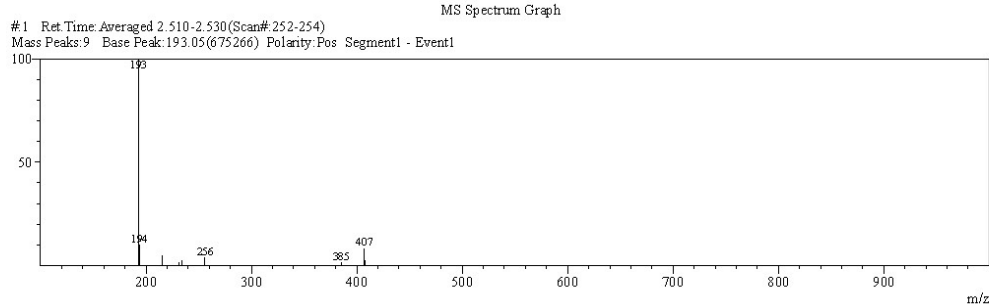

MS Spectrum Table

| # | m/z    | Abs.Inten. | Rel.Inten. | Charge | Polarity | Monoisotopic |
|---|--------|------------|------------|--------|----------|--------------|
| 1 | 193.05 | 675266     | 100.00     |        |          |              |
| 2 | 194.05 | 65587      | 9.71       |        |          |              |
| 3 | 215.00 | 32079      | 4.75       |        |          |              |
| 4 | 231.00 | 8680       | 1.29       |        |          |              |
| 5 | 234.05 | 16383      | 2.43       |        |          |              |
| 6 | 256.05 | 24769      | 3.67       |        |          |              |
| 7 | 385.05 | 9084       | 1.35       |        |          |              |
| 8 | 407.15 | 55292      | 8.19       |        |          |              |
| 9 | 408.15 | 15853      | 2.35       |        |          |              |

Figure S31. LCMS spectrum of compound 12 (NPD-3380).

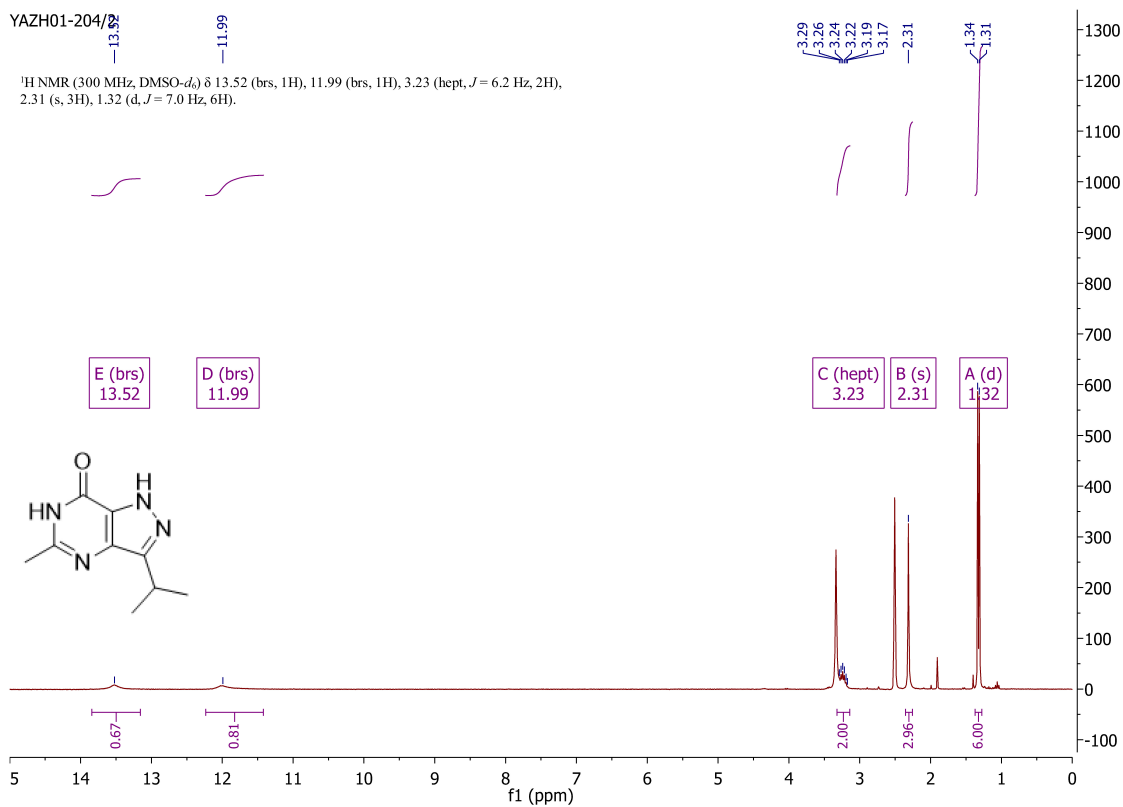

Figure S32. <sup>1</sup>H NMR spectrum of compound **12** (NPD-3380).

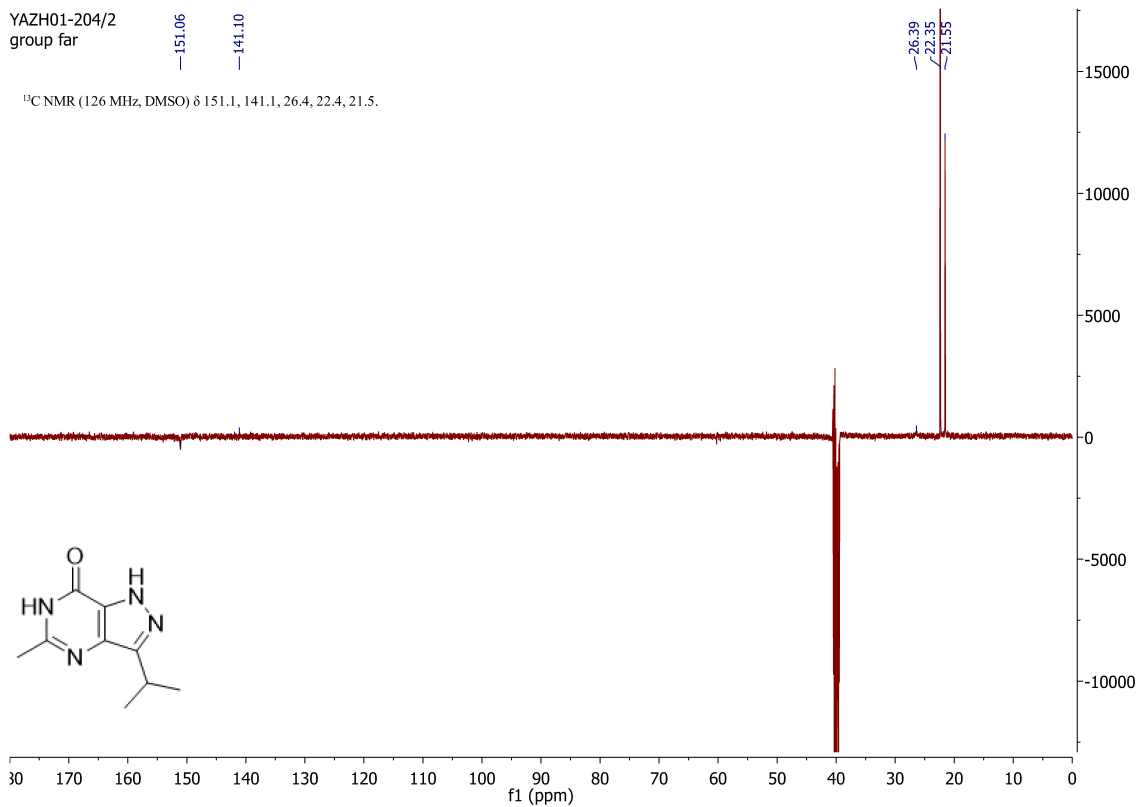

Figure S33. <sup>13</sup>C NMR spectrum of compound **12** (NPD-3380).

Acquired by : Admin  
 Date Acquired : 1/4/2019 11:04:28 AM  
 Sample Name : YAZH\_39  
 Sample ID :  
 Tray# : 1  
 Vial# : 8  
 Injection Volume : 3  
 Data File : C:\Lab Solutions\Data\2019\2019-wk14\YAZH\_391cd  
 Background File : blanco 010420191cd  
 Method File : Method SCAN ACID standard.lcm  
 Report Format : DefaultLCMS.lcr  
 Tuning File : C:\Lab Solutions\Tuning\Tuning-ESI-pos-neg01072015a.lct  
 Processed by : Admin  
 Modified Date : 1/4/2019 11:34:36 AM

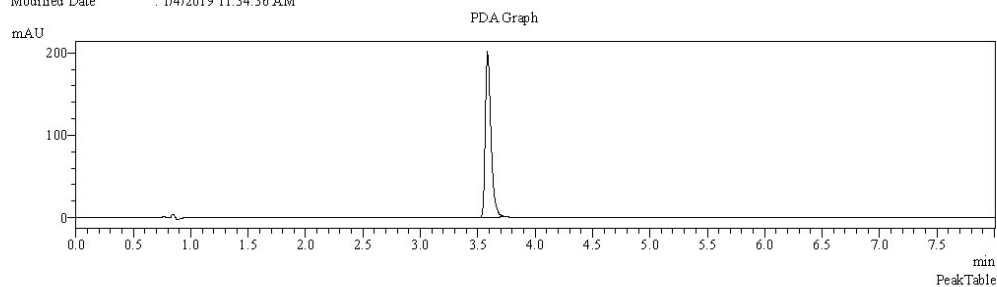

PDA Ch1 254nm 4nm

| Peak# | Name | Ret. Time | Area   | Area%   |
|-------|------|-----------|--------|---------|
| 1     |      | 3.581     | 688185 | 100.000 |

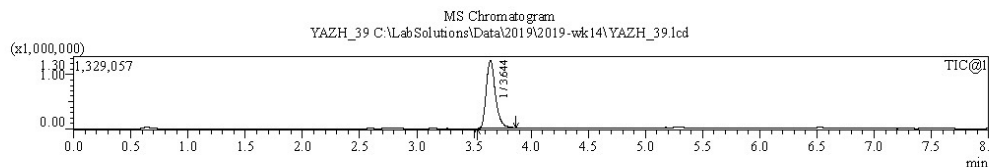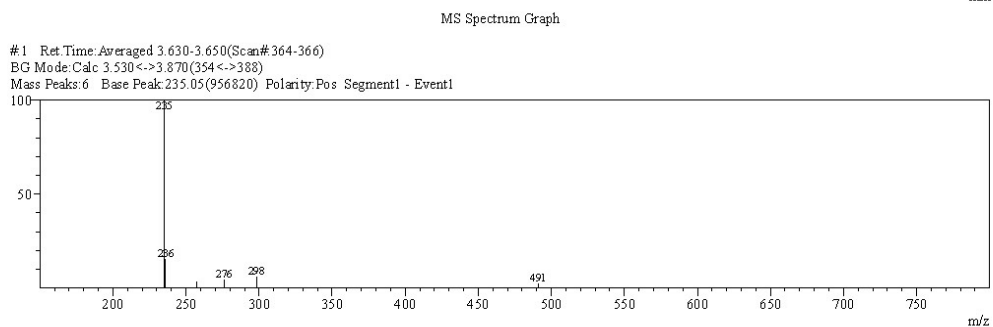

MS Spectrum Table

#1 Ret.Time:  
 BG Mode: Calc 3.530<->3.870(354<->388)  
 Mass Peaks: 6 Base Peak: 235.05(956820) Polarity: Pos Segment1 - Event1

| # | m/z    | Abs.Inten. | Rel.Inten. | Charge | Polarity | Monoisotopic | # | m/z    | Abs.Inten. | Rel.Inten. | Charge | Polarity | Monoisotopic |
|---|--------|------------|------------|--------|----------|--------------|---|--------|------------|------------|--------|----------|--------------|
| 1 | 235.05 | 956820     | 100.00     |        |          |              | 4 | 276.10 | 38169      | 3.99       |        |          |              |
| 2 | 236.05 | 144245     | 15.08      |        |          |              | 5 | 298.10 | 56634      | 5.92       |        |          |              |
| 3 | 257.10 | 31609      | 3.30       |        |          |              | 6 | 491.30 | 21946      | 2.29       |        |          |              |

Figure S34. LCMS spectrum of compound **13** (NPD-3645).

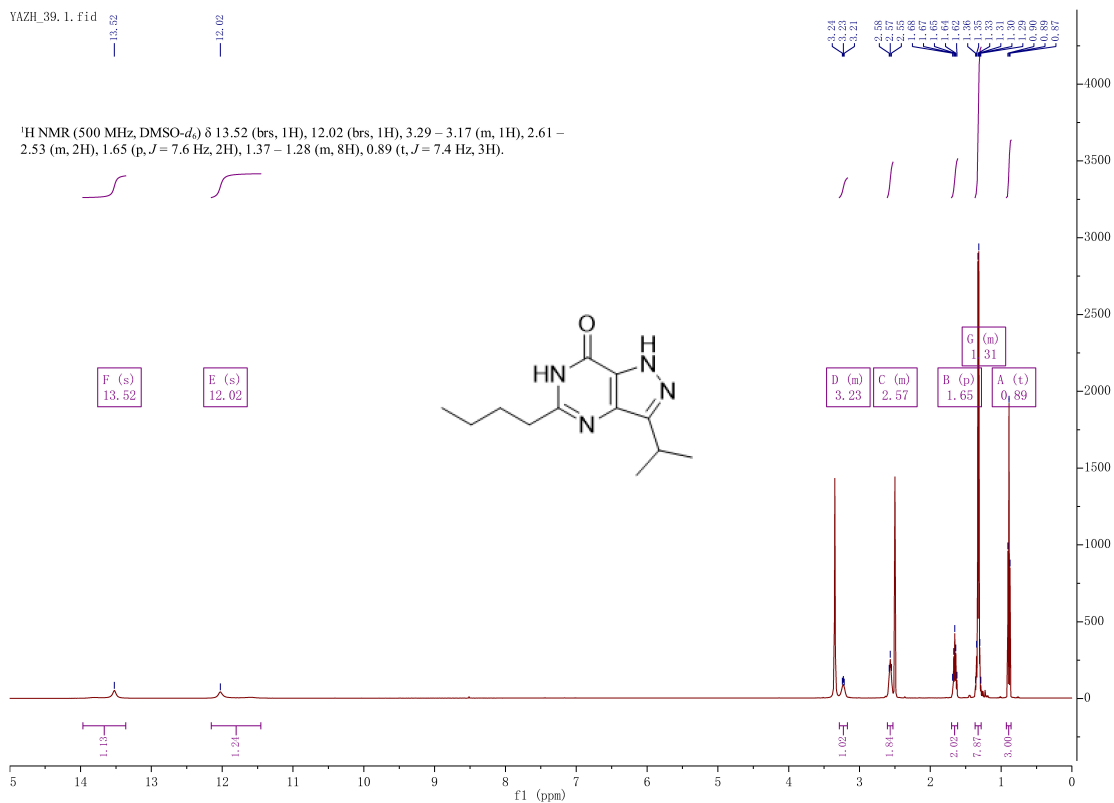

Figure S35. <sup>1</sup>H NMR spectrum of compound 13 (NPD-3645).

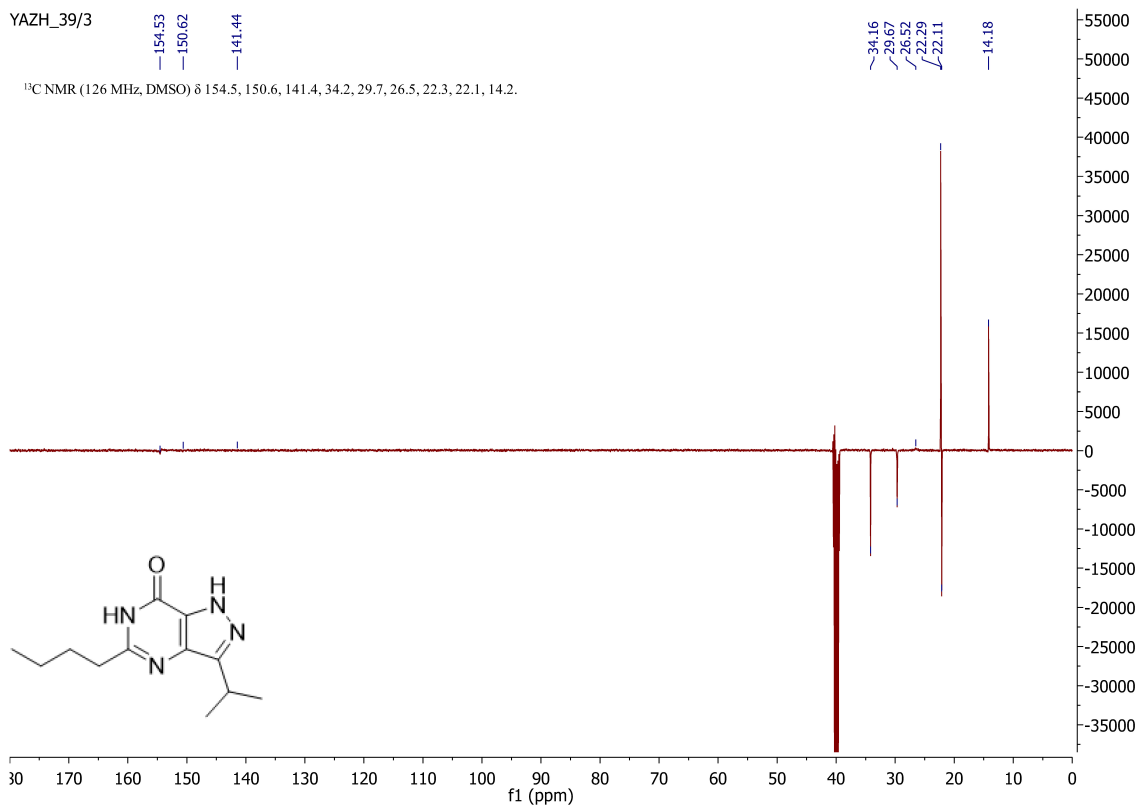

Figure S36. <sup>13</sup>C NMR spectrum of compound 13 (NPD-3645).

Acquired by : Admin  
 Date Acquired : 19/4/2018 12:59:05 PM  
 Sample Name : YAZH01-203-1  
 Sample ID :  
 Tray# : 1  
 Vial# : 28  
 Injection Volume : 4  
 Data File : C:\LabSolutions\Data\2018\2018-wk16\YAZH01-203-11.cld  
 Background File : blanco\_19042018.lcd  
 Method File : Method SCAN.ACID.standard.lcm  
 Report Format : DefaultLCMS.lcr  
 Tuning File : C:\LabSolutions\Tuning\Tuning-ESI-pos-neg01072015a.lct  
 Processed by : Admin  
 Modified Date : 19/4/2018 1:10:48 PM

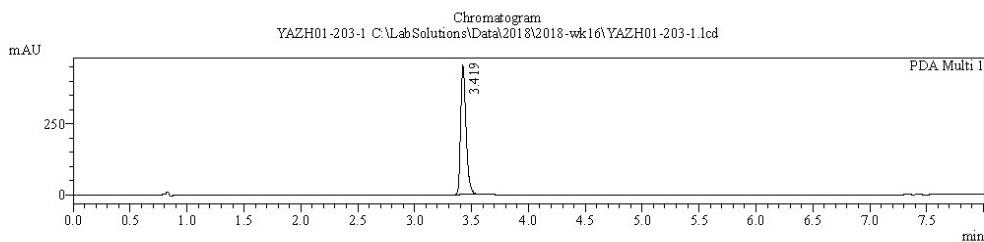

PeakTable

| Peak# | Name | Ret. Time | Area    | Area%   |
|-------|------|-----------|---------|---------|
| 1     |      | 3.419     | 1470710 | 100.000 |

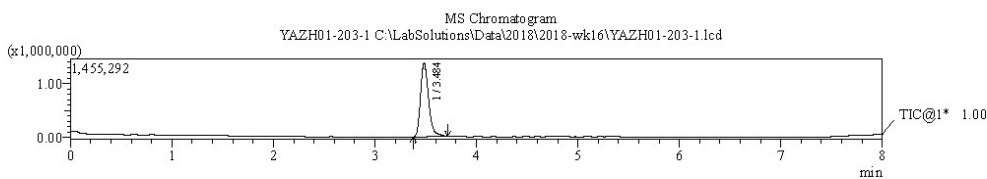

MS Spectrum Graph

#1 Ret. Time: Averaged 3.470-3.490 (Scan# 348-350)  
 Mass Peaks: 8 Base Peak: 221.10(1031293) Polarity: Pos Segment1 - Event1

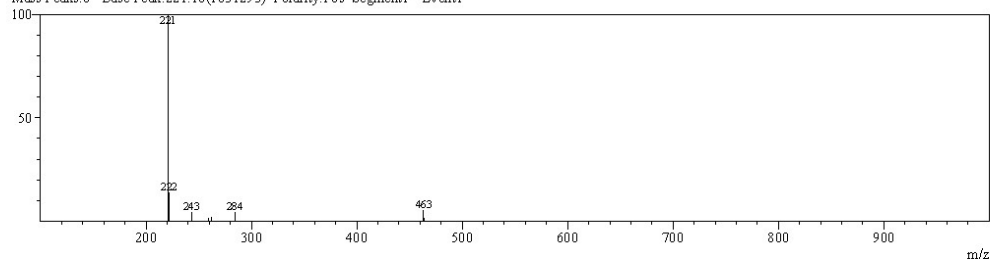

MS Spectrum Table

#1 Ret. Time:  
 BG Mode: Calc 3.380<->3.720(339<->373)  
 Mass Peaks: 8 Base Peak: 221.10(1031293) Polarity: Pos Segment1 - Event1

| # | m/z    | Abs.Inten. | Rel.Inten. | Charge | Polarity | Monoisotopic | # | m/z    | Abs.Inten. | Rel.Inten. | Charge | Polarity | Monoisotopic |
|---|--------|------------|------------|--------|----------|--------------|---|--------|------------|------------|--------|----------|--------------|
| 1 | 221.10 | 1031293    | 100.00     |        |          |              | 5 | 262.05 | 20613      | 2.00       |        |          |              |
| 2 | 222.05 | 140359     | 13.61      |        |          |              | 6 | 284.10 | 42671      | 4.14       |        |          |              |
| 3 | 243.00 | 41841      | 4.06       |        |          |              | 7 | 463.25 | 50815      | 4.93       |        |          |              |
| 4 | 259.10 | 11590      | 1.12       |        |          |              | 8 | 464.20 | 15306      | 1.48       |        |          |              |

Figure S37. LCMS spectrum of compound 14 (NPD-3379).



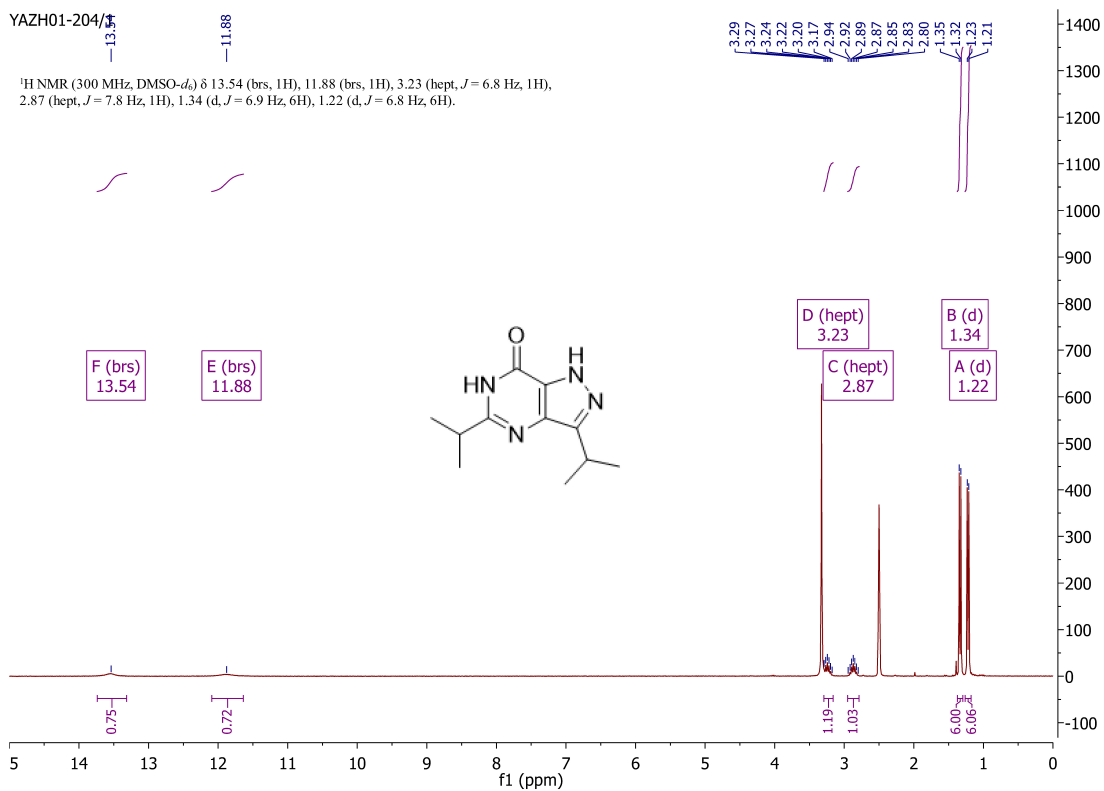

Figure S38.  $^1\text{H NMR}$  spectrum of compound **14** (NPD-3379).

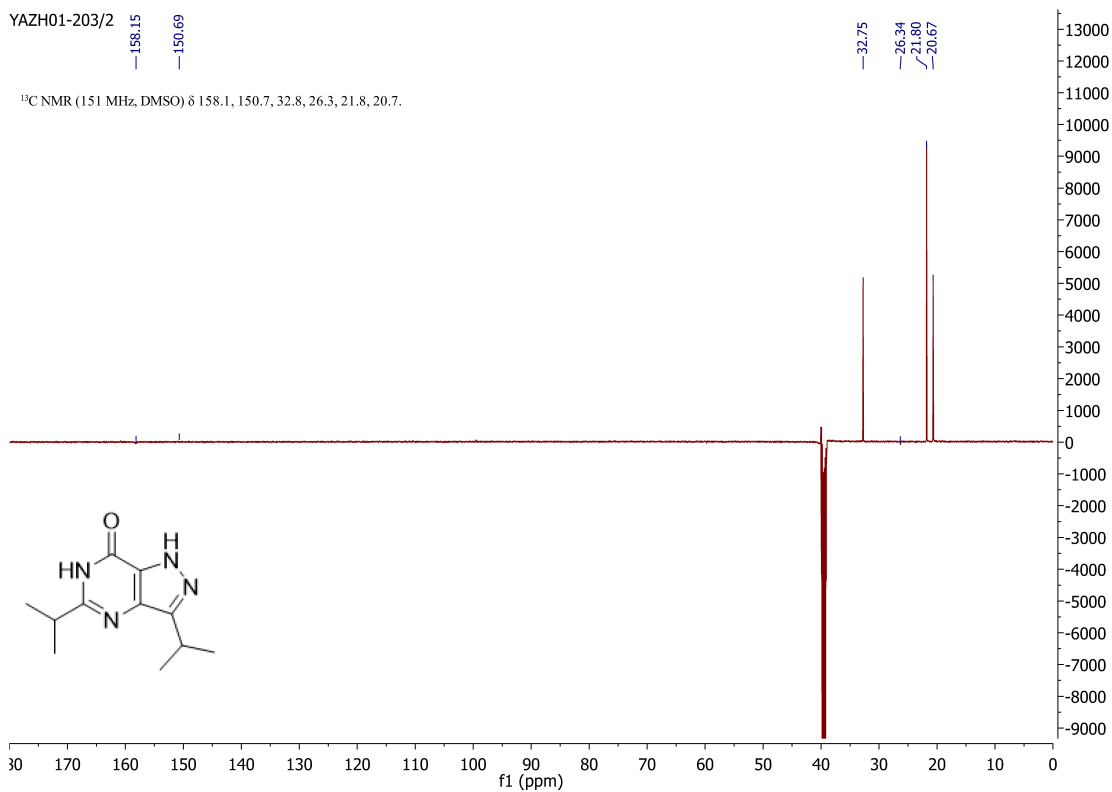

Figure S39.  $^{13}\text{C NMR}$  spectrum of compound **14** (NPD-3379).

Acquired by : Admin  
 Date Acquired : 7/14/2017 4:35:06 PM  
 Sample Name : YAZH01-116  
 Sample ID :  
 Tray# : 1  
 Vial# : 28  
 Injection Volume : 10  
 Data File : C:\LabSolutions\Data\2017\2017-wk28\YAZH01-116.lcd  
 Background File : BLANCO\_14072017.lcd  
 Method File : Method SCAN ACID standard.lcm  
 Report Format : DefaultLCMS1.rpt  
 Tuning File : C:\LabSolutions\Tuning\Tuning-ESI-pos-neg01072015a.rpt  
 Processed by : Admin  
 Modified Date : 7/14/2017 5:24:01 PM

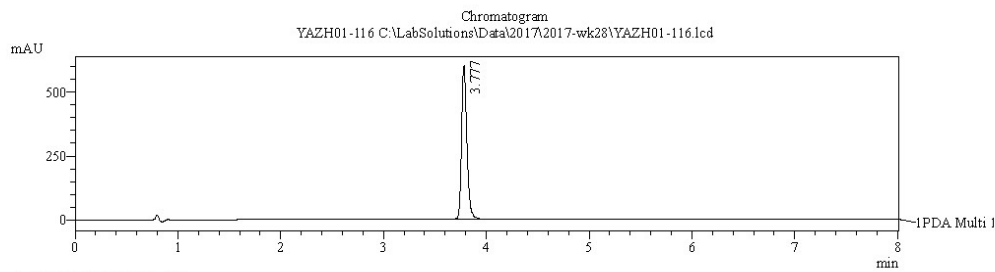

PeakTable

| Peak# | Name | Ret. Time | Area    | Area%   |
|-------|------|-----------|---------|---------|
| 1     |      | 3.777     | 2126142 | 100.000 |

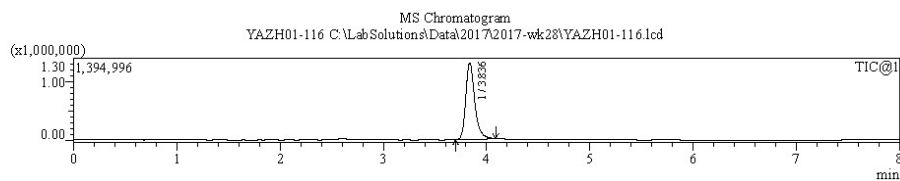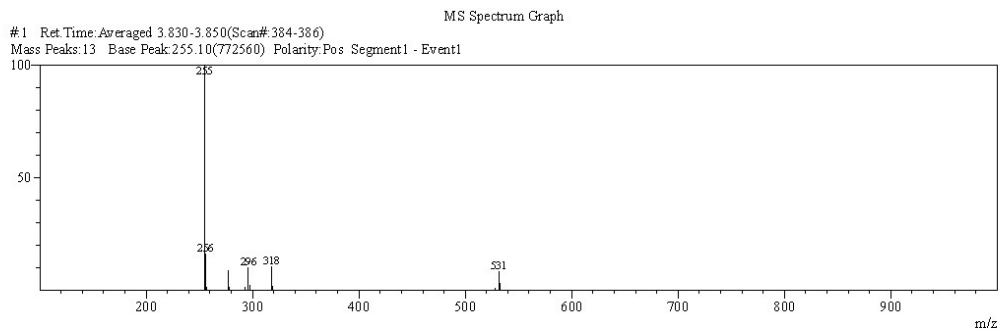

MS Spectrum Table

| # | m/z    | Abs.Inten. | Rel.Inten. | Charge | Polarity | Monoisotopic | #  | m/z    | Abs.Inten. | Rel.Inten. | Charge | Polarity | Monoisotopic |
|---|--------|------------|------------|--------|----------|--------------|----|--------|------------|------------|--------|----------|--------------|
| 1 | 255.10 | 772560     | 100.00     |        |          |              | 8  | 297.15 | 16084      | 2.08       |        |          |              |
| 2 | 256.10 | 125886     | 16.29      |        |          |              | 9  | 318.10 | 80834      | 10.46      |        |          |              |
| 3 | 257.10 | 10257      | 1.33       |        |          |              | 10 | 319.10 | 15800      | 2.05       |        |          |              |
| 4 | 277.10 | 66368      | 8.59       |        |          |              | 11 | 528.50 | 7861       | 1.02       |        |          |              |
| 5 | 278.10 | 9738       | 1.26       |        |          |              | 12 | 531.30 | 64127      | 8.30       |        |          |              |
| 6 | 293.00 | 11959      | 1.55       |        |          |              | 13 | 532.30 | 24020      | 3.11       |        |          |              |
| 7 | 296.10 | 76995      | 9.97       |        |          |              |    |        |            |            |        |          |              |

Figure S40. LCMS spectrum of compound 15 (NPD-3200).

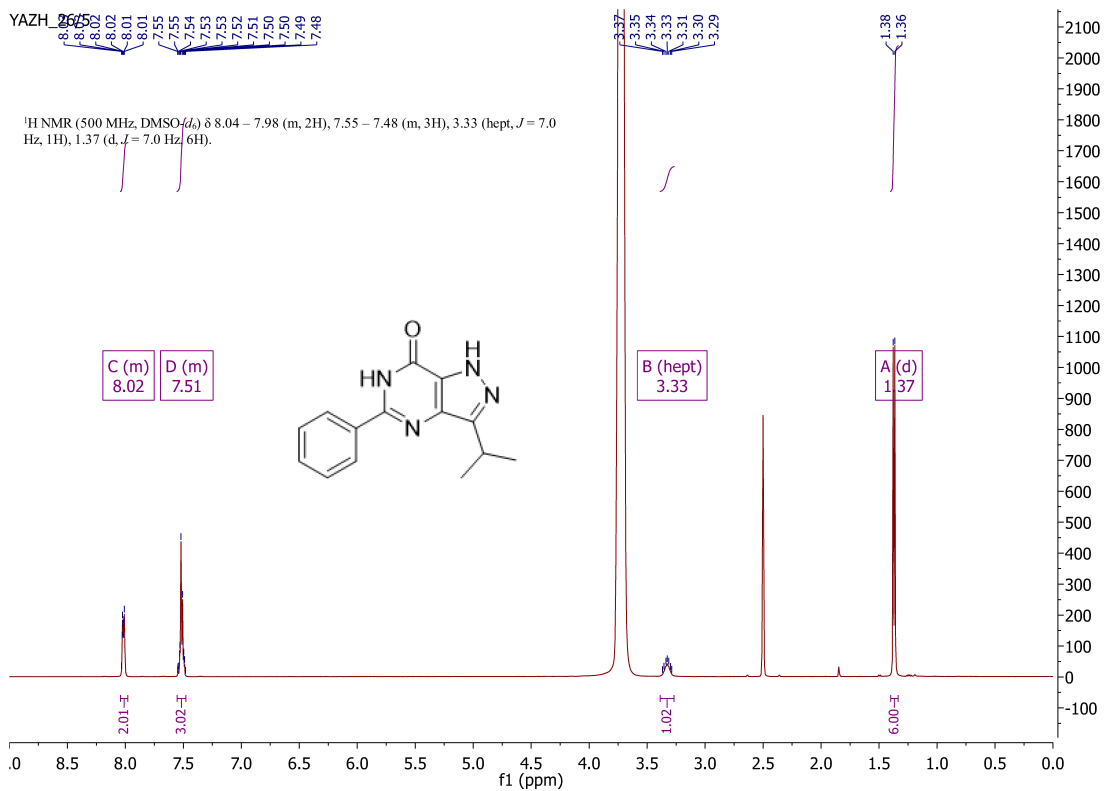

Figure S41. <sup>1</sup>H NMR spectrum of compound **15** (NPD-3200).

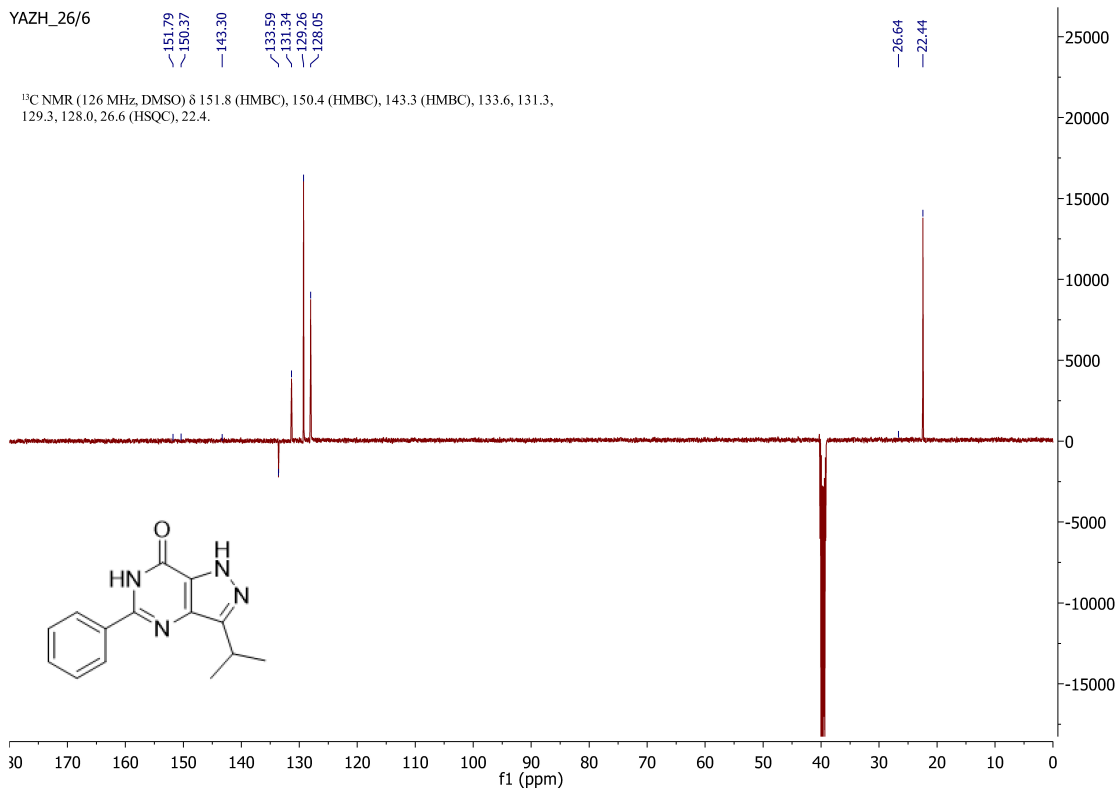

Figure S42. <sup>13</sup>C NMR spectrum of compound **15** (NPD-3200).

Acquired by : Admin  
 Date Acquired : 7/5/2018 1:29:57 PM  
 Sample Name : YAZH01-209  
 Sample ID :  
 Tray# : 1  
 Vial# : 25  
 Injection Volume : 3  
 Data File : C:\LabSolutions\Data\2018\2018-wk19\YAZH01-209.lcd  
 Background File : blanco\_070518.lcd  
 Method File : Method SCAN ACID standard.lcm  
 Report Format : DefaultL.CMS.lcr  
 Tuning File : C:\LabSolutions\Tuning\Tuning-ESI-pos-neg01072015a.lct  
 Processed by : Admin  
 Modified Date : 7/5/2018 1:54:47 PM

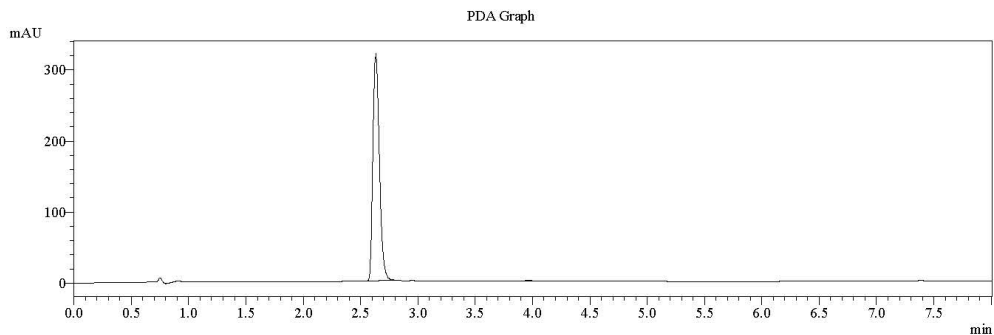

PDA Ch1 254nm 4nm

| Peak# | Name | Ret. Time | Area    | Area % |
|-------|------|-----------|---------|--------|
| 1     |      | 2.485     | 2629    | 0.207  |
| 2     |      | 2.627     | 1261672 | 99.458 |
| 3     |      | 3.961     | 4251    | 0.335  |

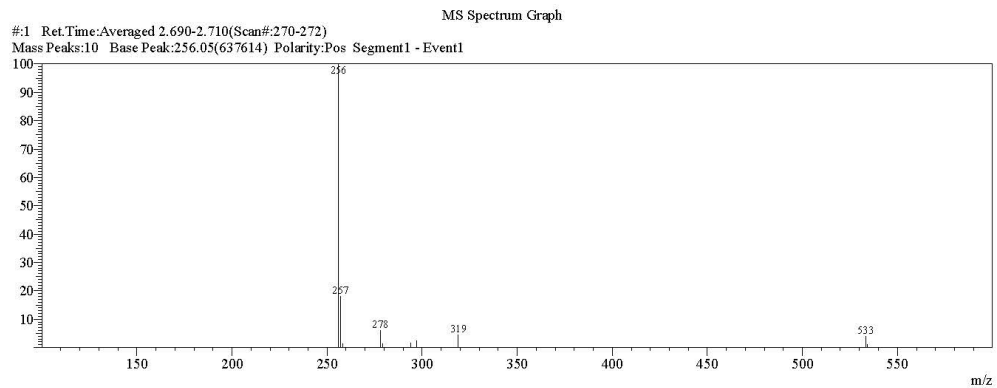

MS Spectrum Table

#1 Ret.Time:  
 BG Mode:Calc 2.580<->2.920(259<->293)  
 Mass Peaks:10 Base Peak:256.05(637614) Polarity:Pos Segment1 - Event1

| # | m/z    | Abs.Inten. | Rel.Inten. | Charge | Polarity | Monoisotopic | #  | m/z    | Abs.Inten. | Rel.Inten. | Charge | Polarity | Monoisotopic |
|---|--------|------------|------------|--------|----------|--------------|----|--------|------------|------------|--------|----------|--------------|
| 1 | 256.05 | 637614     | 100.00     |        |          |              | 6  | 294.10 | 9417       | 1.48       |        |          |              |
| 2 | 257.00 | 114485     | 17.96      |        |          |              | 7  | 297.15 | 15763      | 2.47       |        |          |              |
| 3 | 258.10 | 8195       | 1.29       |        |          |              | 8  | 319.05 | 28833      | 4.52       |        |          |              |
| 4 | 278.05 | 38614      | 6.06       |        |          |              | 9  | 533.25 | 24938      | 3.91       |        |          |              |
| 5 | 279.10 | 8815       | 1.38       |        |          |              | 10 | 534.20 | 7571       | 1.19       |        |          |              |

Figure S43. LCMS spectrum of compound **16** (NPD-3488).

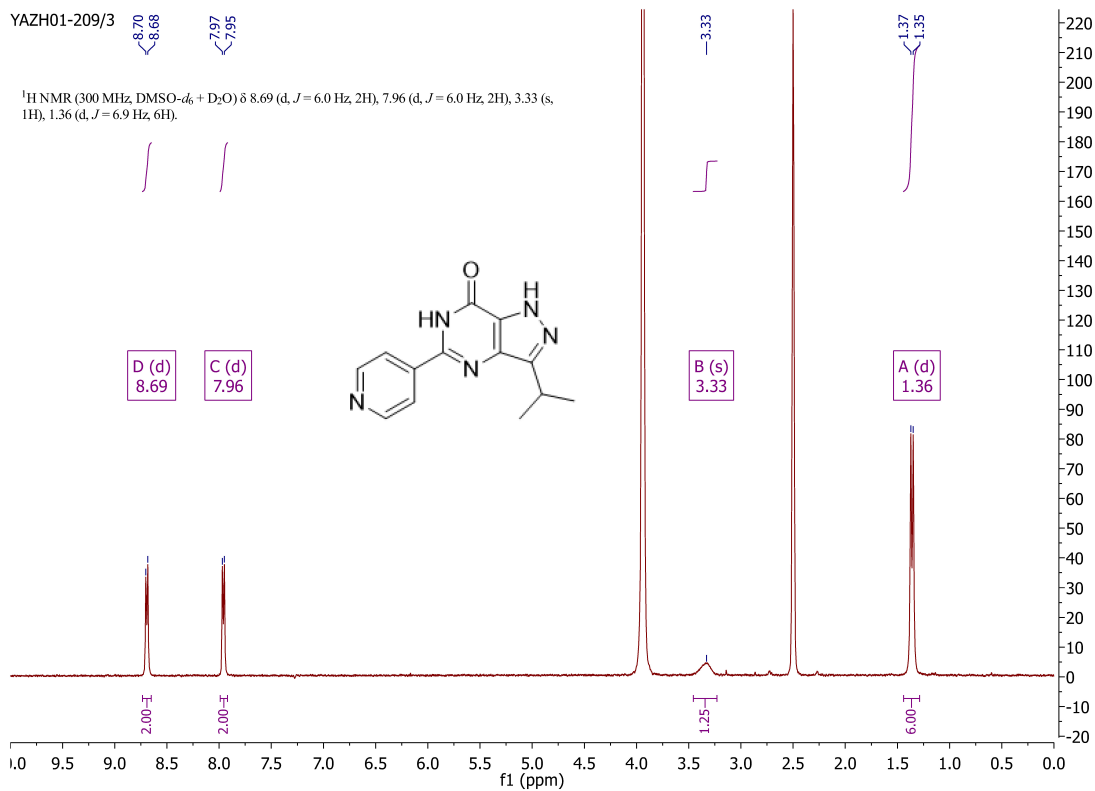

Figure S44. <sup>1</sup>H NMR spectrum of compound **16** (NPD-3488).

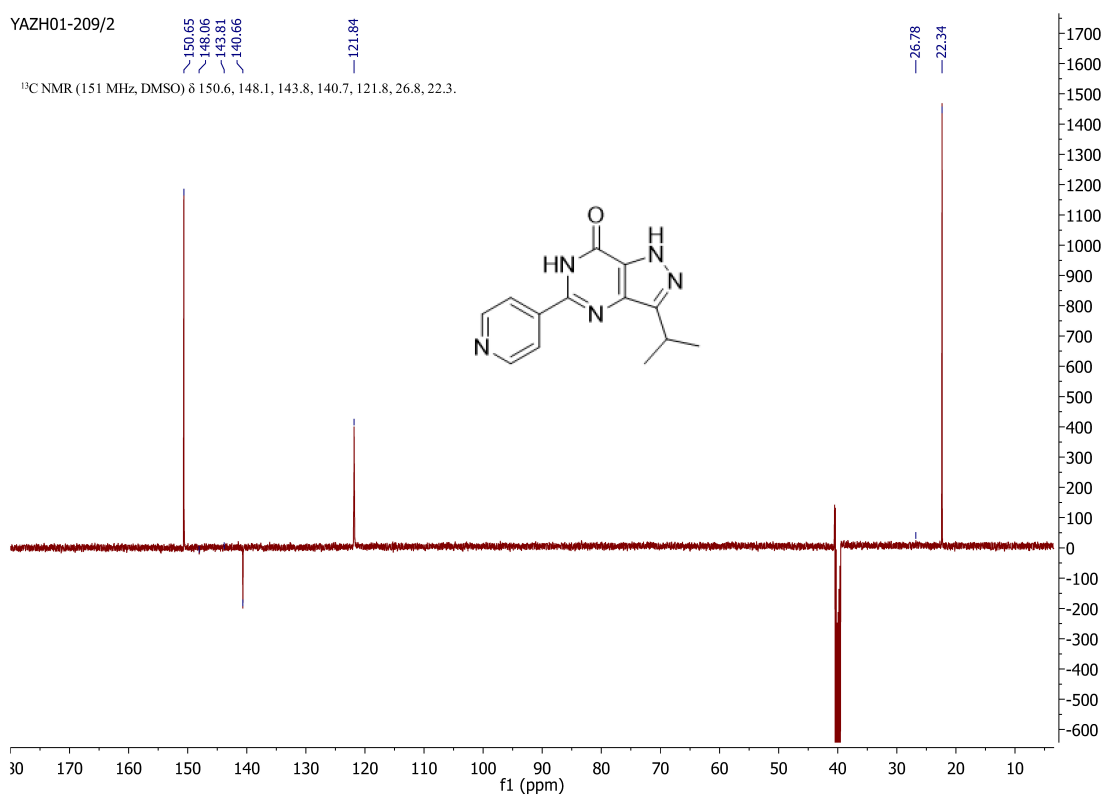

Figure S45. <sup>13</sup>C NMR spectrum of compound **16** (NPD-3488).

Acquired by : Admin  
 Date Acquired : 5/17/2016 12:43:55 PM  
 Sample Name : YAZH-131  
 Sample ID :  
 Tray# : 1  
 Vial# : 20  
 Injection Volume : 1  
 Data File : C:\LabSolutions\Data\2016 - wk20\YAZH-131.lcd  
 Background File : blanco 17052016.lcd  
 Method File : Method SCAN ACID standard.lcm  
 Report Format : DefaultL.CMS.lcr  
 Tuning File : C:\LabSolutions\Tuning\Tuning-ESI-pos-neg01072015a.lct  
 Processed by : Admin  
 Modified Date : 5/17/2016 2:59:15 PM

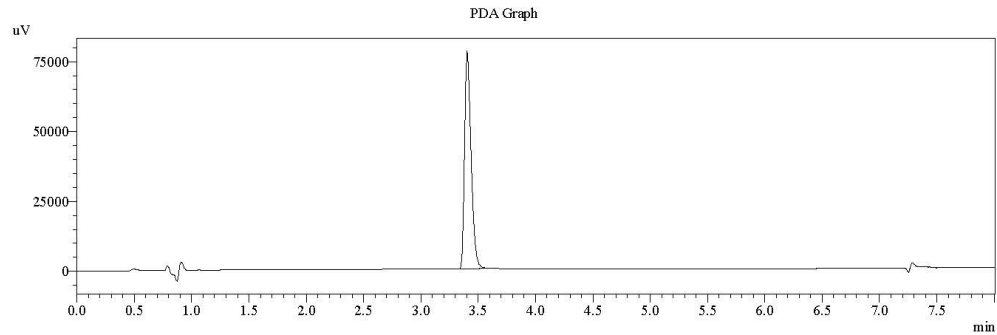

PDA Ch1 254nm 4nm

| Peak# | Name | Ret. Time | Area   | Area%   |
|-------|------|-----------|--------|---------|
| 1     |      | 3.399     | 307369 | 100.000 |

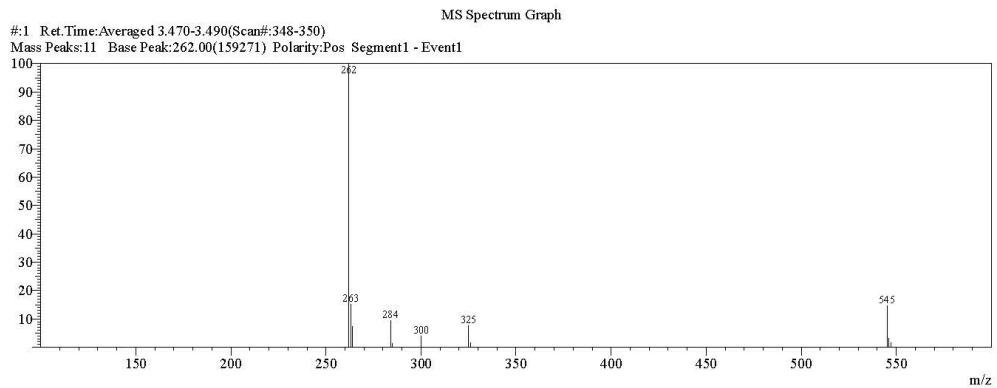

MS Spectrum Table

#1 Ret.Time:  
 BG Mode:Calc 3.370<->3.640(338<->365)

| # | m/z    | Abs.Inten. | Rel.Inten. | Charge | Polarity | Monoisotopic | #  | m/z    | Abs.Inten. | Rel.Inten. | Charge | Polarity | Monoisotopic |
|---|--------|------------|------------|--------|----------|--------------|----|--------|------------|------------|--------|----------|--------------|
| 1 | 262.00 | 159271     | 100.00     |        |          |              | 7  | 325.00 | 12159      | 7.63       |        |          |              |
| 2 | 263.05 | 24117      | 15.14      |        |          |              | 8  | 326.10 | 2444       | 1.53       |        |          |              |
| 3 | 264.00 | 11613      | 7.29       |        |          |              | 9  | 545.05 | 23434      | 14.71      |        |          |              |
| 4 | 283.95 | 15021      | 9.43       |        |          |              | 10 | 546.10 | 5129       | 3.22       |        |          |              |
| 5 | 285.05 | 2316       | 1.45       |        |          |              | 11 | 547.20 | 2335       | 1.47       |        |          |              |
| 6 | 300.05 | 6172       | 3.88       |        |          |              |    |        |            |            |        |          |              |

Figure S46. LCMS spectrum of compound 17 (NPD-2973).

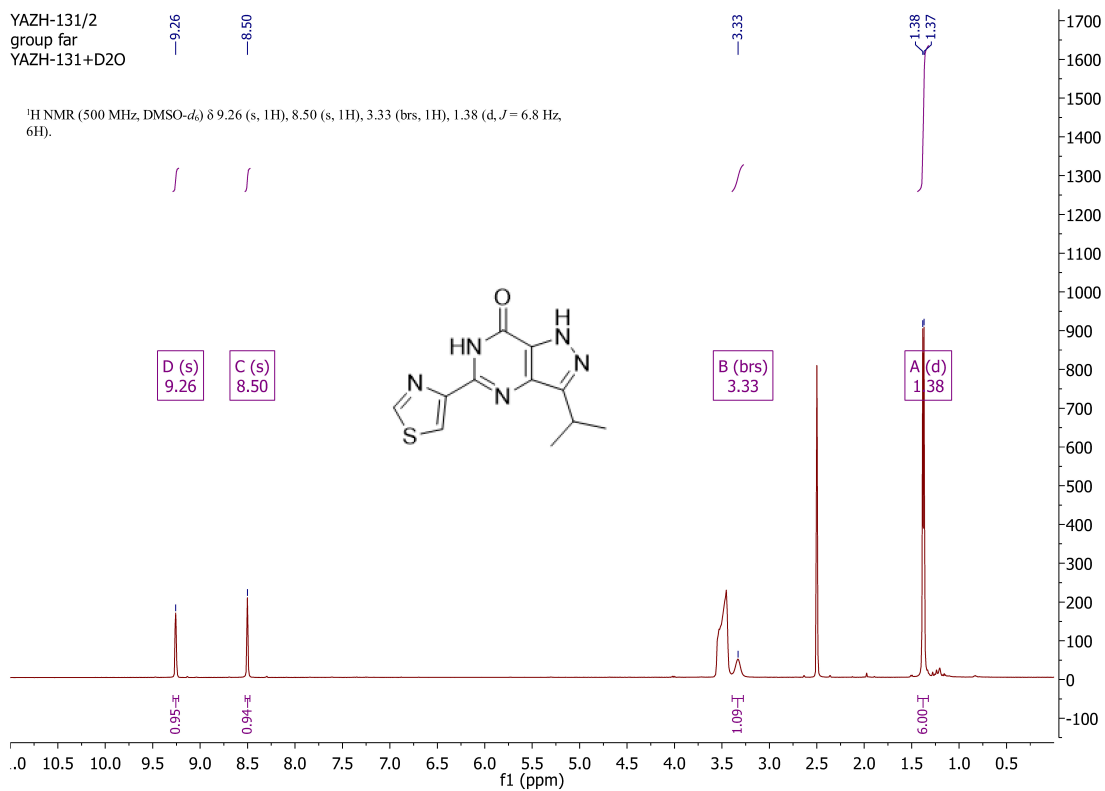

Figure S47. <sup>1</sup>H NMR spectrum of compound **17** (NPD-2973).

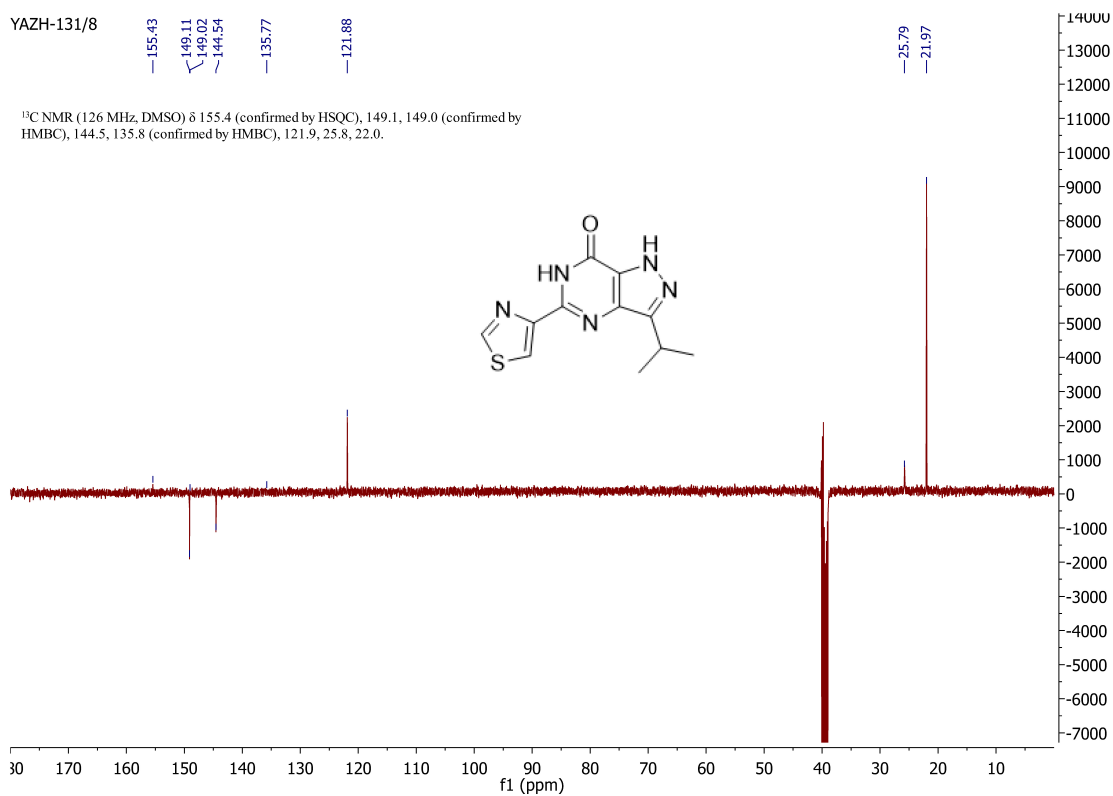

Figure S48. <sup>13</sup>C NMR spectrum of compound **17** (NPD-2973).

Acquired by : Admin  
 Date Acquired : 7/13/2017 1:11:19 PM  
 Sample Name : YAZH01-115  
 Sample ID :  
 Tray# : 1  
 Vial# : 6  
 Injection Volume : 5  
 Data File : C:\LabSolutions\Data\2017\2017-wk28\YAZH01-115.lcd  
 Background File : blanco 13072017.lcd  
 Method File : Method SCAN ACID standard.lcm  
 Report Format : DefaultLCMS1cr  
 Tuning File : C:\LabSolutions\Tuning\Tuning-ESI-pos-neg01072015a1ct  
 Processed by : Admin  
 Modified Date : 7/13/2017 1:56:30 PM

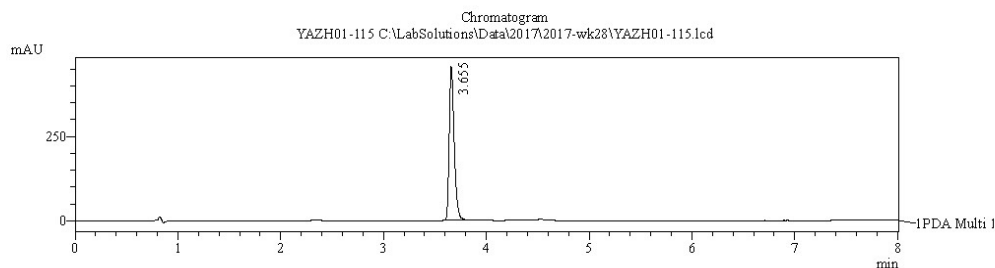

PeakTable

| Peak# | Name | Ret. Time | Area    | Area %  |
|-------|------|-----------|---------|---------|
| 1     |      | 3.655     | 1481181 | 100.000 |

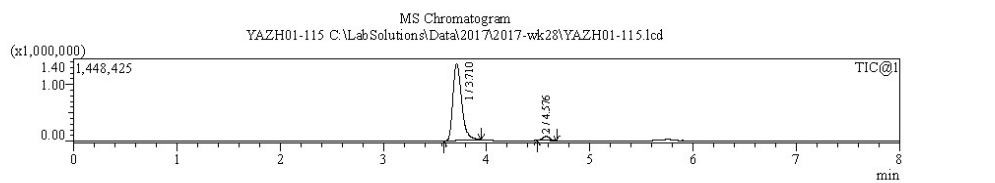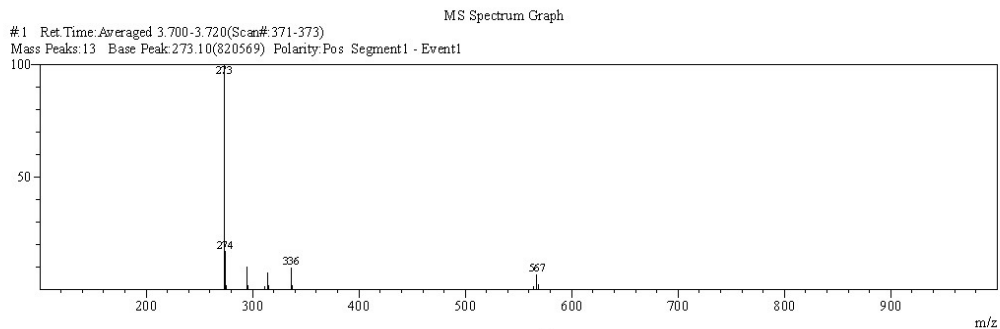

MS Spectrum Table

| #  | m/z    | Abs.Inten. | Rel.Inten. | Charge | Polarity | Monoisotopic |
|----|--------|------------|------------|--------|----------|--------------|
| 1  | 273.10 | 820569     | 100.00     |        |          |              |
| 2  | 274.10 | 140608     | 17.14      |        |          |              |
| 3  | 275.10 | 15194      | 1.85       |        |          |              |
| 4  | 295.05 | 81492      | 9.93       |        |          |              |
| 5  | 296.10 | 13743      | 1.67       |        |          |              |
| 6  | 311.00 | 10039      | 1.22       |        |          |              |
| 7  | 314.10 | 62866      | 7.66       |        |          |              |
| 8  | 315.10 | 13856      | 1.69       |        |          |              |
| 9  | 336.10 | 80666      | 9.83       |        |          |              |
| 10 | 337.10 | 15321      | 1.87       |        |          |              |
| 11 | 564.45 | 11126      | 1.36       |        |          |              |
| 12 | 567.25 | 55571      | 6.77       |        |          |              |
| 13 | 568.30 | 20296      | 2.47       |        |          |              |

Figure S49. LCMS spectrum of compound **18** (NPD-3199).



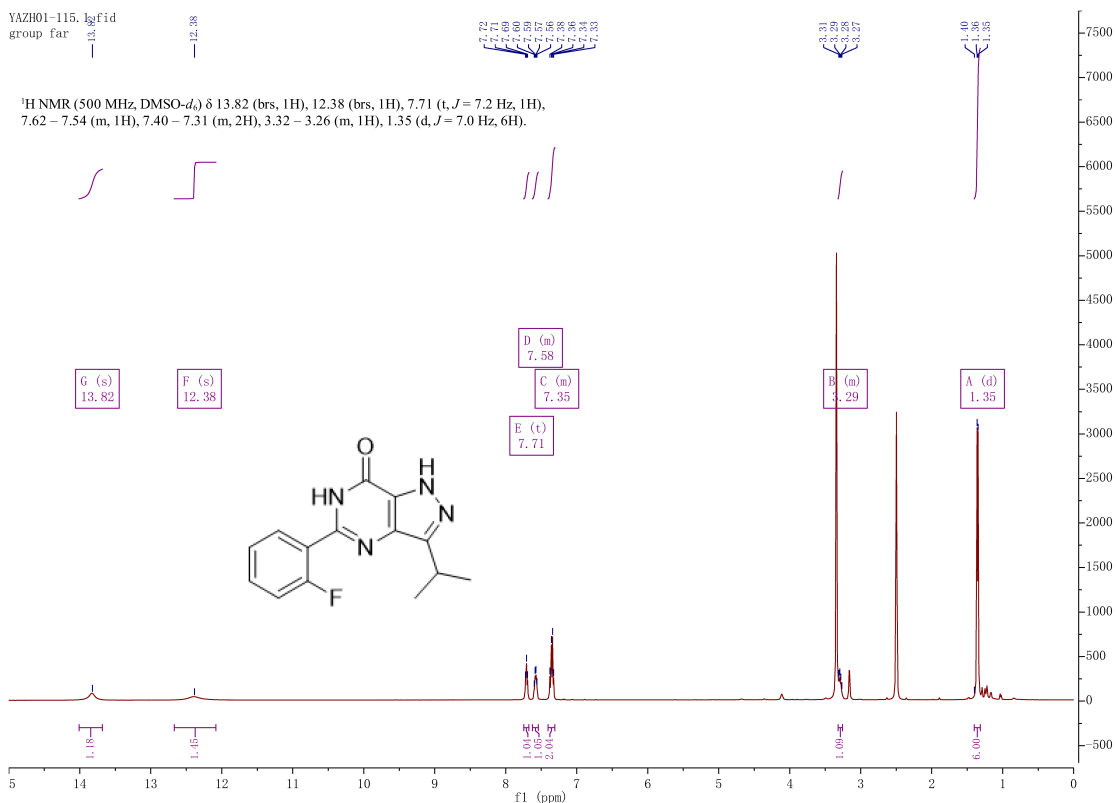

Figure S50. <sup>1</sup>H NMR spectrum of compound **18** (NPD-3199).

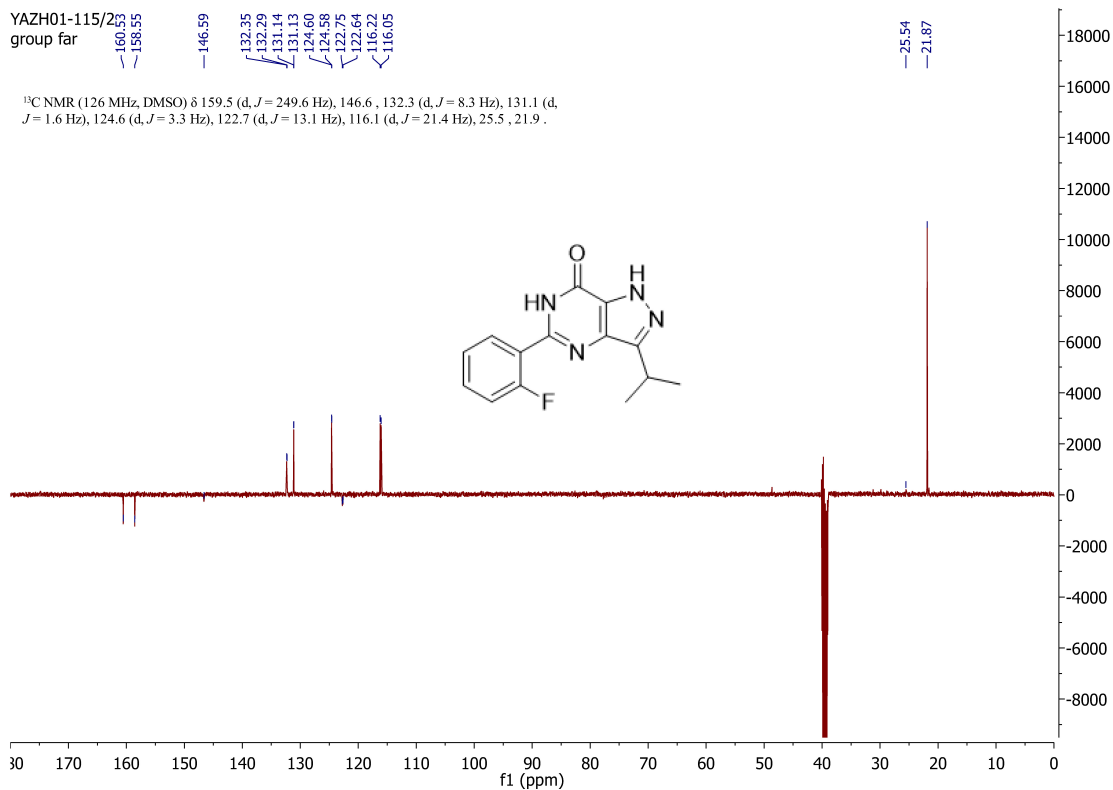

Figure S51. <sup>13</sup>C NMR spectrum of compound **18** (NPD-3199).

Acquired by : Admin  
 Date Acquired : 20/12/2018 3:44:02 PM  
 Sample Name : ODVI-002  
 Sample ID :  
 Tray# : 1  
 Vial# : 8  
 Injection Volume : 5  
 Data File : C:\LabSolutions\Data\2018\2018-wk5\1\ODVI-002.lcd  
 Background File : blanco 20122018.lcd  
 Method File : Method SCAN.ACID.standard.lcm  
 Report Format : DefaultLCMS.lcr  
 Tuning File : C:\LabSolutions\Tuning\Tuning-ESI-pos-neg01072015a.lct  
 Processed by : Admin  
 Modified Date : 20/12/2018 3:52:29 PM

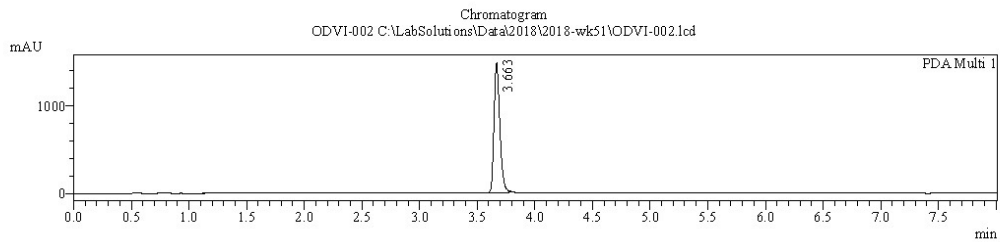

PeakTab1

| Peak# | Name | Ret. Time | Area    | Area %  |
|-------|------|-----------|---------|---------|
| 1     |      | 3.663     | 5181695 | 100.000 |

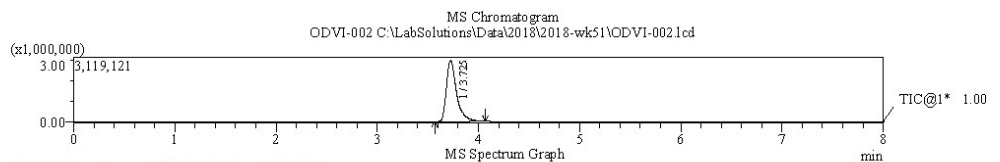

#1 Ret. Time: Averaged 3.720-3.740 (Scan# 373-375)  
 Mass Peaks: 16 Base Peak: 289.05(1524922) Polarity: Pos Segment1 - Event1

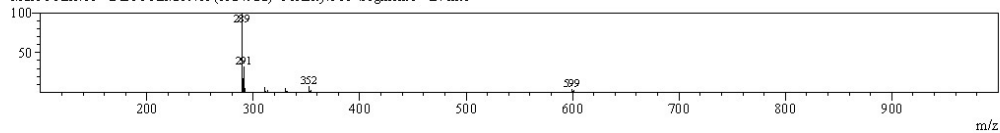

MS Spectrum Table

#1 Ret. Time:  
 BG Mode: Calc 3.570<->4.070(358<->408)

| # | m/z    | Abs.Inten. | Rel.Inten. | Charge | Polarity | Monoisotopic | #  | m/z    | Abs.Inten. | Rel.Inten. | Charge | Polarity | Monoisotopic |
|---|--------|------------|------------|--------|----------|--------------|----|--------|------------|------------|--------|----------|--------------|
| 1 | 289.05 | 1524922    | 100.00     |        |          |              | 9  | 331.05 | 16309      | 1.07       |        |          |              |
| 2 | 290.05 | 260433     | 17.08      |        |          |              | 10 | 332.10 | 25098      | 1.65       |        |          |              |
| 3 | 291.00 | 481508     | 31.58      |        |          |              | 11 | 352.05 | 119175     | 7.82       |        |          |              |
| 4 | 292.00 | 75350      | 4.94       |        |          |              | 12 | 353.05 | 21959      | 1.44       |        |          |              |
| 5 | 311.00 | 90213      | 5.92       |        |          |              | 13 | 354.10 | 42185      | 2.77       |        |          |              |
| 6 | 312.05 | 15563      | 1.02       |        |          |              | 14 | 599.15 | 58059      | 3.81       |        |          |              |
| 7 | 313.05 | 36115      | 2.37       |        |          |              | 15 | 600.15 | 22825      | 1.50       |        |          |              |
| 8 | 330.05 | 75293      | 4.94       |        |          |              | 16 | 601.15 | 46128      | 3.02       |        |          |              |

Figure S52. LCMS spectrum of compound 19 (NPD-3538).

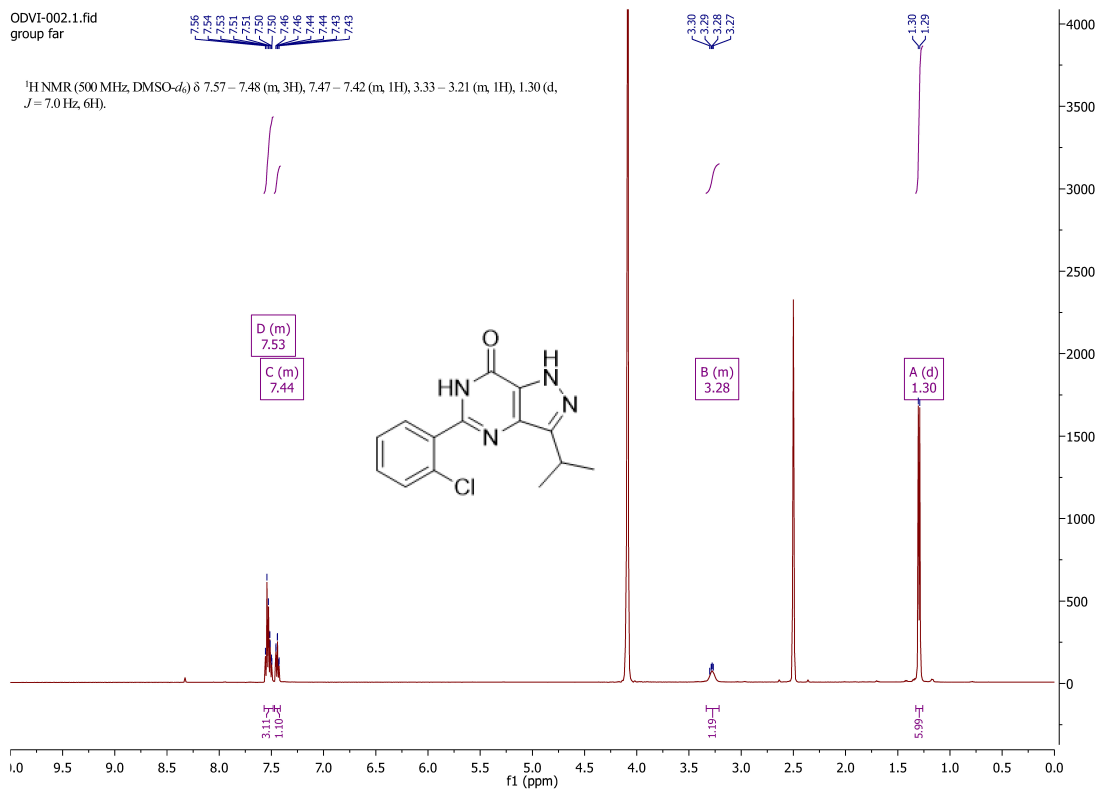

Figure S53. <sup>1</sup>H NMR spectrum of compound **19** (NPD-3538).

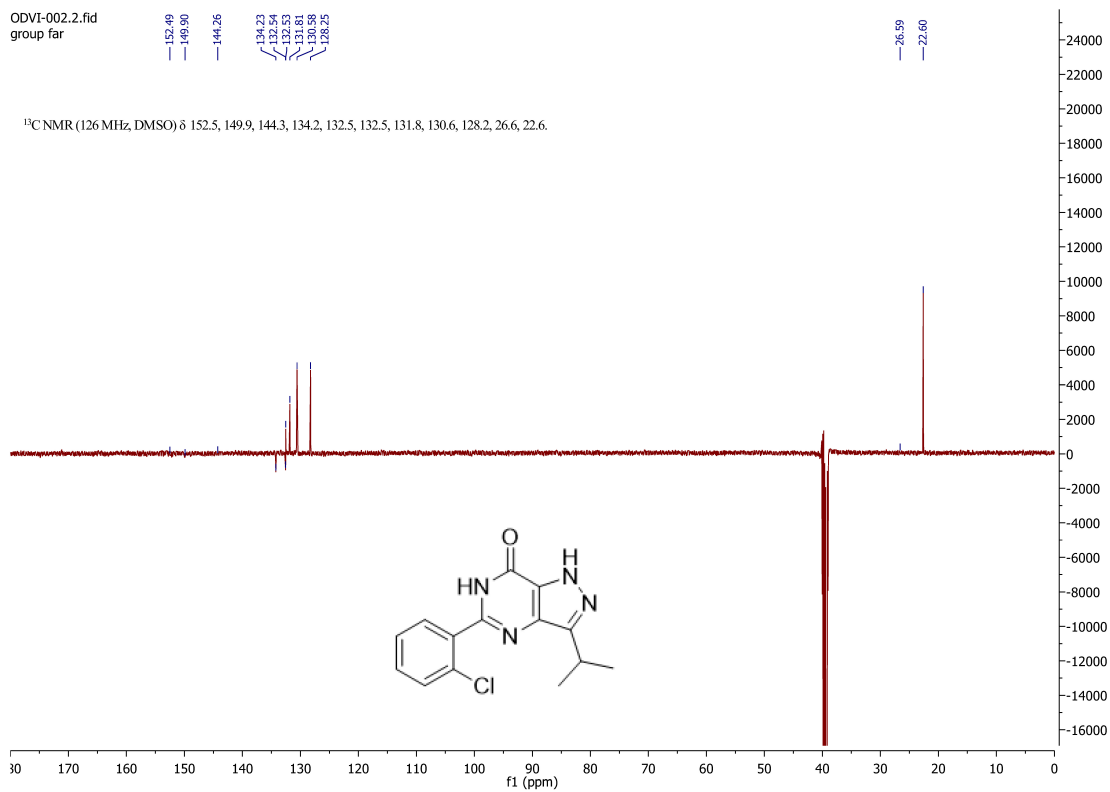

Figure S54. <sup>13</sup>C NMR spectrum of compound **19** (NPD-3538).

Acquired by : Admin  
 Date Acquired : 15/11/2018 9:42:38 AM  
 Sample Name : ODVI01\_037 Pure 15112018  
 Sample ID :  
 Tray# : 1  
 Vial# : 1  
 Injection Volume : 1  
 Data File : C:\LabSolutions\Data\2018\2018-wk46\ODVI01\_037 Pure 15112018.lcd  
 Background File : blanco\_151118.lcd  
 Method File : Method SCAN ACID standard.lcm  
 Report Format : DefaultLCMS.lcr  
 Tuning File : C:\LabSolutions\Tuning\Tuning-ESI-pos-neg01072015a.lct  
 Processed by : Admin  
 Modified Date : 15/11/2018 9:58:15 AM

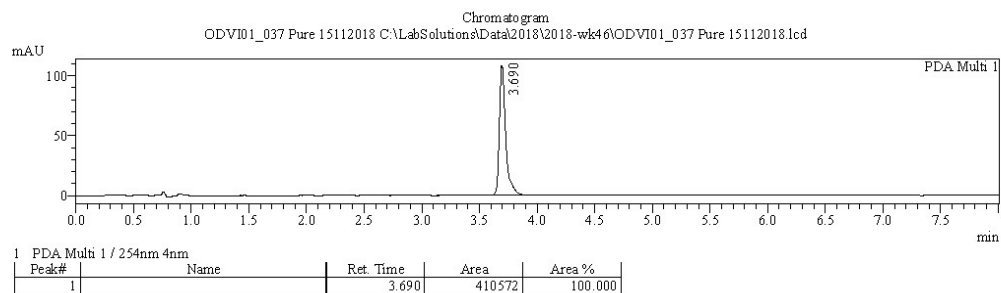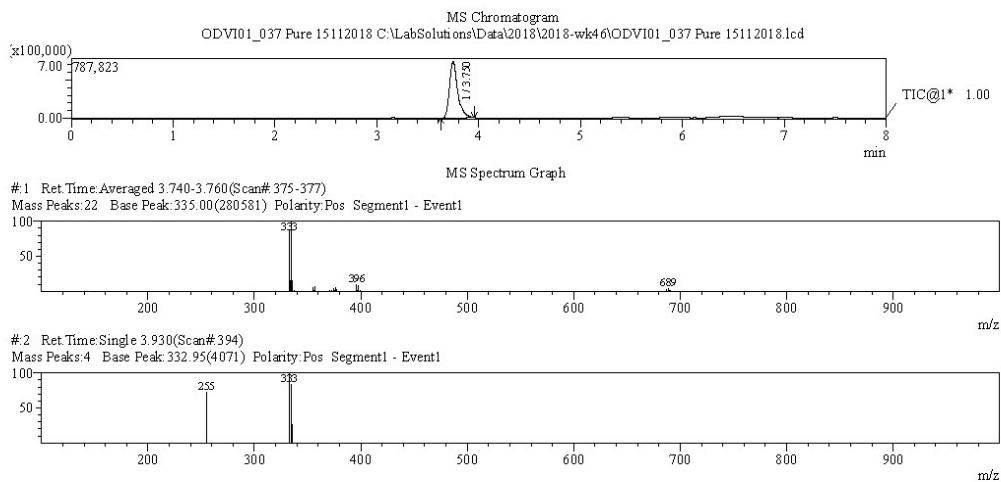

MS Spectrum Table

#1 Ret. Time:  
BG Mode: Calc 3.630 <-> 3.960 (364 <-> 397)  
Mass Peaks: 22 Base Peak: 335.00 (280581) Polarity: Pos Segment1 - Event1

| # | m/z    | Abs.Inten. | Rel.Inten. | Charge | Polanty | Monoisotopic | # | m/z    | Abs.Inten. | Rel.Inten. | Charge | Polanty | Monoisotopic |
|---|--------|------------|------------|--------|---------|--------------|---|--------|------------|------------|--------|---------|--------------|
| 1 | 333.00 | 245343     | 87.44      |        |         |              | 5 | 337.15 | 3821       | 1.36       |        |         |              |
| 2 | 334.00 | 43466      | 15.49      |        |         |              | 6 | 354.95 | 14857      | 5.30       |        |         |              |
| 3 | 335.00 | 280581     | 100.00     |        |         |              | 7 | 356.05 | 5018       | 1.79       |        |         |              |
| 4 | 336.00 | 42171      | 15.03      |        |         |              | 8 | 357.00 | 18710      | 6.67       |        |         |              |

Figure S55. LCMS spectrum of compound **20** (NPD-3539).

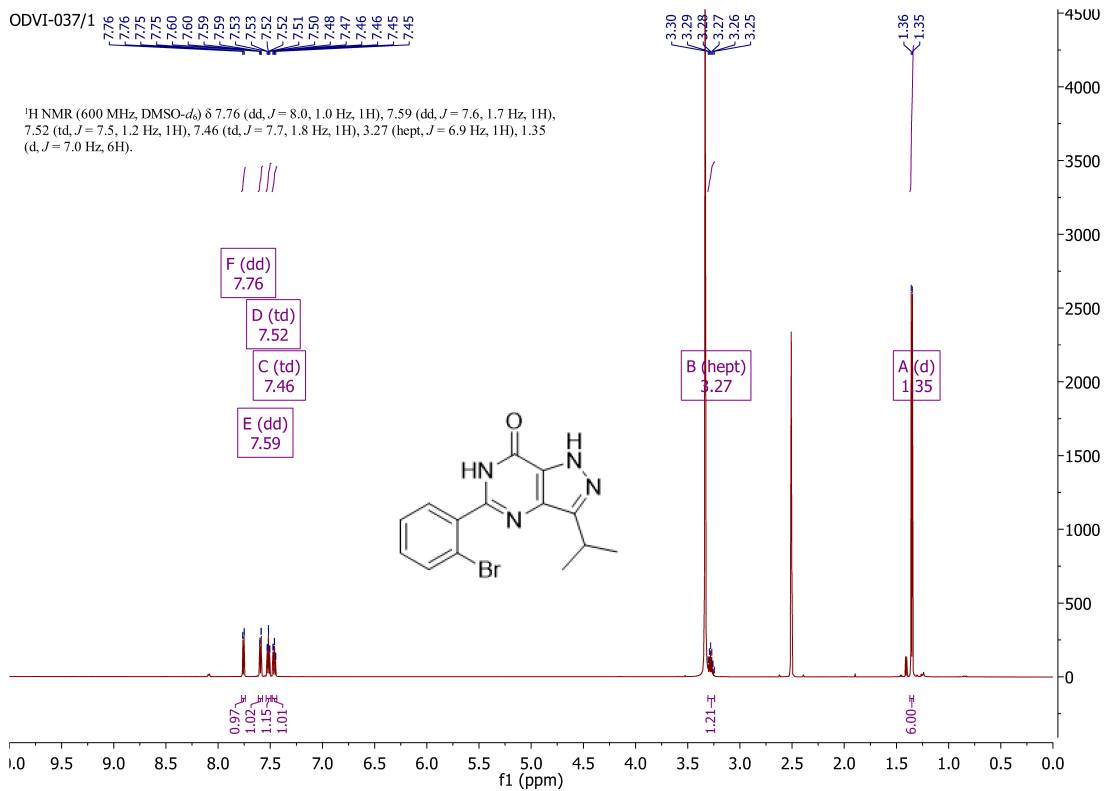

Figure S56. <sup>1</sup>H NMR spectrum of compound **20** (NPD-3539).

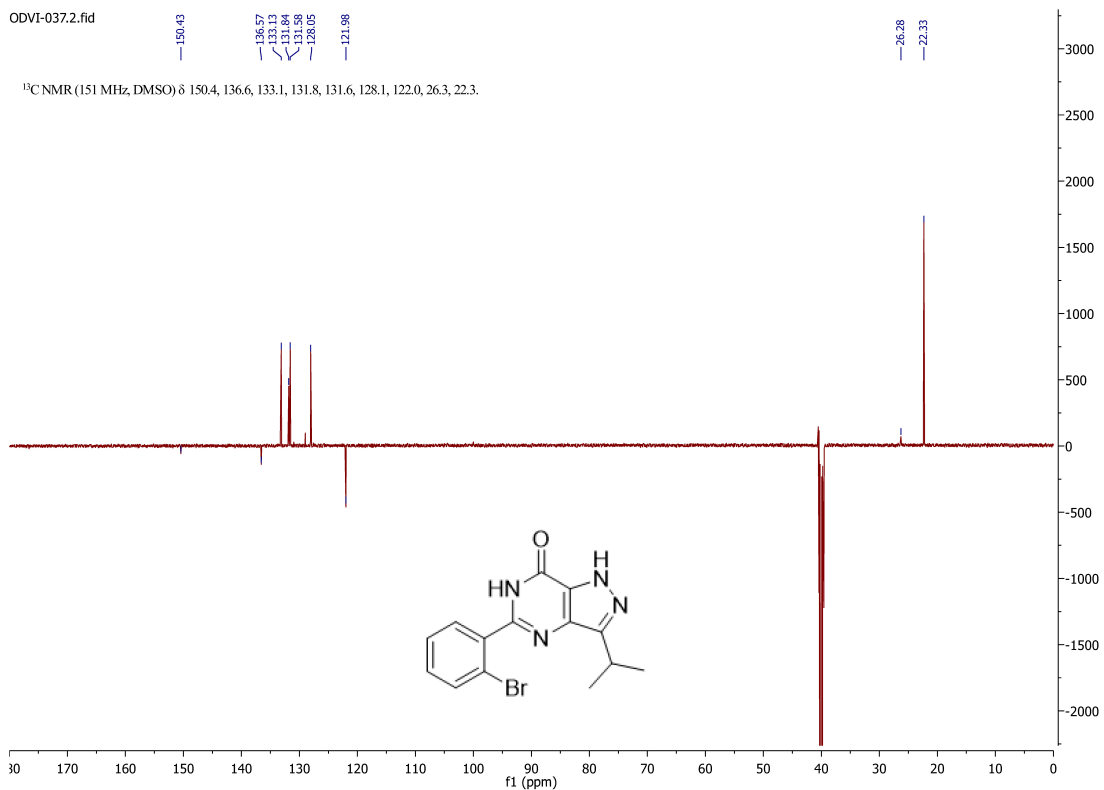

Figure S57. <sup>13</sup>C NMR spectrum of compound **20** (NPD-3539).

Acquired by : Admin  
 Date Acquired : 3/7/2019 12:46:37 PM  
 Sample Name : VUF16899  
 Sample ID :  
 Tray# : 1  
 Vial# : 17  
 Injection Volume : 1  
 Data File : C:\LabSolutions\Data\2019\2019-wk27\VUF16899.lcd  
 Background File : blanco\_03072019.lcd  
 Method File : Method\_SCAN\_ACID\_standard.lcm  
 Report Format : DefaultLCMS.lcr  
 Tuning File : C:\LabSolutions\Tuning\Tuning-ESI-pos-neg01072015a.lct  
 Processed by : Admin  
 Modified Date : 3/7/2019 1:01:11 PM

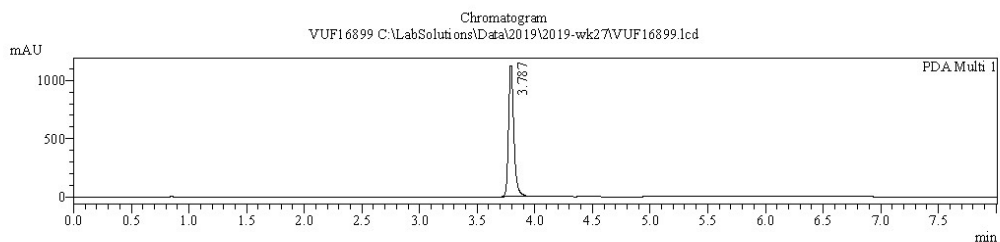

1 PDA Multi 1 / 254nm 4nm

PeakTab1

| Peak# | Name | Ret. Time | Area    | Area %  |
|-------|------|-----------|---------|---------|
| 1     |      | 3.787     | 3569842 | 100.000 |

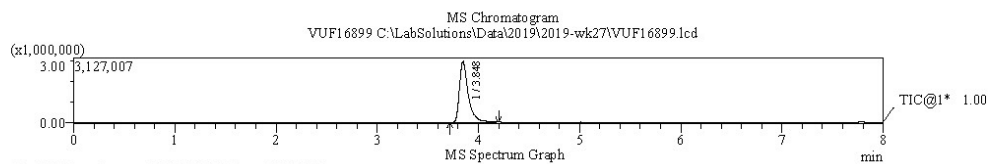

#1 Ret. Time: Averaged 3.840-3.860 (Scan# 385-387)  
 Mass Peaks: 10 Base Peak: 269.05 (2106094) Polarity: Pos Segment1 - Event1

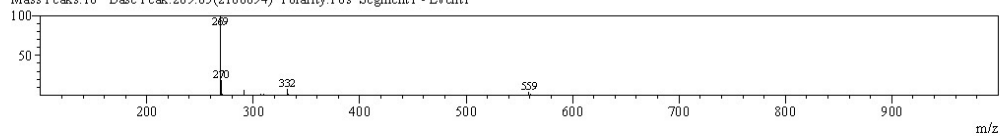

MS Spectrum Table

| # | m/z    | Abs.Inten. | Rel.Inten. | Charge | Polarity | Monoisotopic | #  | m/z    | Abs.Inten. | Rel.Inten. | Charge | Polarity | Monoisotopic |
|---|--------|------------|------------|--------|----------|--------------|----|--------|------------|------------|--------|----------|--------------|
| 1 | 269.05 | 2106094    | 100.00     |        |          |              | 6  | 310.05 | 36373      | 1.73       |        |          |              |
| 2 | 270.05 | 377771     | 17.94      |        |          |              | 7  | 332.10 | 151953     | 7.21       |        |          |              |
| 3 | 271.05 | 35728      | 1.70       |        |          |              | 8  | 333.10 | 30653      | 1.46       |        |          |              |
| 4 | 291.05 | 138338     | 6.57       |        |          |              | 9  | 559.25 | 70066      | 3.33       |        |          |              |
| 5 | 307.05 | 23669      | 1.12       |        |          |              | 10 | 560.20 | 23844      | 1.13       |        |          |              |

Figure. S58 LCMS spectrum of compound **21** (NPD-3589).

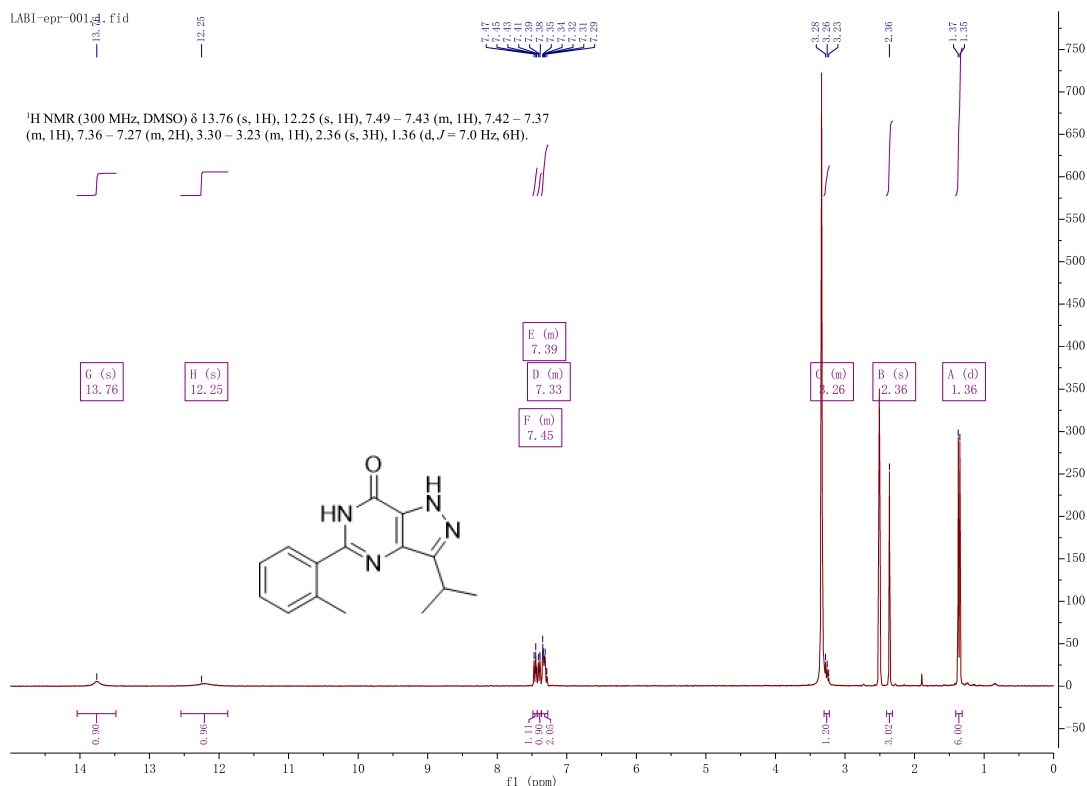

Figure S59. <sup>1</sup>H NMR spectrum of compound **21** (NPD-3589).

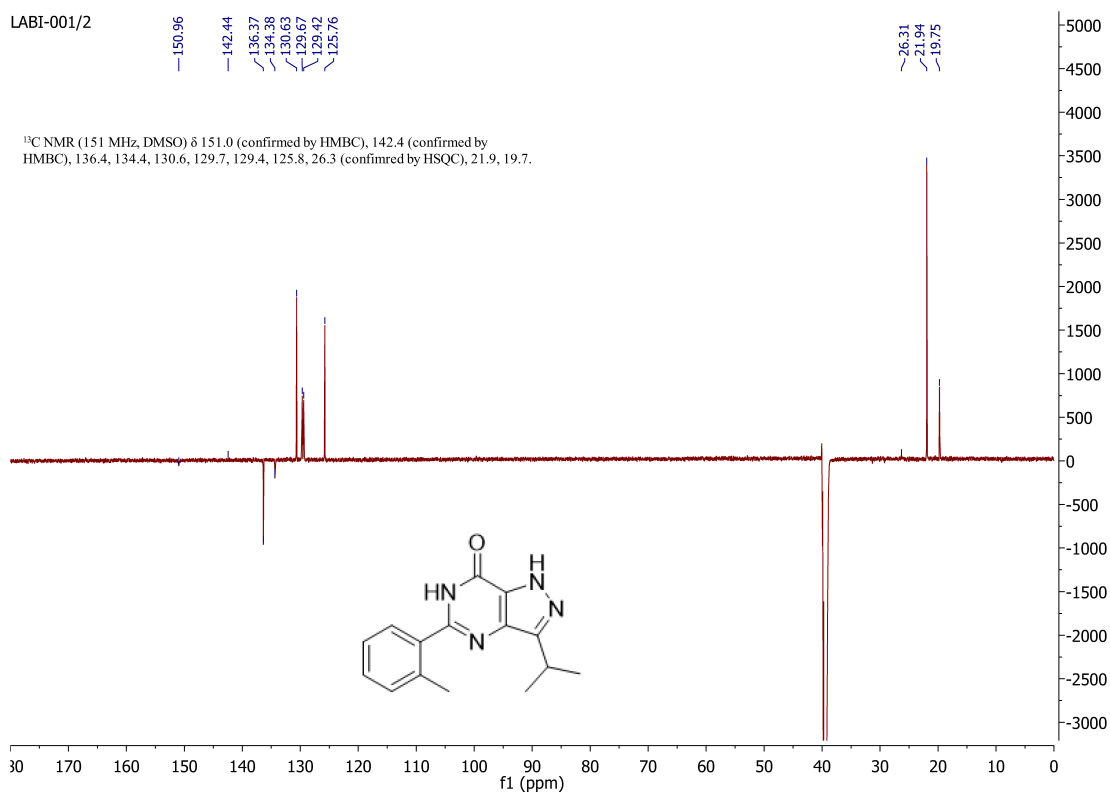

Figure S60. <sup>13</sup>C NMR spectrum of compound **21** (NPD-3589).

Acquired by : Admin  
 Date Acquired : 3/12/2018 3:17:33 PM  
 Sample Name : LABI-FINALPR002  
 Sample ID :  
 Tray# : 1  
 Vial# : 51  
 Injection Volume : 5  
 Data File : C:\LabSolutions\Data\2018\2018-wk49\LABI-FINALPR002.lcd  
 Background File : blanco\_03122018.lcd  
 Method File : Method SCAN.ACID.standard.lcm  
 Report Format : DefaultLCMS.lcr  
 Tuning File : C:\LabSolutions\Tuning\Tuning-ESI-pos-neg01072015a.lct  
 Processed by : Admin  
 Modified Date : 3/12/2018 3:27:49 PM

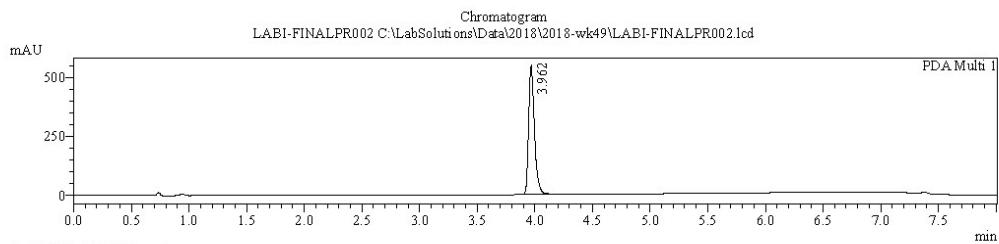

PeakTable

| Peak# | Name | Ret. Time | Area    | Area %  |
|-------|------|-----------|---------|---------|
| 1     |      | 3.962     | 1898026 | 100.000 |

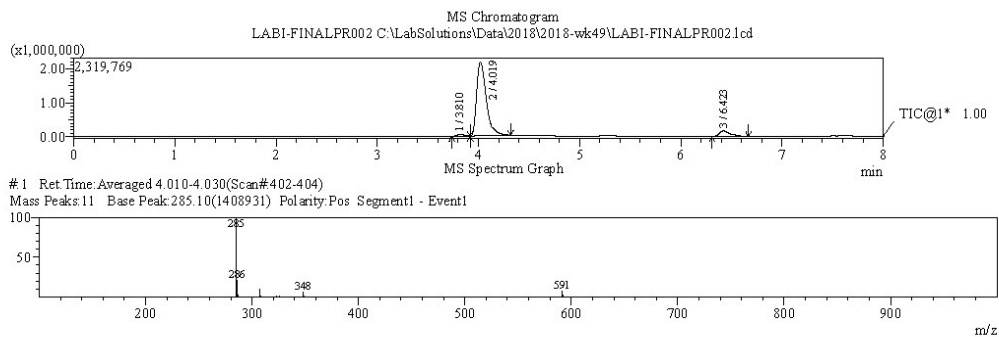

MS Spectrum Table

| # | m/z    | Abs.Inten. | Rel.Inten. | Charge | Polarity | Monoisotopic | #  | m/z    | Abs.Inten. | Rel.Inten. | Charge | Polarity | Monoisotopic |
|---|--------|------------|------------|--------|----------|--------------|----|--------|------------|------------|--------|----------|--------------|
| 1 | 285.10 | 1408931    | 100.00     |        |          |              | 7  | 326.15 | 18220      | 1.29       |        |          |              |
| 2 | 286.10 | 292161     | 20.74      |        |          |              | 8  | 348.05 | 86367      | 6.13       |        |          |              |
| 3 | 287.05 | 27635      | 1.96       |        |          |              | 9  | 349.05 | 17684      | 1.26       |        |          |              |
| 4 | 307.05 | 139653     | 9.91       |        |          |              | 10 | 591.20 | 105593     | 7.49       |        |          |              |
| 5 | 308.10 | 18033      | 1.28       |        |          |              | 11 | 592.20 | 36837      | 2.61       |        |          |              |
| 6 | 323.05 | 14162      | 1.01       |        |          |              |    |        |            |            |        |          |              |

Figure S61. LCMS spectrum of compound 22 (NPD-3590).



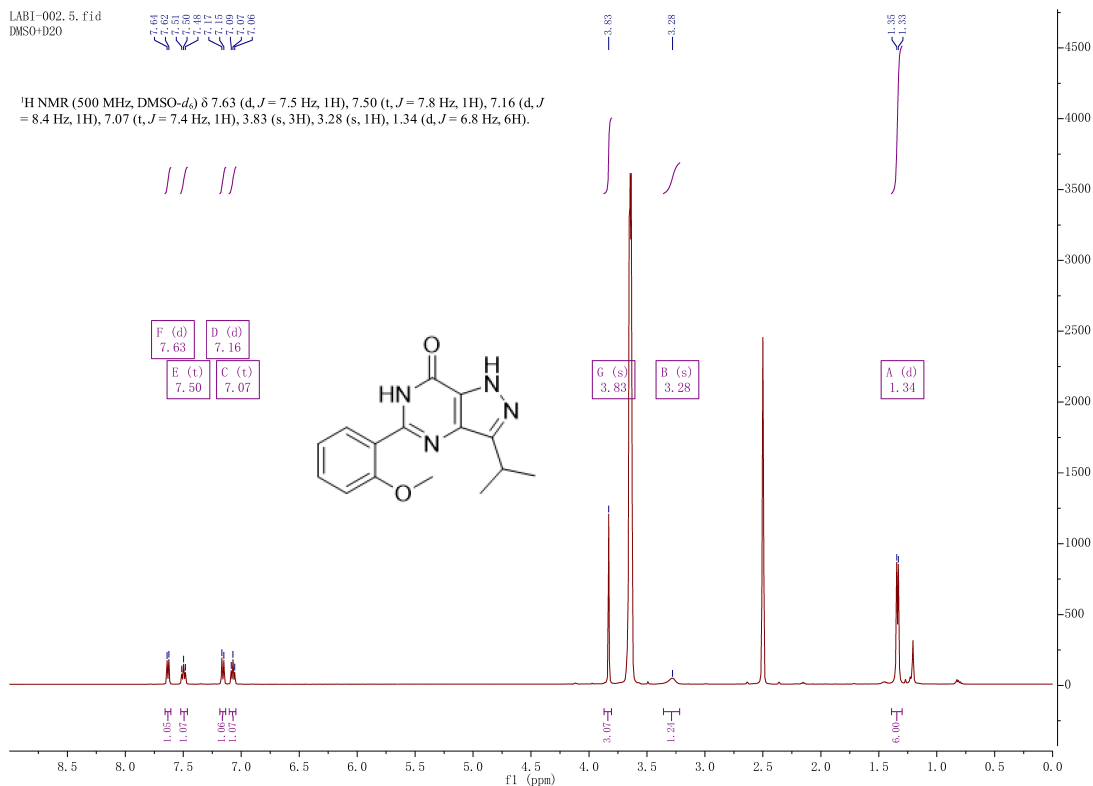

Figure S62. <sup>1</sup>H NMR spectrum of compound 22 (NPD-3590).

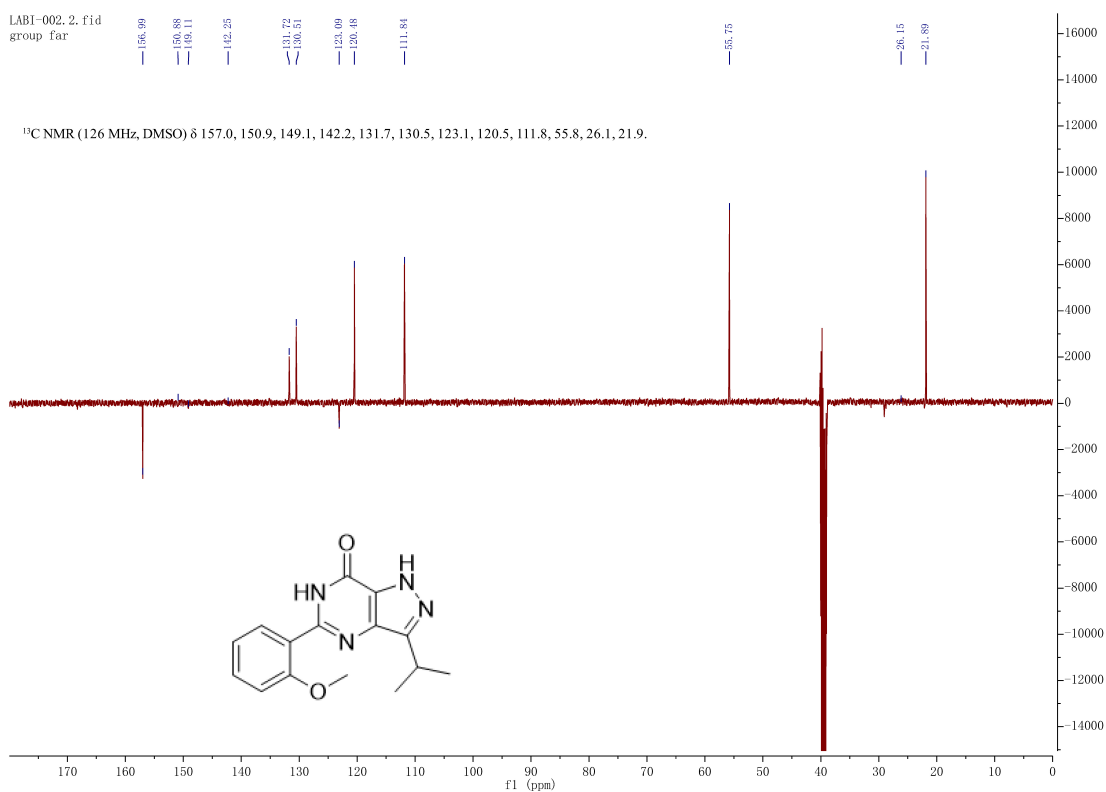

Figure S63. <sup>13</sup>C NMR spectrum of compound 22 (NPD-3590).

Acquired by : Admin  
 Date Acquired : 18/6/2019 3:31:13 PM  
 Sample Name : VUF16256  
 Sample ID :  
 Tray# : 1  
 Vial# : 34  
 Injection Volume : 5  
 Data File : C:\LabSolutions\Data\2019\2019-wk25\VUF16256.lcd  
 Background File : Blanco\_17062019.lcd  
 Method File : Method SCAN ACID standard.lcm  
 Report Format : DefaultLCMS.lcr  
 Tuning File : C:\LabSolutions\Tuning\Tuning-ESI-pos-neg01072015a.lct  
 Processed by : Admin  
 Modified Date : 18/6/2019 3:50:24 PM

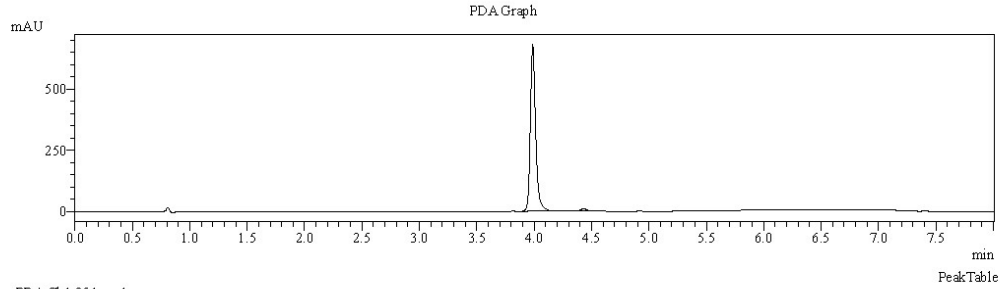

PDA Ch1 254nm 4nm

| Peak# | Name | Ret. Time | Area    | Area%  |
|-------|------|-----------|---------|--------|
| 1     |      | 3.982     | 2151511 | 98.367 |
| 2     |      | 4.424     | 35727   | 1.633  |

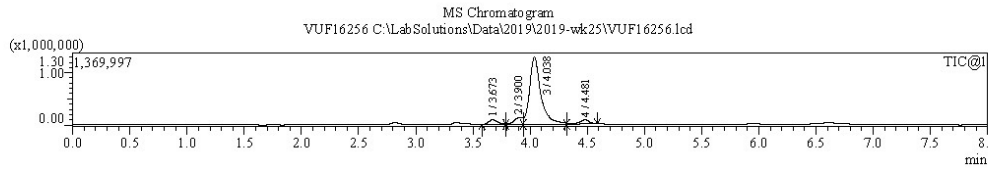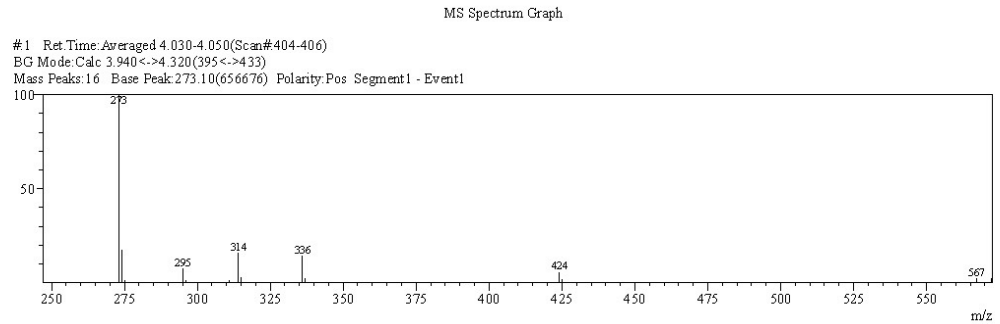

MS Spectrum Table

#1 Ret. Time:  
 BG Mode: Calc 3.940<->4.320(395<->433)  
 Mass Peaks: 16 Base Peak: 273.10(656676) Polarity: Pos Segment1 - Event1

| # | m/z    | Abs.Inten. | Rel.Inten. | Charge | Polarity | Monoisotopic | #  | m/z    | Abs.Inten. | Rel.Inten. | Charge | Polarity | Monoisotopic |
|---|--------|------------|------------|--------|----------|--------------|----|--------|------------|------------|--------|----------|--------------|
| 1 | 247.05 | 36967      | 5.63       |        |          |              | 9  | 315.05 | 19551      | 2.98       |        |          |              |
| 2 | 273.10 | 656676     | 100.00     |        |          |              | 10 | 336.05 | 91548      | 13.94      |        |          |              |
| 3 | 274.10 | 112147     | 17.08      |        |          |              | 11 | 337.05 | 15753      | 2.40       |        |          |              |
| 4 | 275.05 | 8639       | 1.32       |        |          |              | 12 | 424.15 | 36360      | 5.54       |        |          |              |
| 5 | 295.05 | 49024      | 7.47       |        |          |              | 13 | 425.15 | 9337       | 1.42       |        |          |              |
| 6 | 296.05 | 7690       | 1.17       |        |          |              | 14 | 567.20 | 15113      | 2.30       |        |          |              |
| 7 | 311.05 | 7815       | 1.19       |        |          |              | 15 | 572.20 | 15073      | 2.30       |        |          |              |
| 8 | 314.10 | 102327     | 15.58      |        |          |              | 16 | 572.65 | 22697      | 3.46       |        |          |              |

Figure S64. LCMS spectrum of compound 23 (NPD-3202).

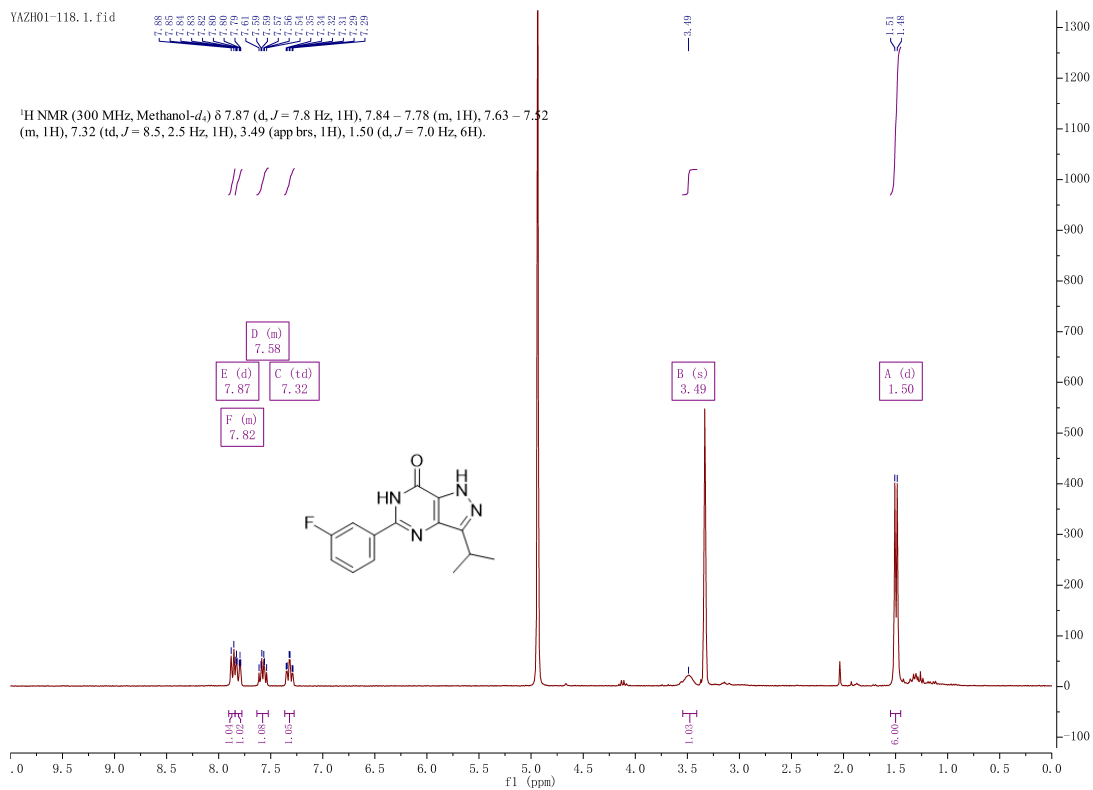

Figure S65. <sup>1</sup>H NMR spectrum of compound **23** (NPD-3202).

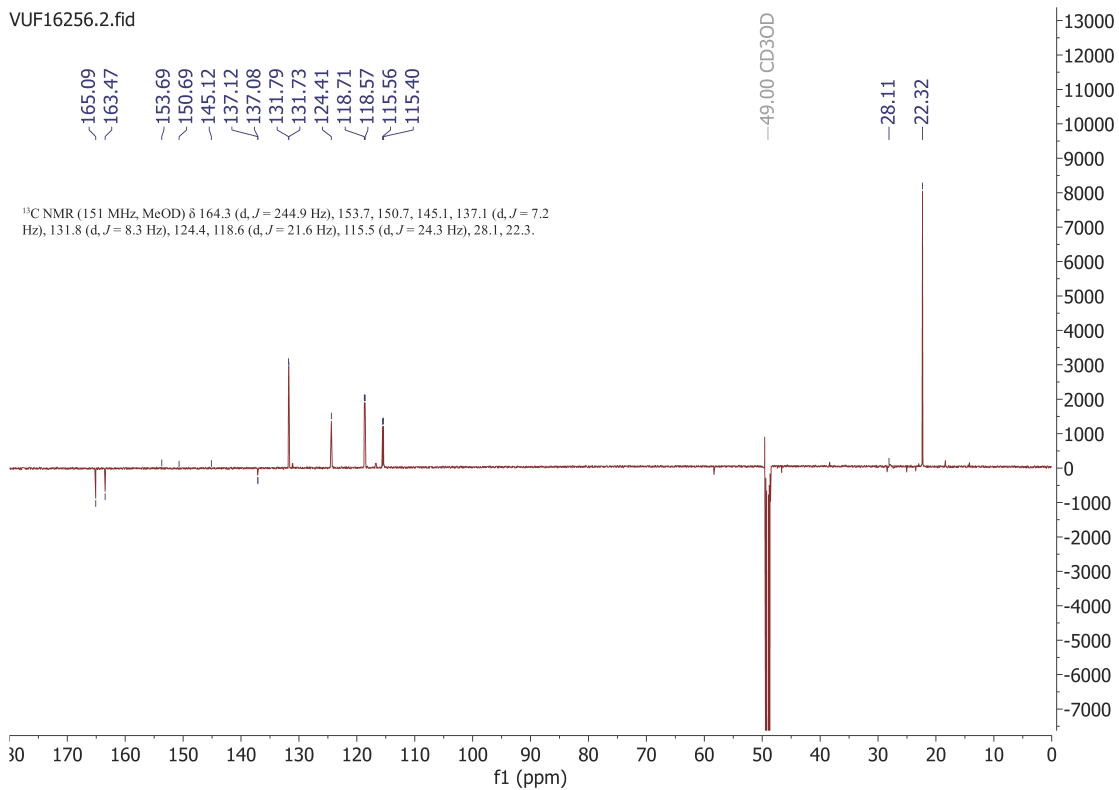

Figure S66. <sup>13</sup>C NMR spectrum of compound **23** (NPD-3202).

Acquired by : Admin  
 Date Acquired : 2/11/2018 9:39:12 AM  
 Sample Name : LABI-EPR-003  
 Sample ID :  
 Tray# : 1  
 Vial# : 3  
 Injection Volume : 1  
 Data File : C:\LabSolutions\Data\2018\2018-wk47\LABI-EPR-003.lcd  
 Background File : Blanco 21112018.lcd  
 Method File : Method SCAN ACID standard.lcm  
 Report Format : DefaultLCMS1.r  
 Tuning File : C:\LabSolutions\Tuning\Tuning-ESI-pos-neg01072015a.lct  
 Processed by : Admin  
 Modified Date : 2/12/2020 3:21:13 PM

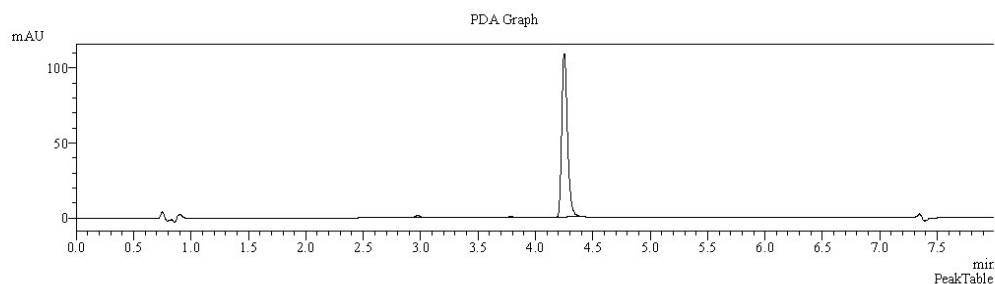

PDA Ch1 254nm 4nm

| Peak# | Name | Ret. Time | Area   | Area % |
|-------|------|-----------|--------|--------|
| 1     |      | 2.966     | 3475   | 0.901  |
| 2     |      | 3.783     | 713    | 0.185  |
| 3     |      | 4.245     | 381408 | 98.914 |

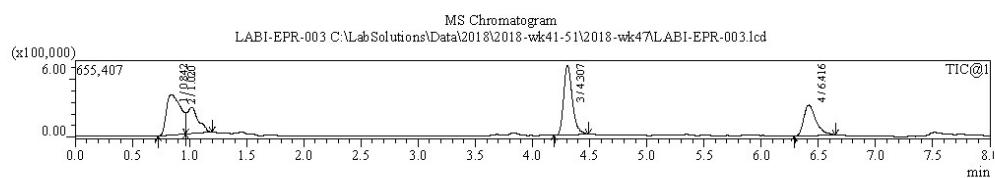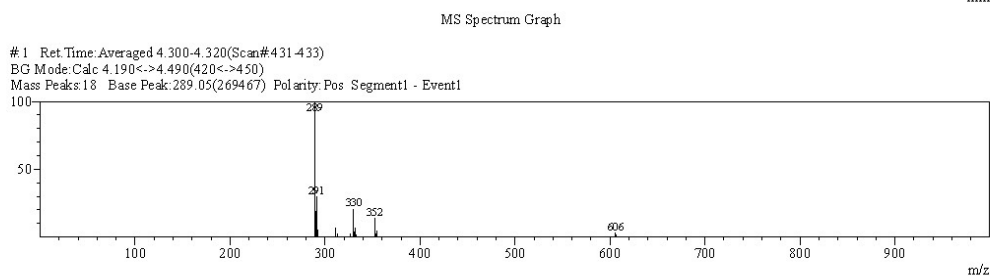

MS Spectrum Table

#1 Ret. Time:  
 BG Mode: Calc 4.190<->4.490(420<->450)  
 Mass Peaks: 18 Base Peak: 289.05(269467) Polarity: Pos Segment1 - Event1

| # | m/z    | Abs.Inten. | Rel.Inten. | Charge | Polarity | Monoisotopic | #  | m/z    | Abs.Inten. | Rel.Inten. | Charge | Polarity | Monoisotopic |
|---|--------|------------|------------|--------|----------|--------------|----|--------|------------|------------|--------|----------|--------------|
| 1 | 289.05 | 269467     | 100.00     |        |          |              | 10 | 331.10 | 10065      | 3.74       |        |          |              |
| 2 | 290.00 | 49867      | 18.51      |        |          |              | 11 | 332.10 | 18171      | 6.74       |        |          |              |
| 3 | 291.10 | 79625      | 29.62      |        |          |              | 12 | 333.10 | 4125       | 1.53       |        |          |              |
| 4 | 292.10 | 14178      | 5.26       |        |          |              | 13 | 352.10 | 37789      | 14.02      |        |          |              |
| 5 | 311.05 | 17517      | 6.50       |        |          |              | 14 | 353.25 | 5742       | 2.13       |        |          |              |
| 6 | 313.05 | 5487       | 2.04       |        |          |              | 15 | 354.05 | 12482      | 4.63       |        |          |              |
| 7 | 327.10 | 5969       | 2.22       |        |          |              | 16 | 605.15 | 5778       | 2.14       |        |          |              |
| 8 | 329.25 | 2972       | 1.10       |        |          |              | 17 | 606.00 | 7511       | 2.79       |        |          |              |
| 9 | 330.10 | 55307      | 20.52      |        |          |              | 18 | 606.95 | 3608       | 1.34       |        |          |              |

Figure S67. LCMS spectrum of compound **24** (NPD-3591).

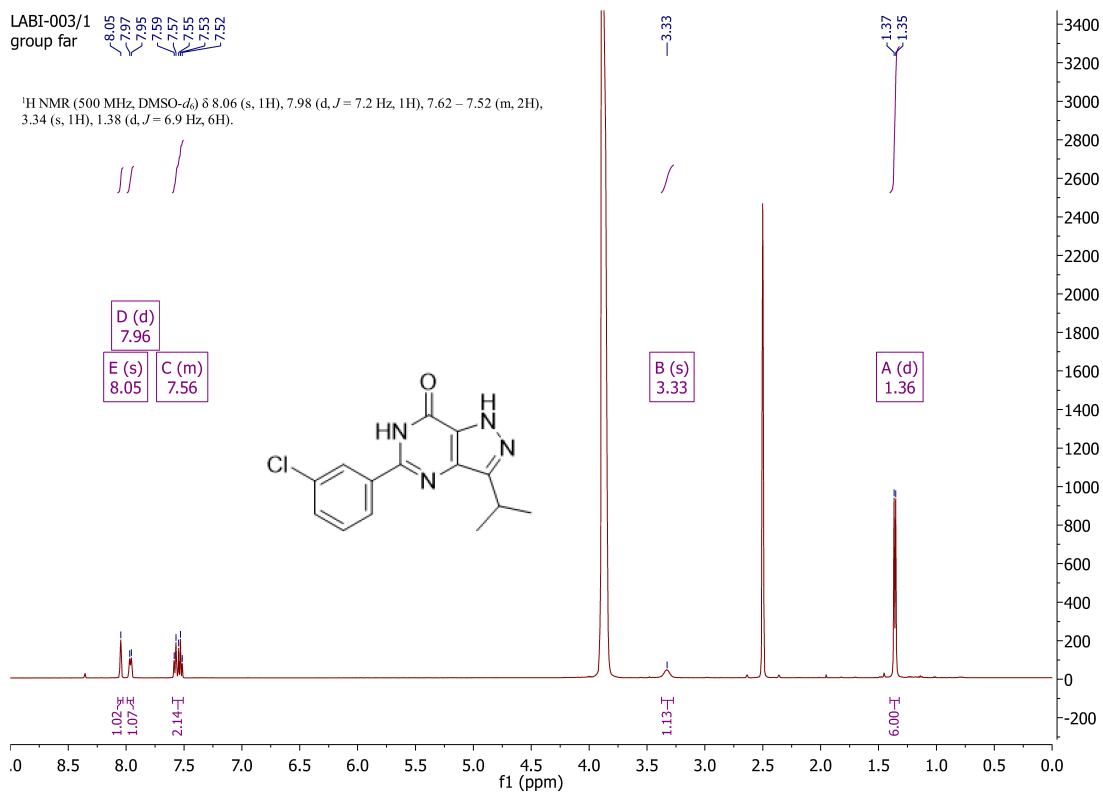

Figure S68.  $^1\text{H NMR}$  spectrum of compound **24** (NPD-3591).

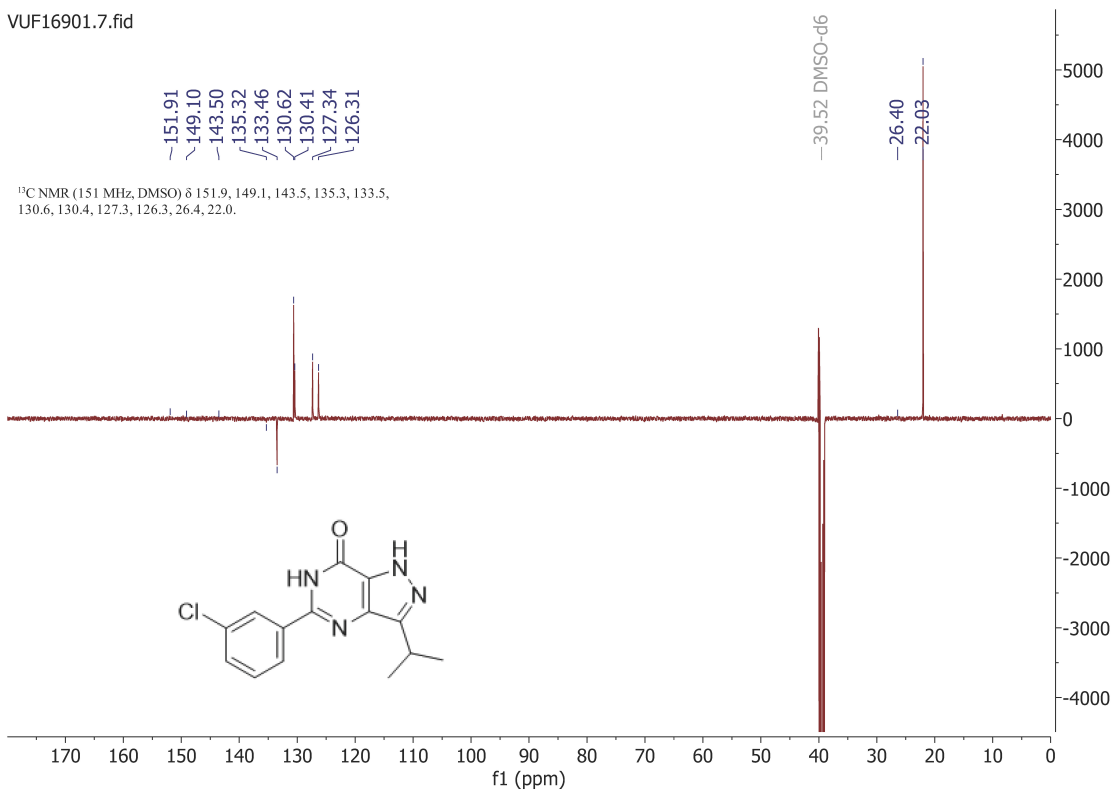

Figure S69.  $^{13}\text{C NMR}$  spectrum of compound **24** (NPD-3591).

Acquired by : Admin  
 Date Acquired : 25/4/2018 2:06:52 PM  
 Sample Name : YAZH01-206  
 Sample ID :  
 Tray# : 1  
 Vial# : 22  
 Injection Volume : 3  
 Data File : C:\LabSolutions\Data\2018\2018-wk17\YAZH01-206.lcd  
 Background File : blanco 25042018.lcd  
 Method File : Method SCAN ACID standard.lcm  
 Report Format : DefaultL.CMS.lcr  
 Tuning File : C:\LabSolutions\Tuning\Tuning-ESI-pos-neg01072015a.lct  
 Processed by : Admin  
 Modified Date : 25/4/2018 3:20:15 PM

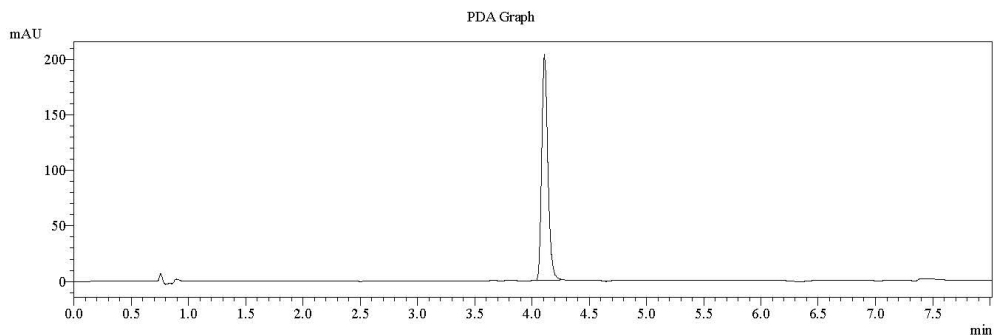

PDA Ch1 254nm 4nm

| Peak# | Name | Ret. Time | Area   | Area %  |
|-------|------|-----------|--------|---------|
| 1     |      | 4.104     | 758929 | 100.000 |

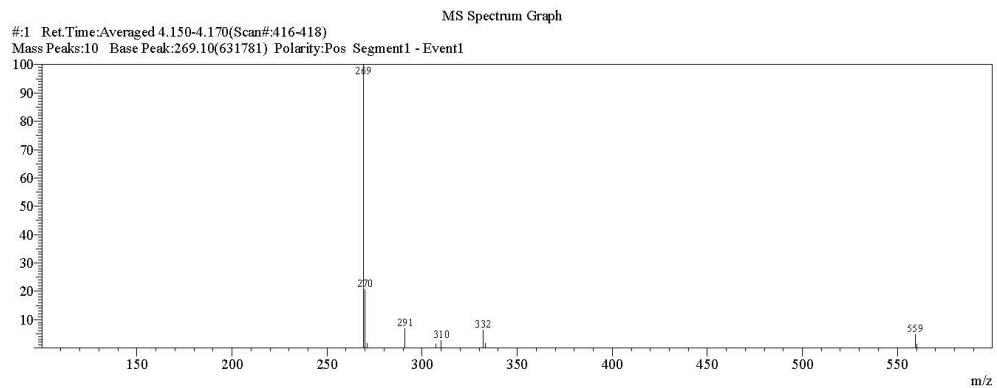

MS Spectrum Table

#1 Ret.Time:  
 BG Mode:Calc 4.040<->4.370(405<->438)

| # | m/z    | Abs.Inten. | Rel.Inten. | Charge | Polarity | Monoisotopic | #  | m/z    | Abs.Inten. | Rel.Inten. | Charge | Polarity | Monoisotopic |
|---|--------|------------|------------|--------|----------|--------------|----|--------|------------|------------|--------|----------|--------------|
| 1 | 269.10 | 631781     | 100.00     |        |          |              | 6  | 310.10 | 16452      | 2.60       |        |          |              |
| 2 | 270.00 | 129930     | 20.57      |        |          |              | 7  | 332.10 | 39970      | 6.33       |        |          |              |
| 3 | 271.10 | 9945       | 1.57       |        |          |              | 8  | 333.10 | 9372       | 1.48       |        |          |              |
| 4 | 291.05 | 43754      | 6.93       |        |          |              | 9  | 559.25 | 29401      | 4.65       |        |          |              |
| 5 | 307.05 | 8423       | 1.33       |        |          |              | 10 | 560.20 | 8558       | 1.35       |        |          |              |

Figure S70. LCMS spectrum of compound **25** (NPD-3382).

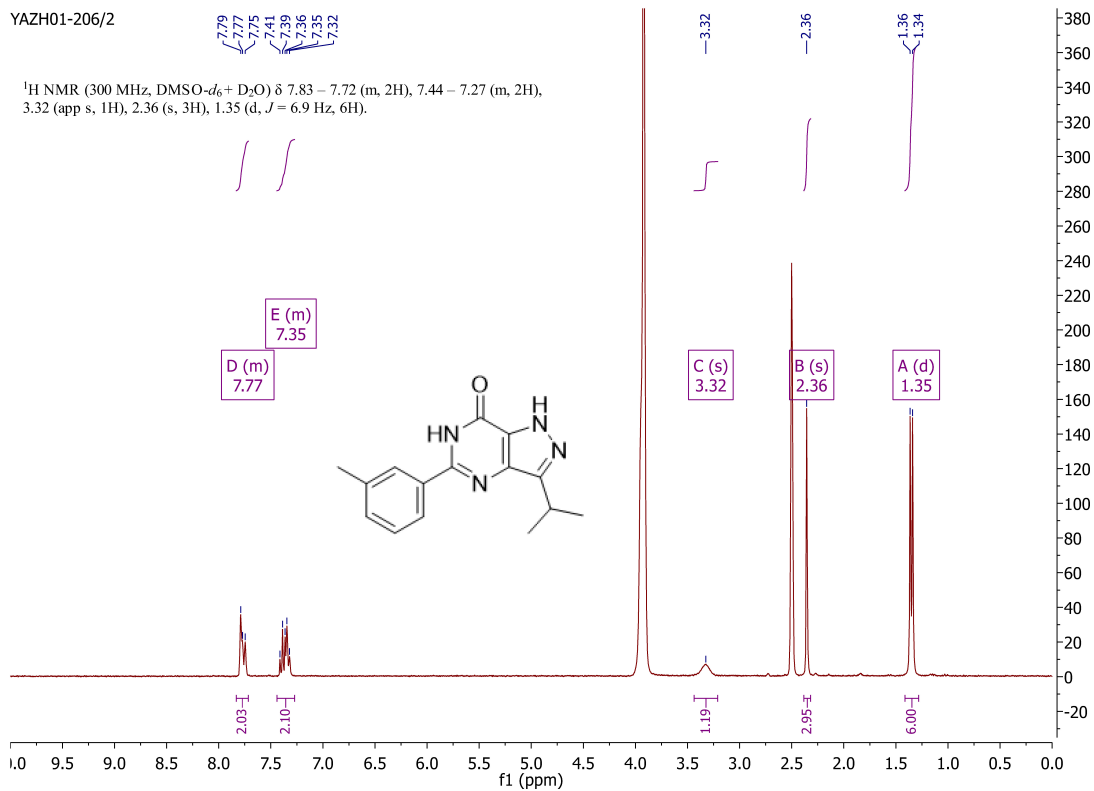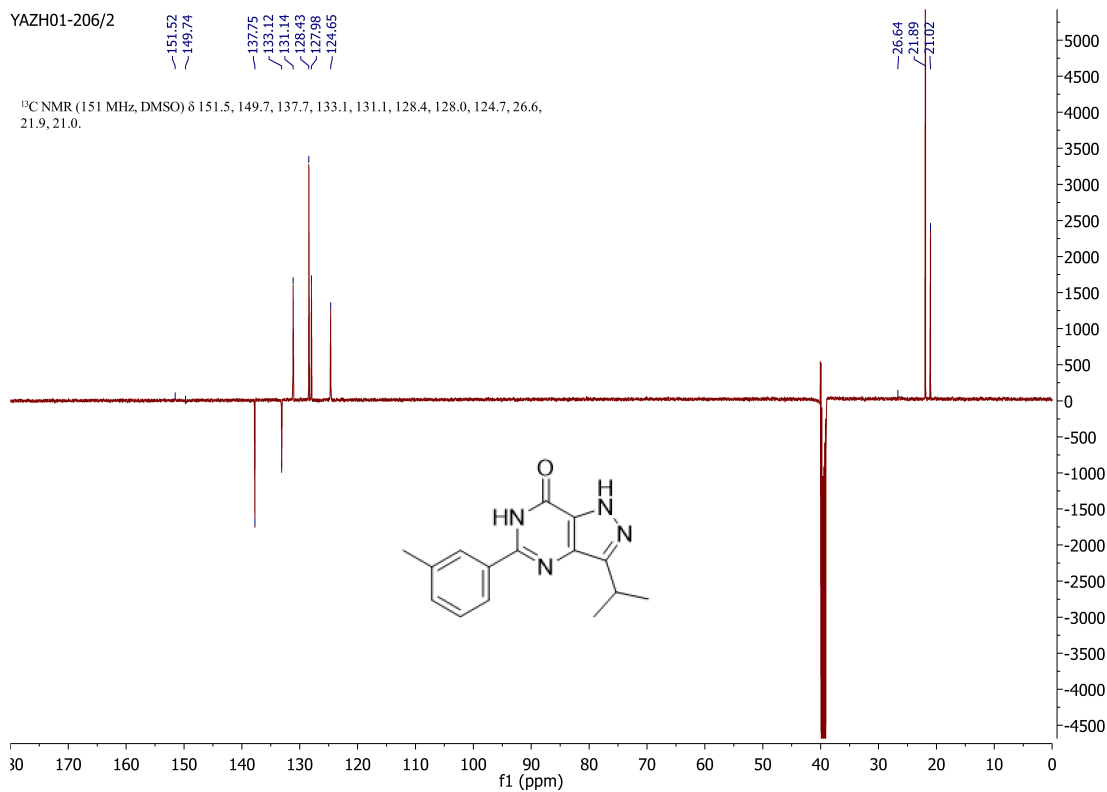

Acquired by : Admin  
 Date Acquired : 6/4/2018 11:20:23 AM  
 Sample Name : YAZH01-197  
 Sample ID :  
 Tray# : 1  
 Vial# : 4  
 Injection Volume : 3  
 Data File : C:\LabSolutions\Data\2018\2018-wk14\YAZH01-197.lcd  
 Background File : blanco 06042018.lcd  
 Method File : Method SCAN ACID standard.lcm  
 Report Format : DefaultL.CMS.lcr  
 Tuning File : C:\LabSolutions\Tuning\Tuning-ESI-pos-neg01072015a.lct  
 Processed by : Admin  
 Modified Date : 6/4/2018 1:42:05 PM

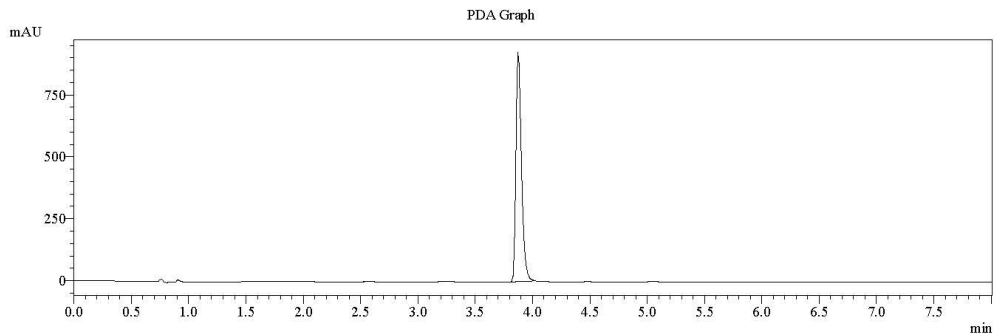

PDA Ch1 254nm 4mm

| Peak# | Name | Ret. Time | Area    | Area%   |
|-------|------|-----------|---------|---------|
| 1     |      | 3.870     | 3116510 | 100.000 |

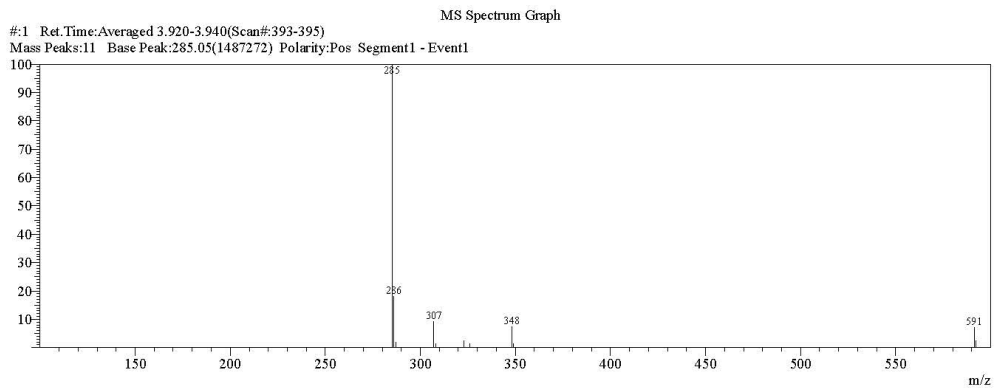

MS Spectrum Table

#1 Ret.Time:  
 BG Mode:Calc 3.800<->4.210(381<->422)  
 Mass Peaks:11 Base Peak:285.05(1487272) Polarity:Pos Segment1 - Event1

| # | m/z    | Abs.Inten. | Rel.Inten. | Charge | Polarity | Monoisotopic | #  | m/z    | Abs.Inten. | Rel.Inten. | Charge | Polarity | Monoisotopic |
|---|--------|------------|------------|--------|----------|--------------|----|--------|------------|------------|--------|----------|--------------|
| 1 | 285.05 | 1487272    | 100.00     |        |          |              | 7  | 326.10 | 21194      | 1.43       |        |          |              |
| 2 | 286.10 | 270037     | 18.16      |        |          |              | 8  | 348.10 | 108135     | 7.27       |        |          |              |
| 3 | 287.10 | 27058      | 1.82       |        |          |              | 9  | 349.10 | 20152      | 1.35       |        |          |              |
| 4 | 307.10 | 136434     | 9.17       |        |          |              | 10 | 591.25 | 106501     | 7.16       |        |          |              |
| 5 | 308.05 | 21442      | 1.44       |        |          |              | 11 | 592.30 | 36512      | 2.45       |        |          |              |
| 6 | 323.00 | 35404      | 2.38       |        |          |              |    |        |            |            |        |          |              |

Figure S73. LCMS spectrum of compound **26** (NPD-3375).



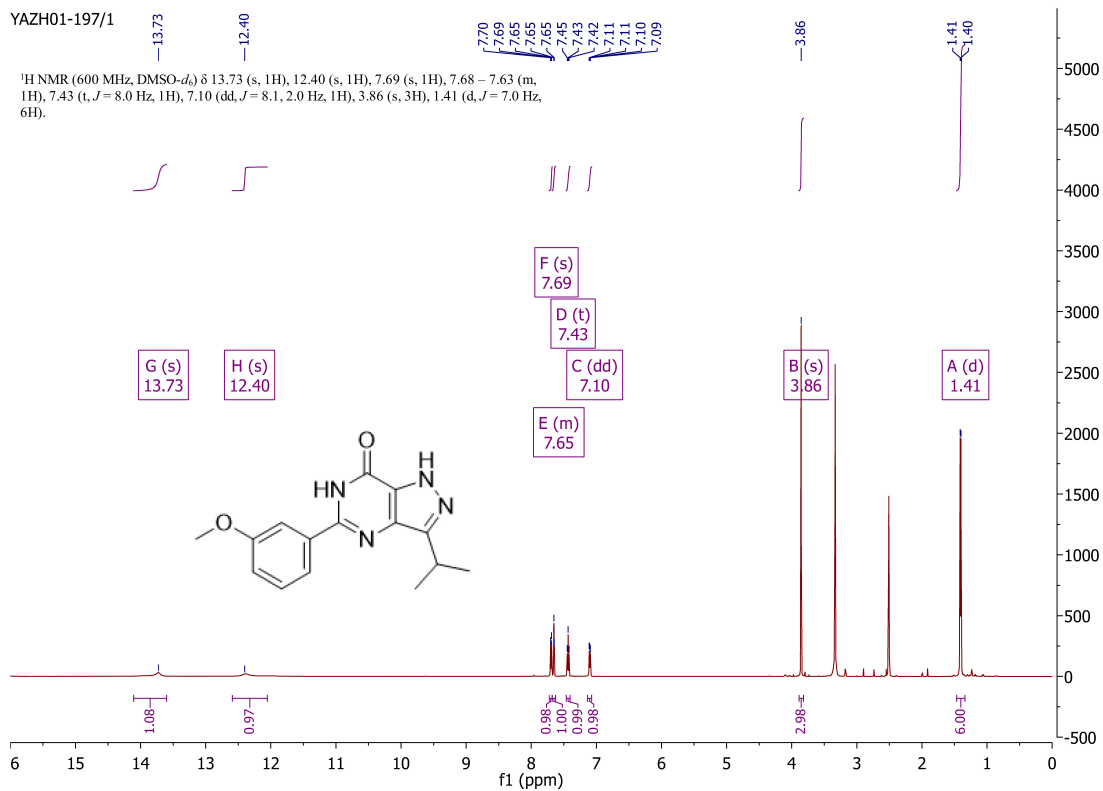

Figure S74. <sup>1</sup>H NMR spectrum of compound 26 (NPD-3375).

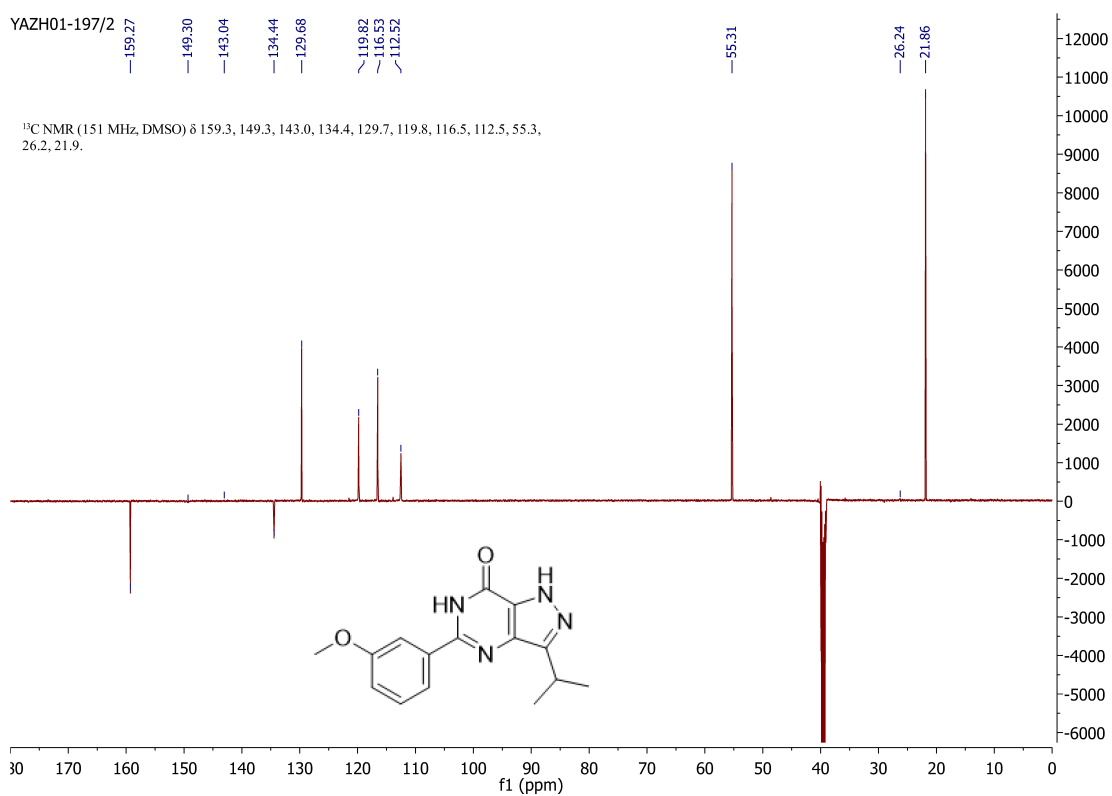

Figure S75. <sup>13</sup>C NMR spectrum of compound 26 (NPD-3375).

Acquired by : Admin  
 Date Acquired : 19/5/2016 5:09:21 PM  
 Sample Name : YAZH-132  
 Sample ID :  
 Tray# : 1  
 Vial# : 64  
 Injection Volume : 1  
 Data File : C:\LabSolutions\Data\2016 - wk20\YAZH-132.lcd  
 Background File : blanco 19052016.lcd  
 Method File : Method SCAN ACID standard.lcm  
 Report Format : DefaultLCMS1cr  
 Tuning File : C:\LabSolutions\Tuning\Tuning-ESI-pos-neg01072015a.lct  
 Processed by : Admin  
 Modified Date : 7/6/2019 4:39:41 PM

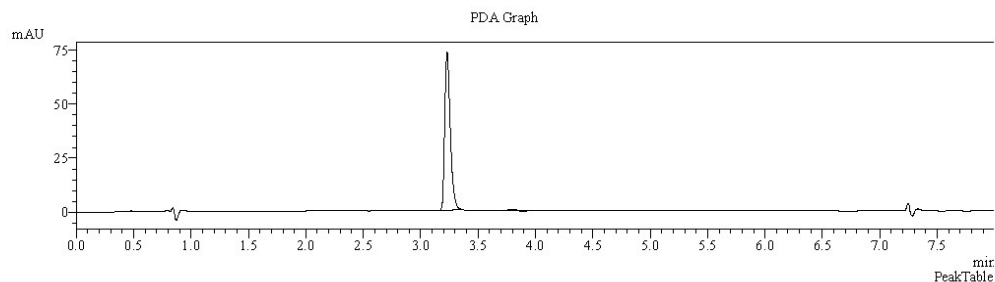

PDA Ch1 254nm 4nm

| Peak# | Name | Ret. Time | Area   | Area % |
|-------|------|-----------|--------|--------|
| 1     |      | 3.225     | 245962 | 99.351 |
| 2     |      | 3.795     | 1605   | 0.649  |

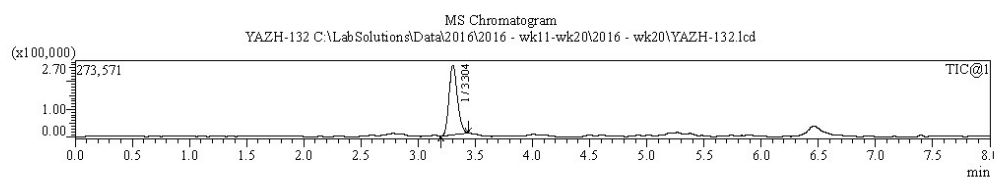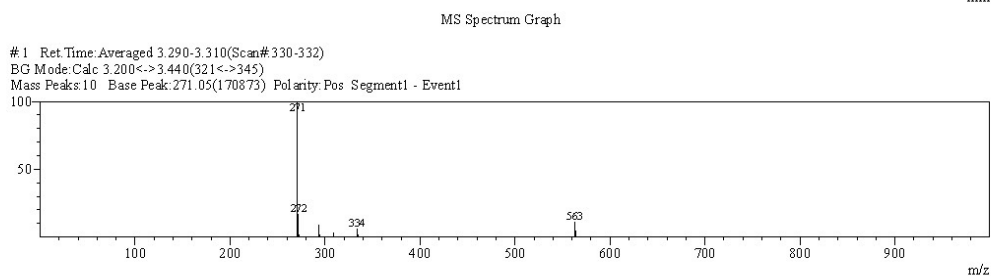

MS Spectrum Table

#1 Ret. Time:  
 BG Mode: Calc 3.200<->3.440(321<->345)  
 Mass Peaks: 10 Base Peak: 271.05(170873) Polarity: Pos Segment1 - Event1

| # | m/z    | Abs.Inten. | Rel.Inten. | Charge | Polarity | Monoisotopic | #  | m/z    | Abs.Inten. | Rel.Inten. | Charge | Polarity | Monoisotopic |
|---|--------|------------|------------|--------|----------|--------------|----|--------|------------|------------|--------|----------|--------------|
| 1 | 271.05 | 170873     | 100.00     |        |          |              | 6  | 309.05 | 5301       | 3.10       |        |          |              |
| 2 | 272.00 | 28445      | 16.65      |        |          |              | 7  | 334.00 | 9979       | 5.84       |        |          |              |
| 3 | 273.10 | 2799       | 1.64       |        |          |              | 8  | 335.00 | 2379       | 1.39       |        |          |              |
| 4 | 293.05 | 15035      | 8.80       |        |          |              | 9  | 563.20 | 18408      | 10.77      |        |          |              |
| 5 | 294.10 | 3082       | 1.80       |        |          |              | 10 | 564.25 | 7953       | 4.65       |        |          |              |

Figure S76. LCMS spectrum of compound **27** (NPD-2974).

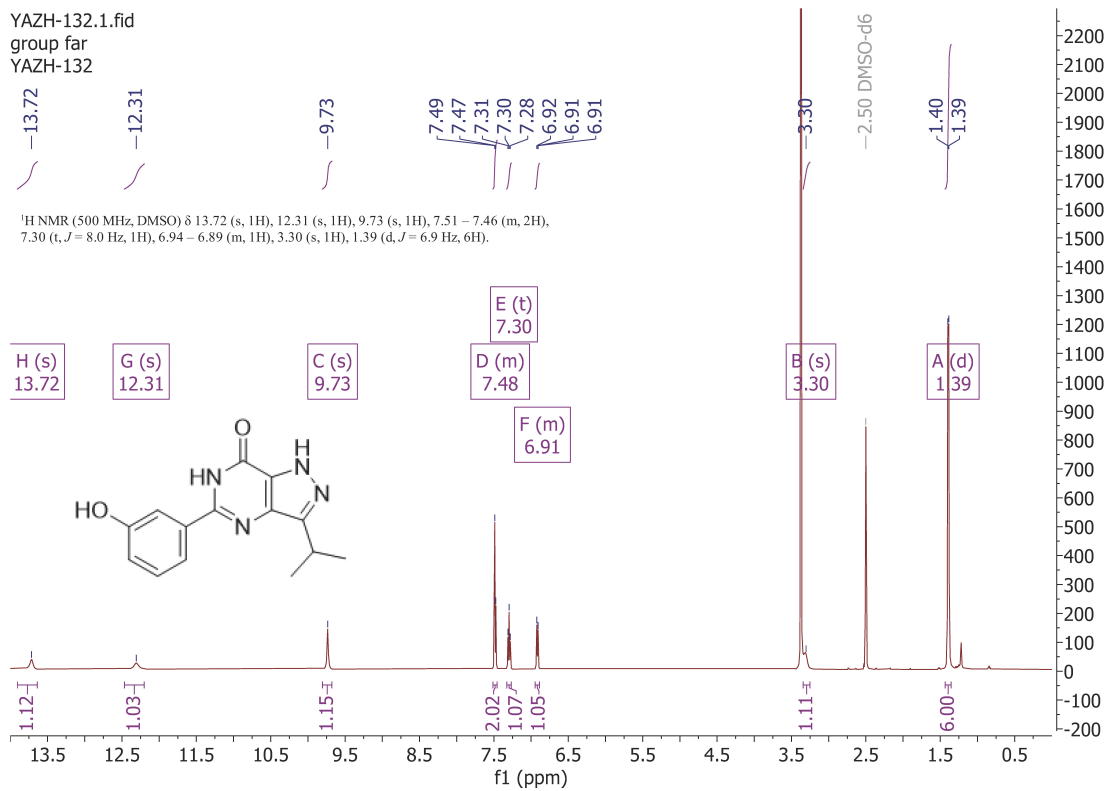

Figure S77. <sup>1</sup>H NMR spectrum of compound 27 (NPD-2974).

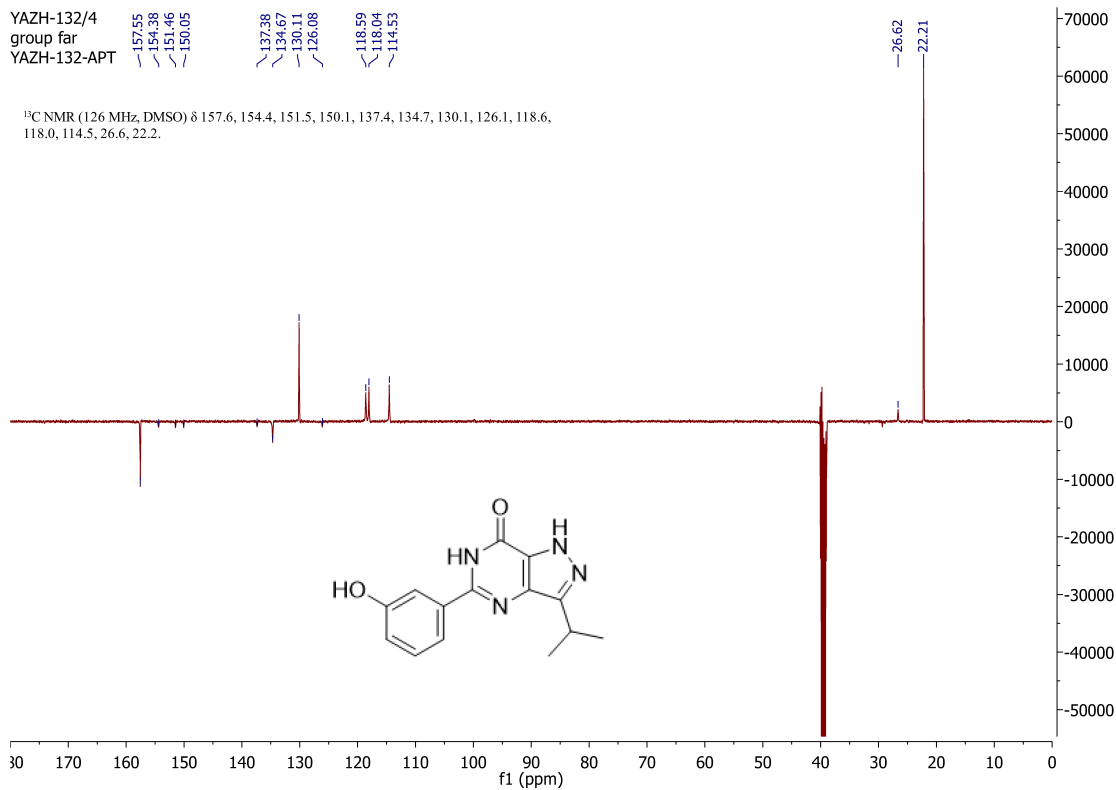

Figure S78. <sup>13</sup>C NMR spectrum of compound 27 (NPD-2974).

Acquired by : Admin  
 Date Acquired : 25/4/2018 6:05:16 PM  
 Sample Name : YAZH01-205  
 Sample ID :  
 Tray# : 1  
 Vial# : 4  
 Injection Volume : 3  
 Data File : C:\LabSolutions\Data\2018\2018-wk17\YAZH01-205.lcd  
 Background File : blanco 25042018.lcd  
 Method File : Method SCAN ACID standard.lcm  
 Report Format : Default.CMS.lcr  
 Tuning File : C:\LabSolutions\Tuning\Tuning-ESI-pos-neg01072015a.lct  
 Processed by : Admin  
 Modified Date : 26/4/2018 12:10:54 PM

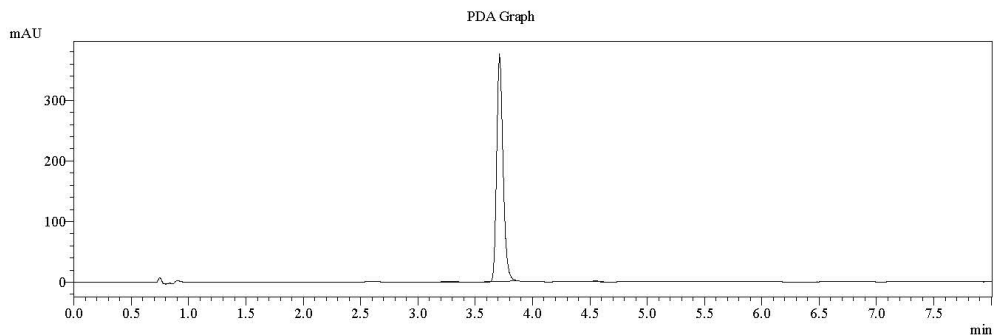

PDA Ch1 254nm 4nm

| Peak# | Name | Ret. Time | Area    | Area % |
|-------|------|-----------|---------|--------|
| 1     |      | 2.889     | 937     | 0.064  |
| 2     |      | 3.314     | 3541    | 0.242  |
| 3     |      | 3.707     | 1430372 | 99.147 |
| 4     |      | 4.339     | 1847    | 0.126  |
| 5     |      | 4.546     | 6154    | 0.421  |

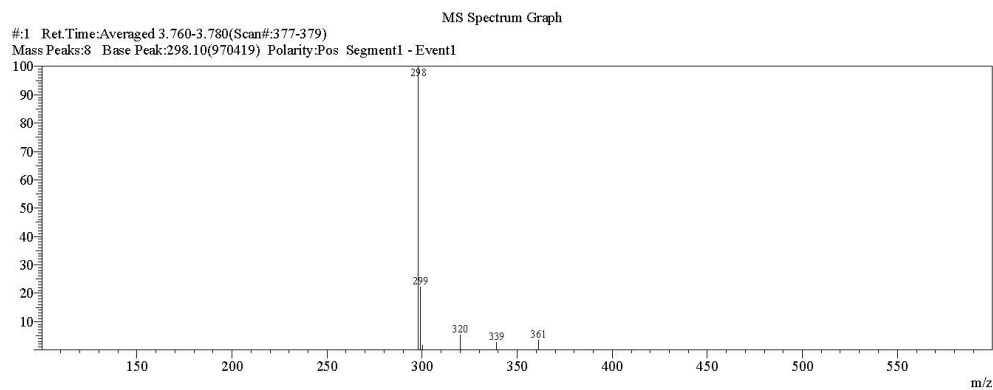

MS Spectrum Table

#1 Ret.Time:  
 BG Mode:Calc 3.650<->3.990(366<->400)

| # | m/z    | Abs.Inten. | Rel.Inten. | Charge | Polarity | Monoisotopic | # | m/z    | Abs.Inten. | Rel.Inten. | Charge | Polarity | Monoisotopic |
|---|--------|------------|------------|--------|----------|--------------|---|--------|------------|------------|--------|----------|--------------|
| 1 | 298.10 | 970419     | 100.00     |        |          |              | 5 | 339.15 | 24536      | 2.53       |        |          |              |
| 2 | 299.10 | 215493     | 22.21      |        |          |              | 6 | 361.15 | 33629      | 3.47       |        |          |              |
| 3 | 300.15 | 15720      | 1.62       |        |          |              | 7 | 617.35 | 36525      | 3.76       |        |          |              |
| 4 | 320.05 | 49590      | 5.11       |        |          |              | 8 | 618.30 | 16194      | 1.67       |        |          |              |

Figure S79. LCMS spectrum of compound **28** (NPD-3381).

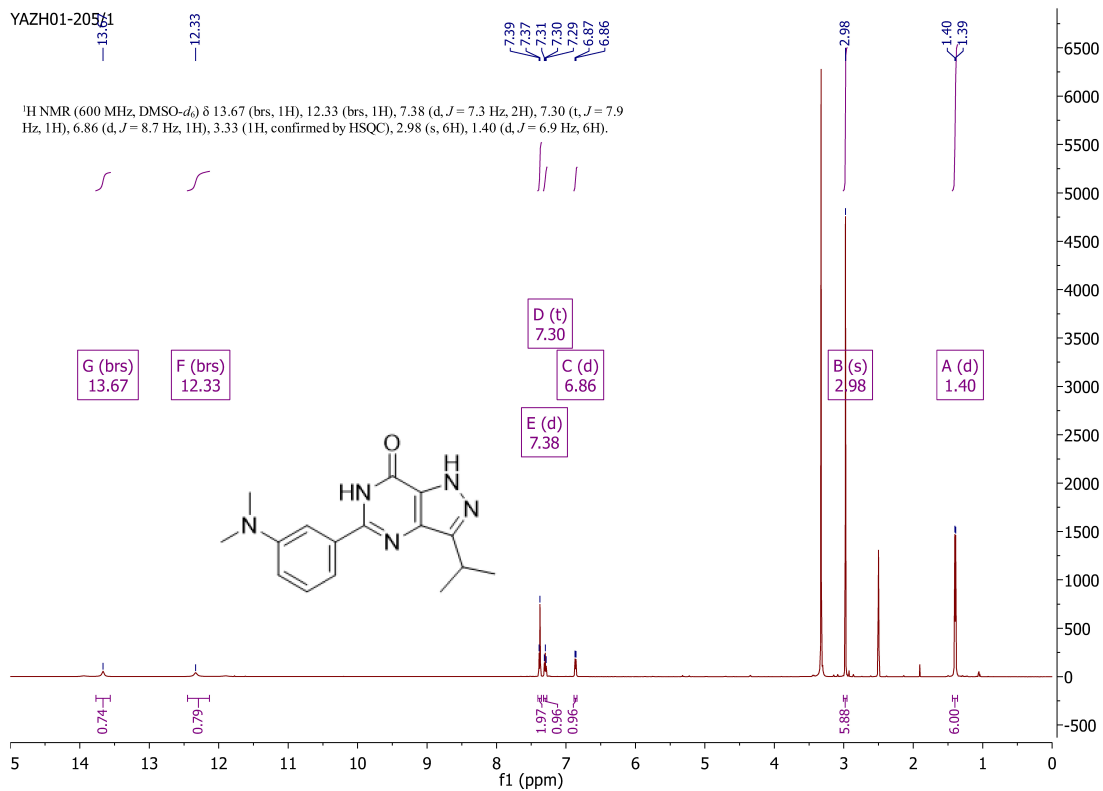

Figure S80.  $^1\text{H NMR}$  spectrum of compound **28** (NPD-3381).

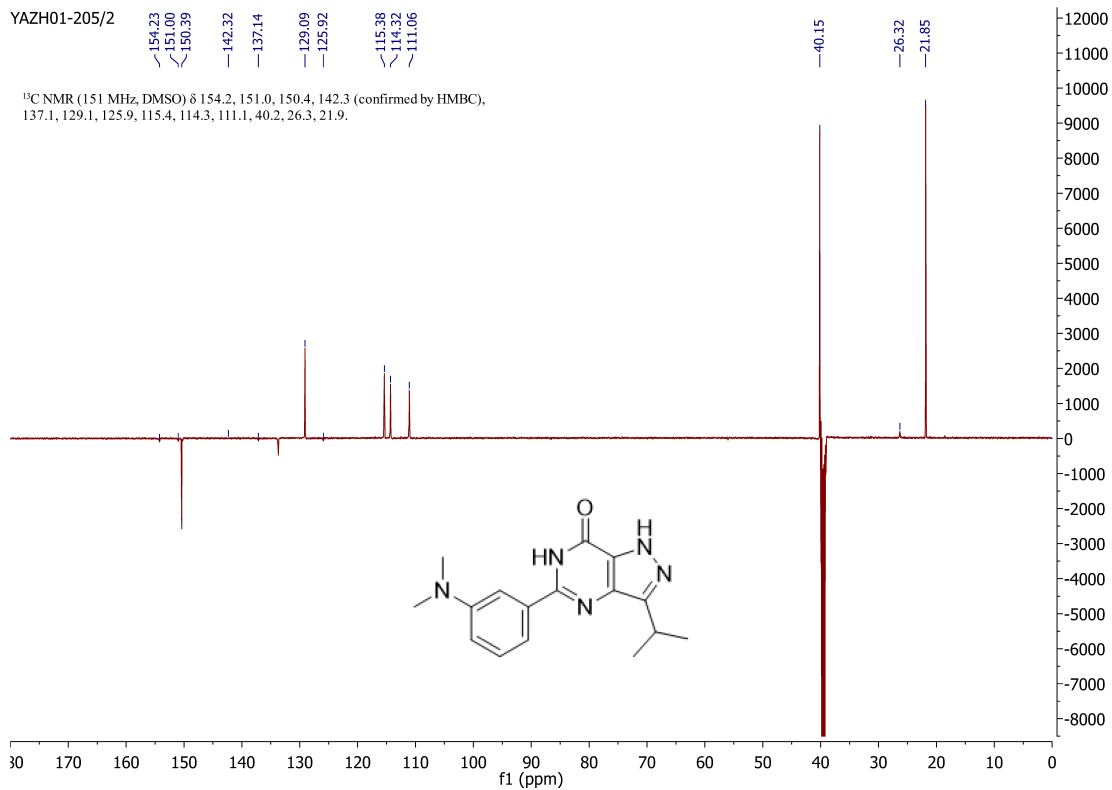

Figure S81.  $^{13}\text{C NMR}$  spectrum of compound **28** (NPD-3381).

Acquired by : Admin  
 Date Acquired : 21/12/2018 10:46:27 AM  
 Sample Name : SHGI05\_2  
 Sample ID :  
 Tray# : 1  
 Vial# : 4  
 Injection Volume : 3  
 Data File : C:\LabSolutions\Data\2018\2018-wk51\SHGI05\_2\_1.ccd  
 Background File : blanco 21122018.lcd  
 Method File : Method SCAN ACID standard.lcm  
 Report Format : DefaultLCMS.lcr  
 Tuning File : C:\LabSolutions\Tuning\Tuning-ESI-pos-neg01072015a.lct  
 Processed by : Admin  
 Modified Date : 18/6/2019 10:14:24 AM

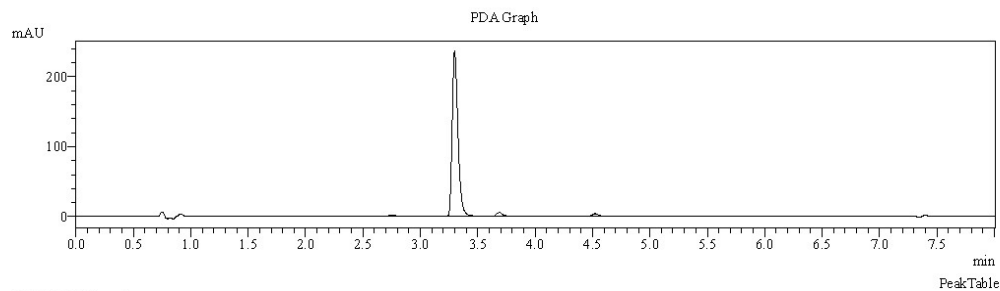

PDA Ch1 254nm 4nm

| Peak# | Name | Ret. Time | Area   | Area%  |
|-------|------|-----------|--------|--------|
| 1     |      | 2.747     | 7230   | 0.852  |
| 2     |      | 3.294     | 809544 | 95.376 |
| 3     |      | 3.683     | 17912  | 2.110  |
| 4     |      | 4.516     | 14102  | 1.661  |

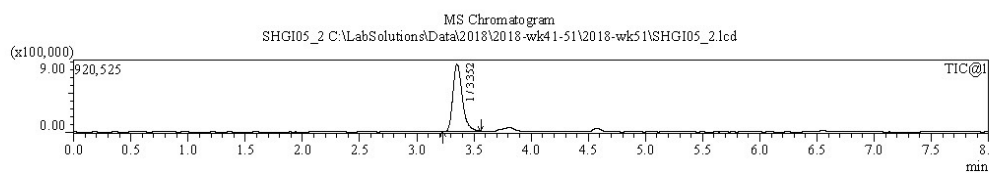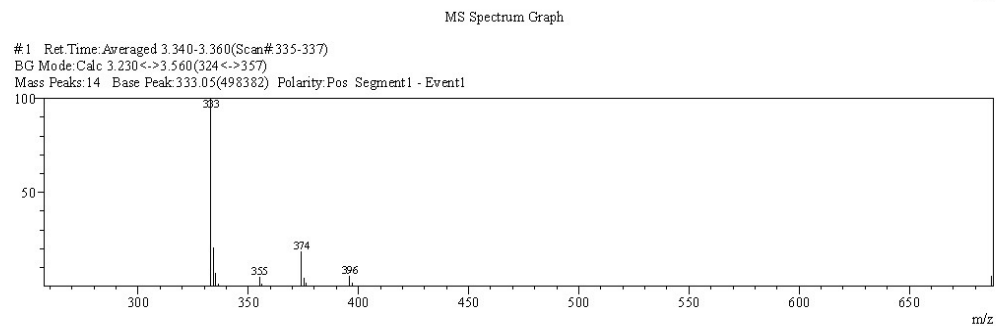

MS Spectrum Table

#1 Ret. Time: Averaged 3.340-3.360 (Scan# 335-337)  
 BG Mode: Calc 3.230<->3.560 (324<->357)  
 Mass Peaks: 14 Base Peak: 333.05 (498382) Polarity: Pos Segment1 - Event1

| # | m/z    | Abs.Inten. | Rel.Inten. | Charge | Polarity | Monoisotopic | #  | m/z    | Abs.Inten. | Rel.Inten. | Charge | Polarity | Monoisotopic |
|---|--------|------------|------------|--------|----------|--------------|----|--------|------------|------------|--------|----------|--------------|
| 1 | 257.20 | 9138       | 1.83       |        |          |              | 8  | 374.10 | 91822      | 18.42      |        |          |              |
| 2 | 333.05 | 498382     | 100.00     |        |          |              | 9  | 375.10 | 20034      | 4.02       |        |          |              |
| 3 | 334.05 | 101411     | 20.35      |        |          |              | 10 | 376.05 | 8535       | 1.71       |        |          |              |
| 4 | 335.05 | 33151      | 6.65       |        |          |              | 11 | 396.05 | 26666      | 5.35       |        |          |              |
| 5 | 336.20 | 5043       | 1.01       |        |          |              | 12 | 397.10 | 7213       | 1.45       |        |          |              |
| 6 | 355.10 | 22675      | 4.55       |        |          |              | 13 | 687.20 | 26306      | 5.28       |        |          |              |
| 7 | 356.10 | 6371       | 1.28       |        |          |              | 14 | 688.30 | 9073       | 1.82       |        |          |              |

Figure S82. LCMS spectrum of compound **29** (NPD-3598).

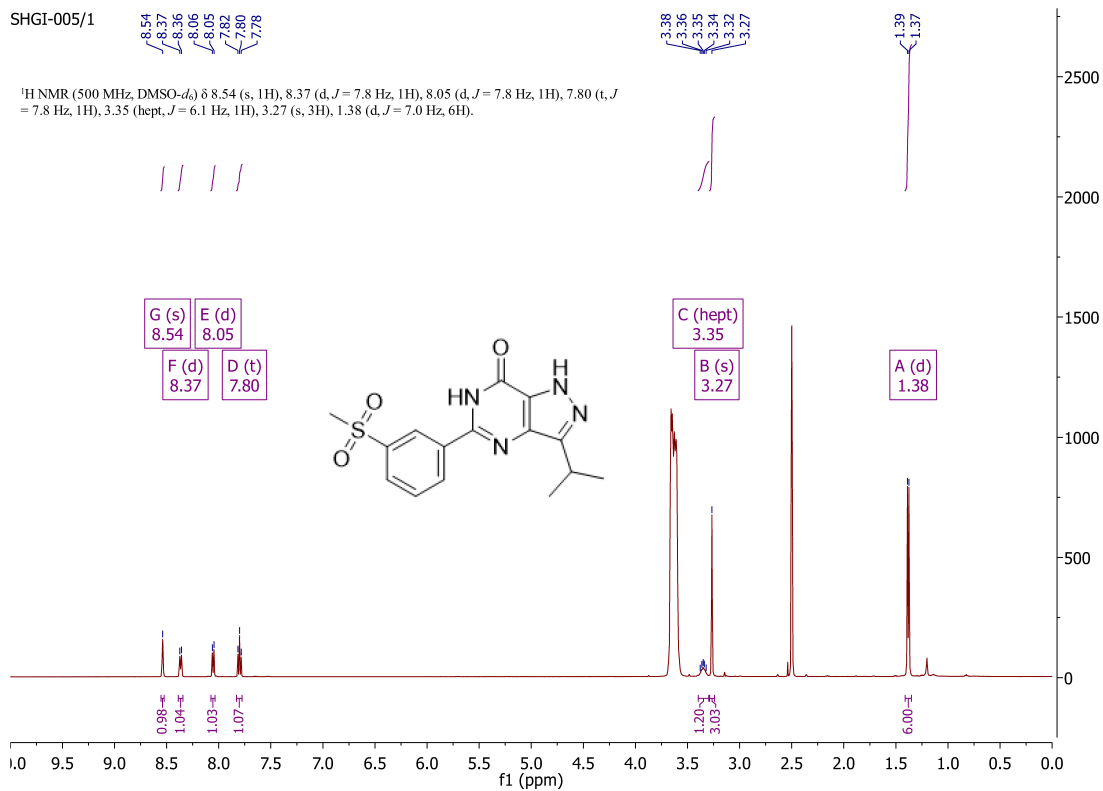

Figure S83.  $^1\text{H NMR}$  spectrum of compound **29** (NPD-3598).

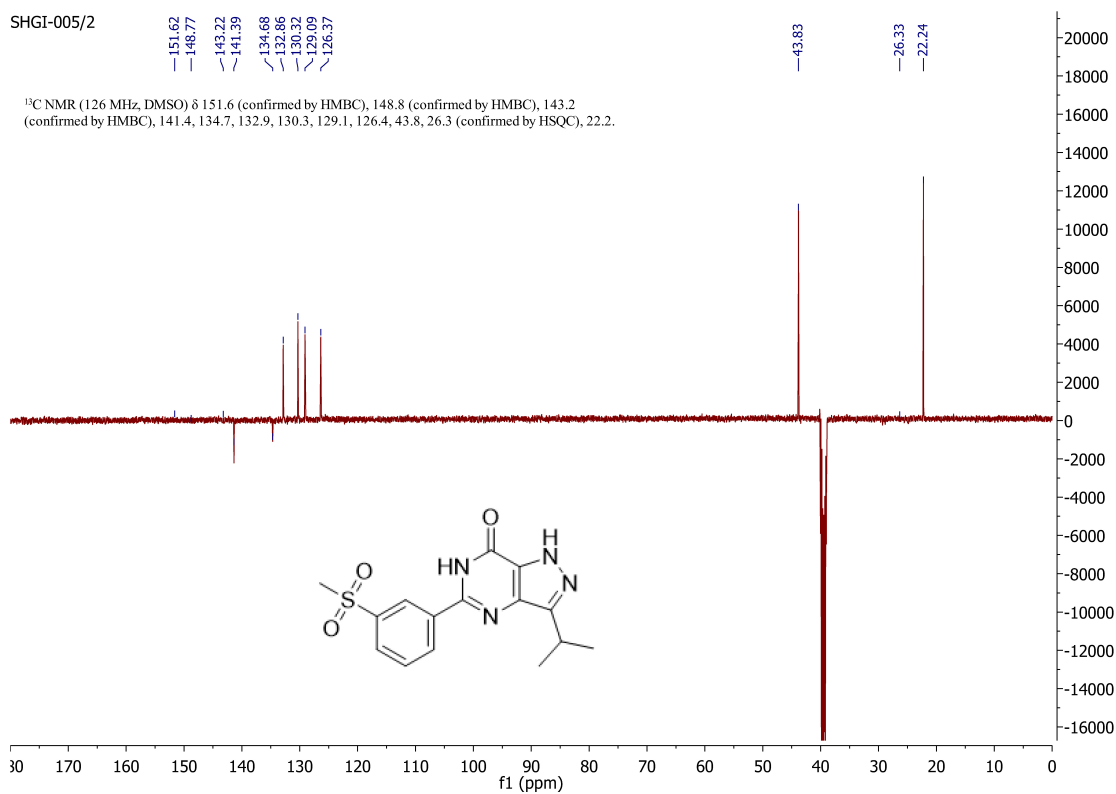

Figure S84.  $^{13}\text{C NMR}$  spectrum of compound **29** (NPD-3598).

Acquired by : Admin  
 Date Acquired : 1/11/2017 10:01:55 AM  
 Sample Name : YAZH01-165  
 Sample ID :  
 Tray# : 1  
 Vial# : 1  
 Injection Volume : 5  
 Data File : C:\LabSolutions\Data\2017\2017-wk44\YAZH01-165.lcd  
 Background File : blanco 01112017.lcd  
 Method File : Method SCAN ACID standard.lcm  
 Report Format : DefaultLCMS1cr  
 Tuning File : C:\LabSolutions\Tuning\Tuning-ESI-pos-neg01072015a1ct  
 Processed by : Admin  
 Modified Date : 1/11/2017 11:59:11 AM

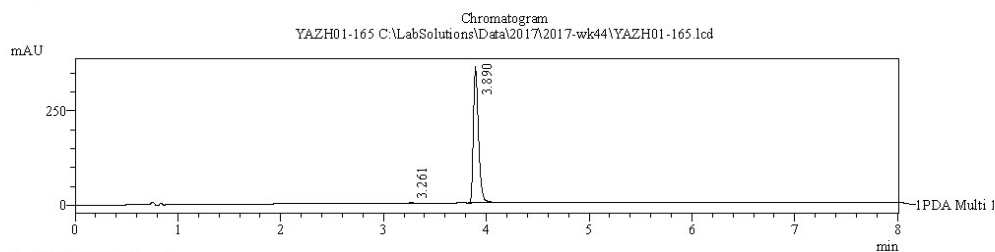

PeakTable

| Peak# | Name | Ret. Time | Area    | Area % |
|-------|------|-----------|---------|--------|
| 1     |      | 3.261     | 4864    | 0.398  |
| 2     |      | 3.890     | 1217617 | 99.602 |

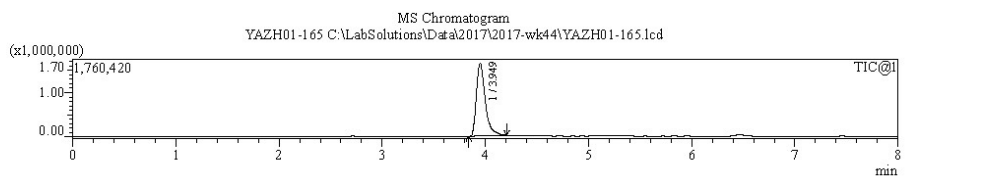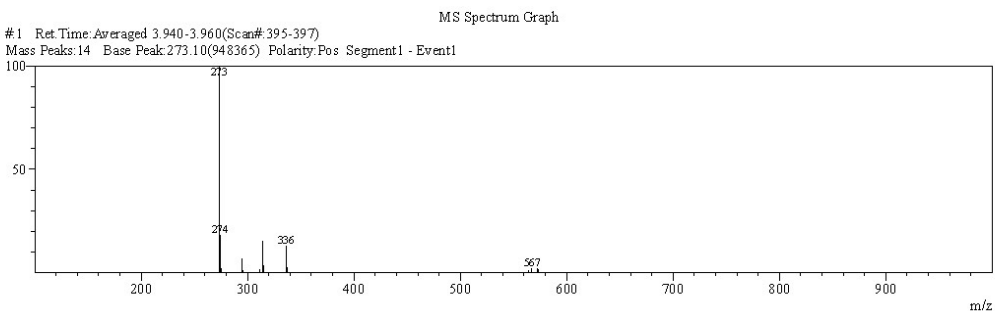

MS Spectrum Table

| # | m/z    | Abs.Inten. | Rel.Inten. | Charge | Polarity | Monoisotopic | #  | m/z    | Abs.Inten. | Rel.Inten. | Charge | Polarity | Monoisotopic |
|---|--------|------------|------------|--------|----------|--------------|----|--------|------------|------------|--------|----------|--------------|
| 1 | 273.10 | 948365     | 100.00     |        |          |              | 8  | 315.10 | 29998      | 3.16       |        |          |              |
| 2 | 274.10 | 171950     | 18.13      |        |          |              | 9  | 336.10 | 121309     | 12.79      |        |          |              |
| 3 | 275.10 | 19070      | 2.01       |        |          |              | 10 | 337.15 | 24569      | 2.59       |        |          |              |
| 4 | 295.05 | 61831      | 6.52       |        |          |              | 11 | 564.45 | 10160      | 1.07       |        |          |              |
| 5 | 296.05 | 10385      | 1.10       |        |          |              | 12 | 567.25 | 19003      | 2.00       |        |          |              |
| 6 | 311.00 | 12838      | 1.35       |        |          |              | 13 | 572.25 | 18700      | 1.97       |        |          |              |
| 7 | 314.10 | 144095     | 15.19      |        |          |              | 14 | 572.90 | 15214      | 1.60       |        |          |              |

Figure S85. LCMS spectrum of compound **30** (NPD-2975).



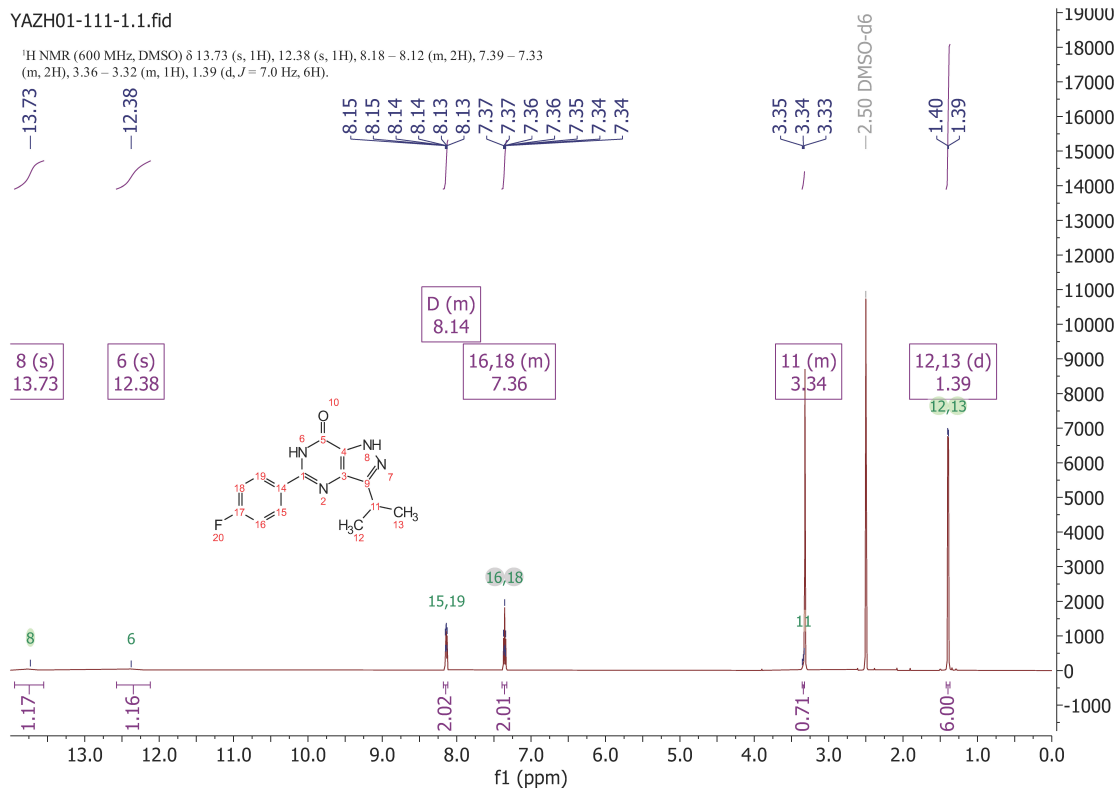

Figure S86. <sup>1</sup>H NMR spectrum of compound **30** (NPD-2975).

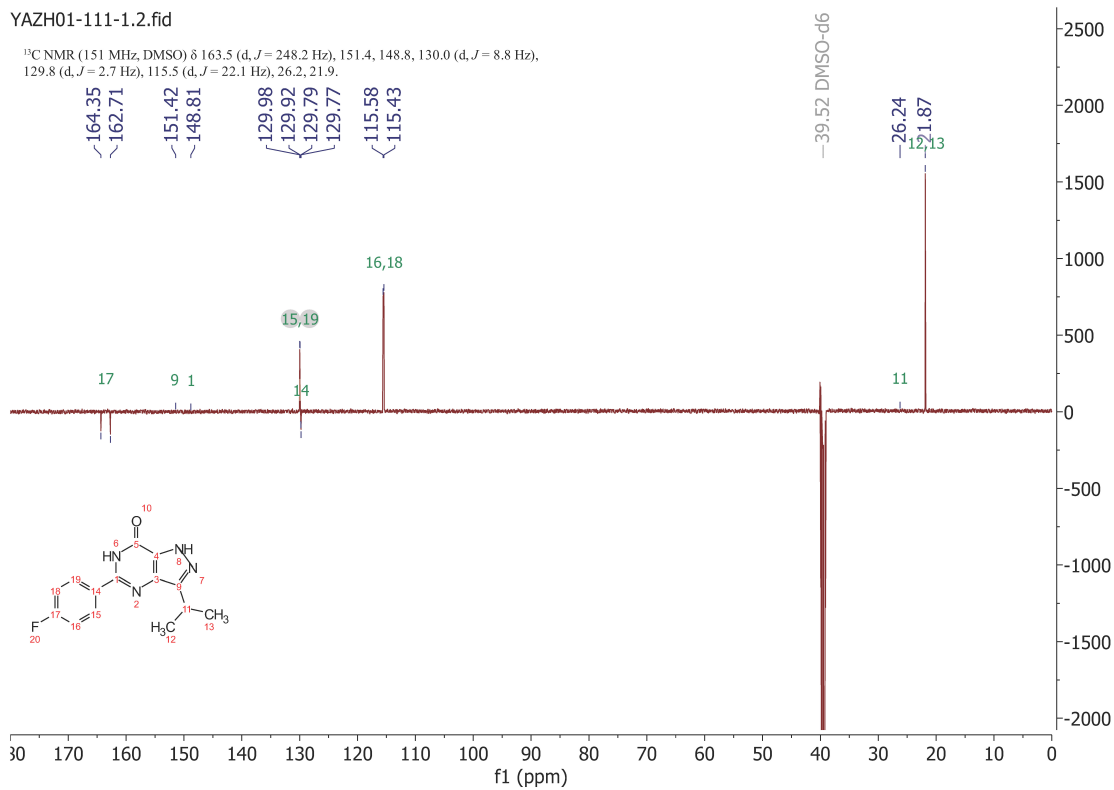

Figure S87. <sup>13</sup>C NMR spectrum of compound **30** (NPD-2975).

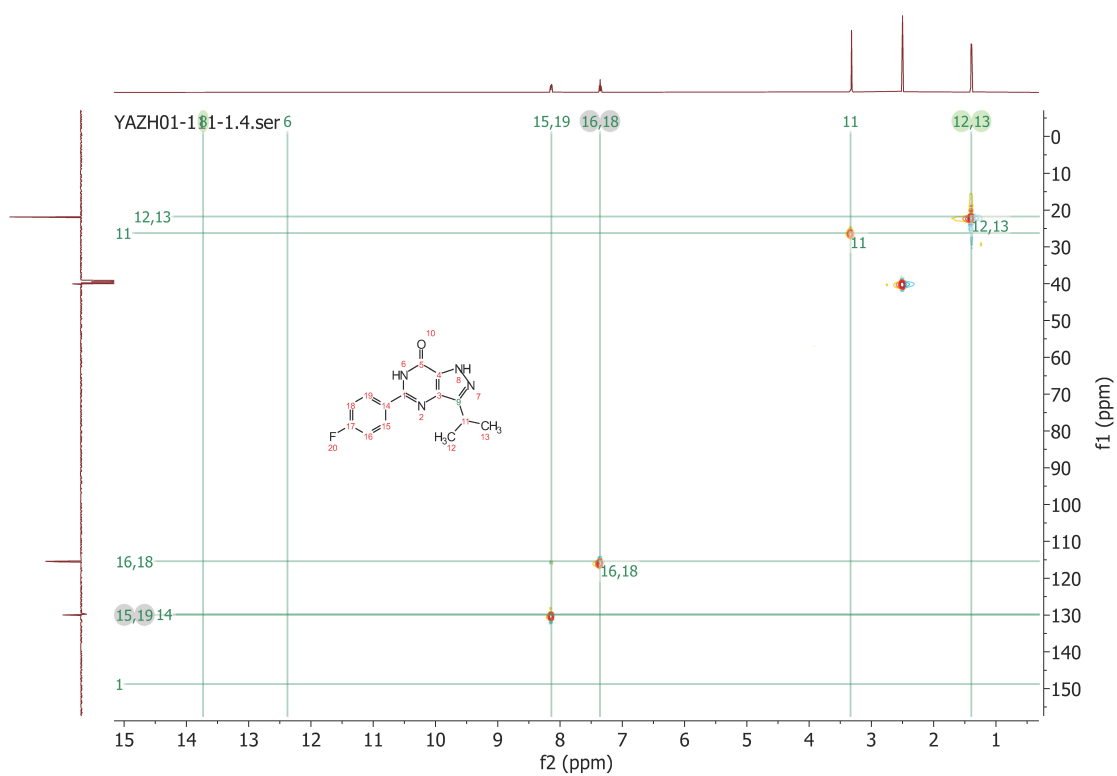

Figure S88. HSQC spectrum of compound **30** (NPD-2975).

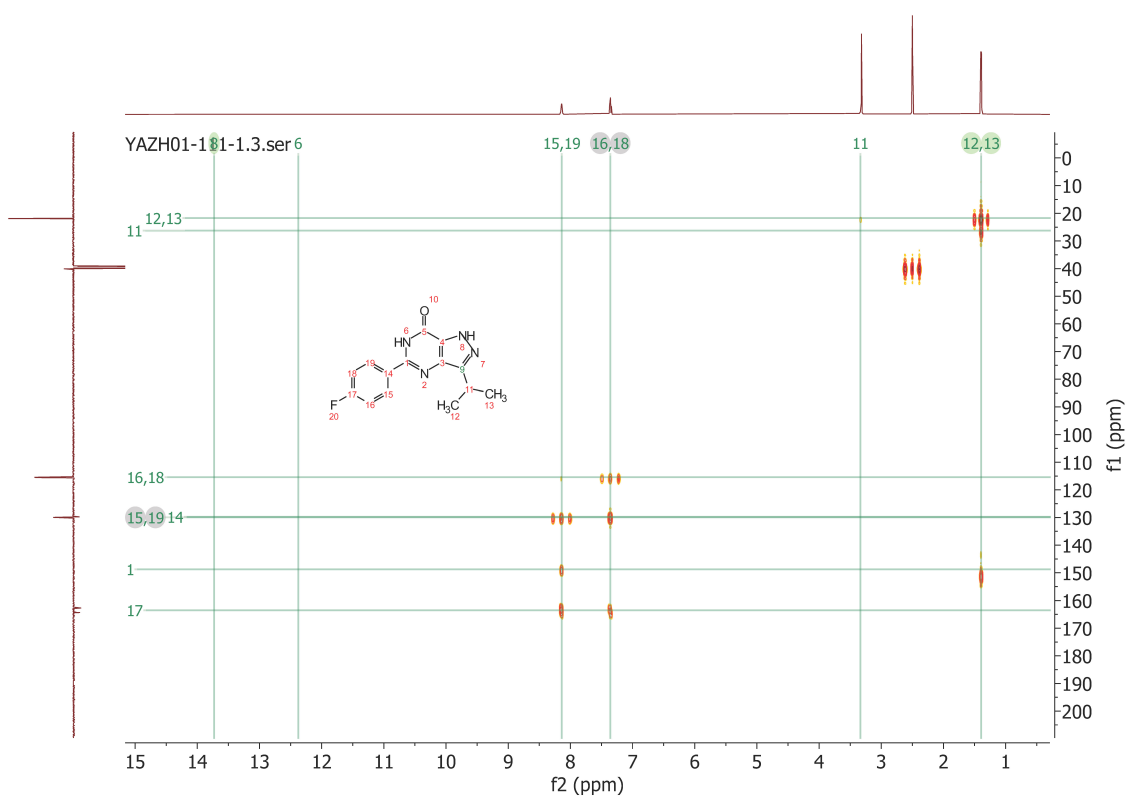

Figure S89. HMBC spectrum of compound **30** (NPD-2975).

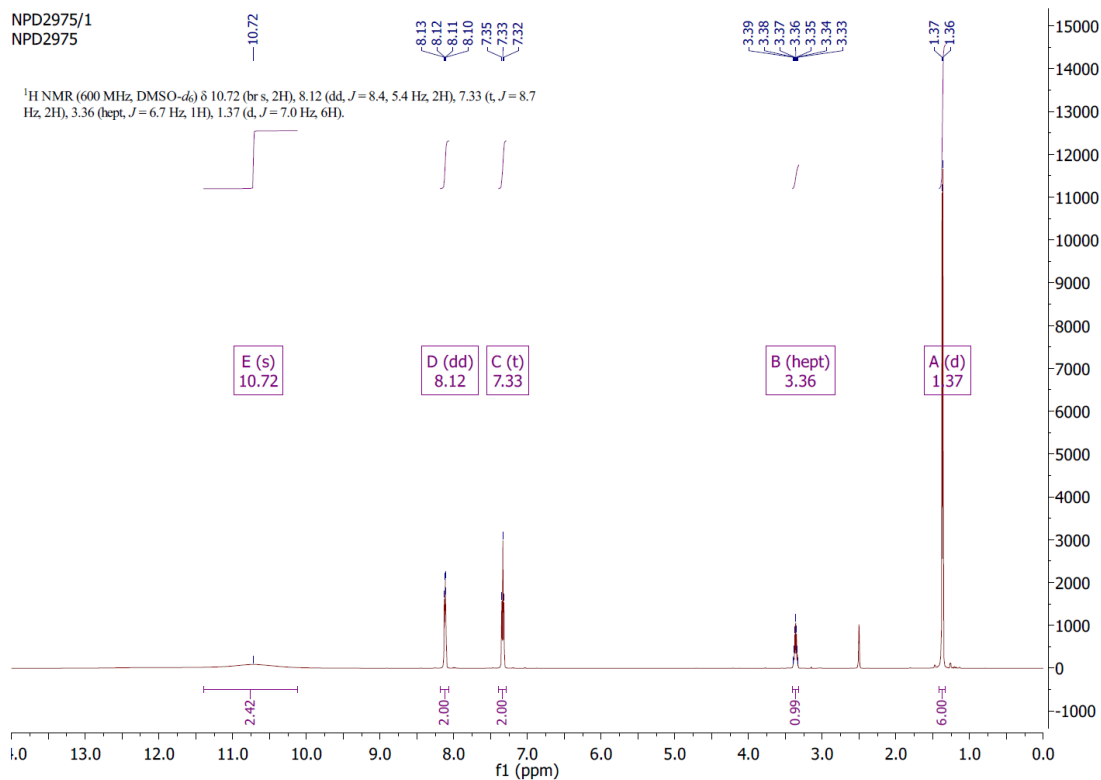

Figure S90. <sup>1</sup>H NMR spectrum of **30**·xHCl.

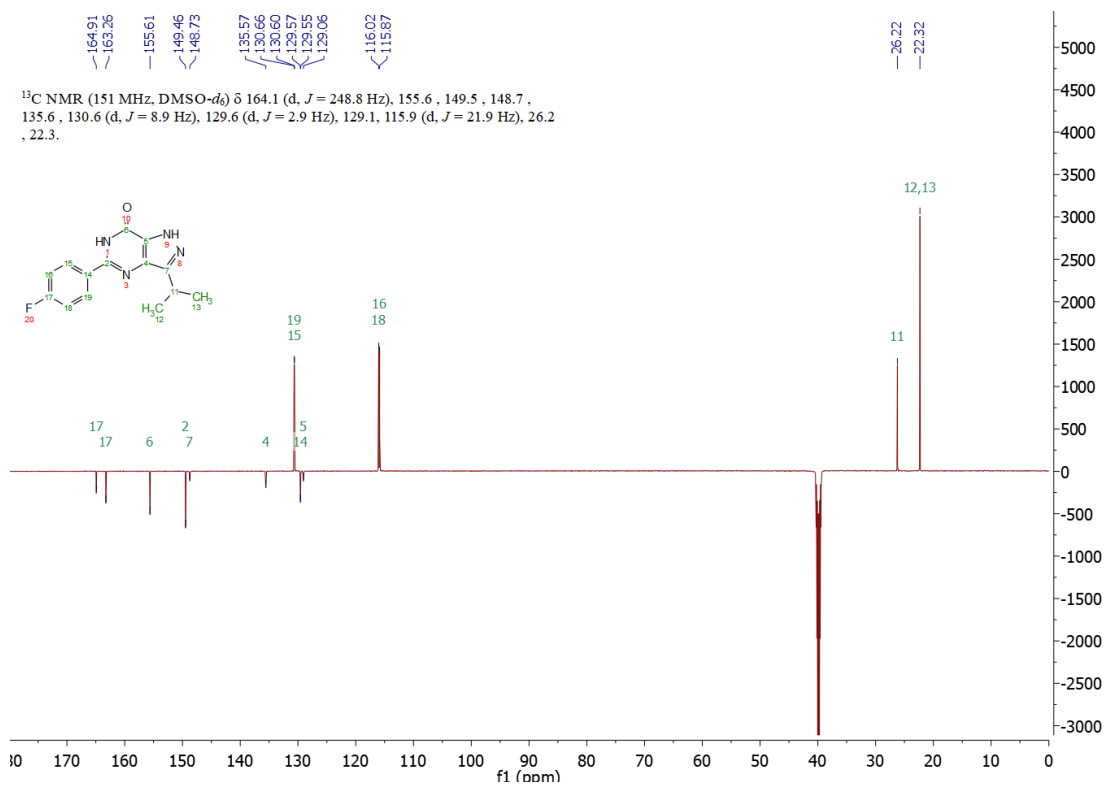

Figure S91. <sup>13</sup>C NMR spectrum of **30**·xHCl.

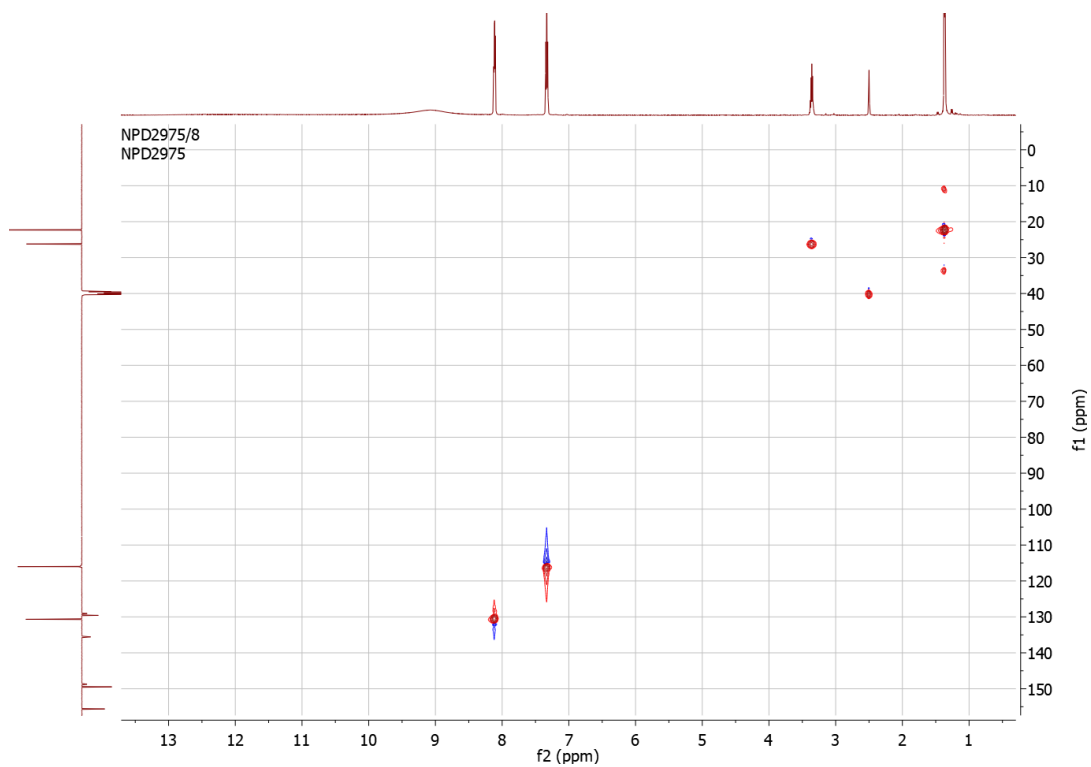

Figure S92. HSQC spectrum of **30**·xHCl.

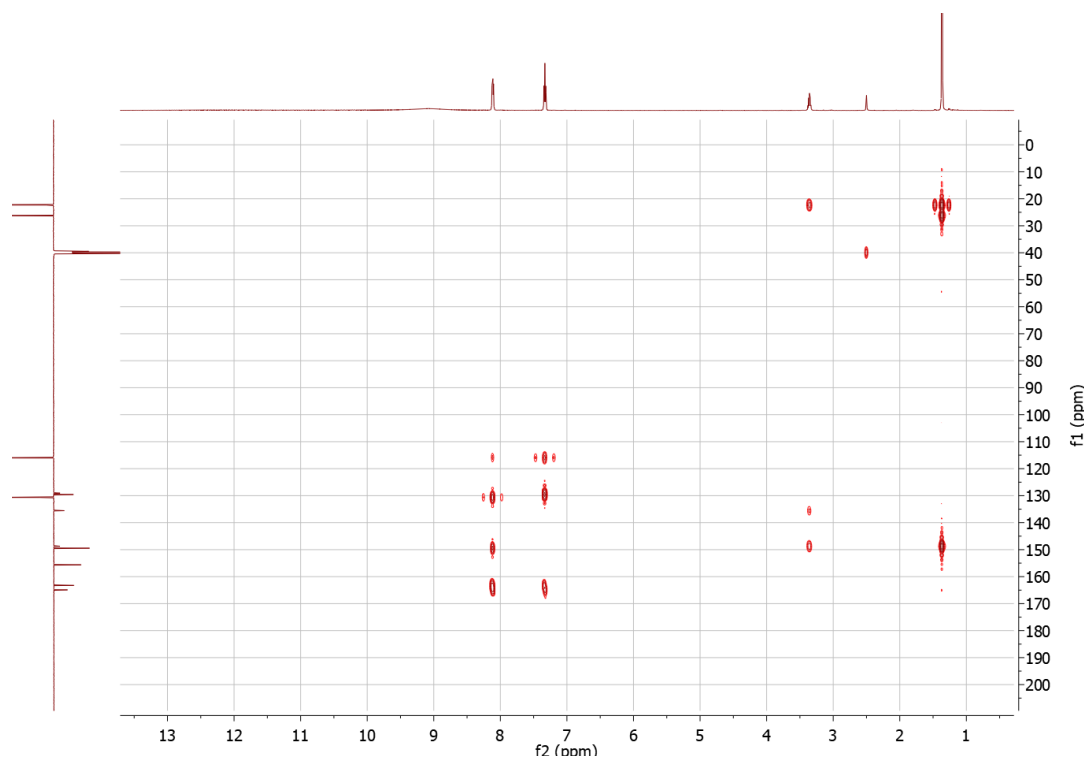

Figure S93. HMBC spectrum of **30**·xHCl.

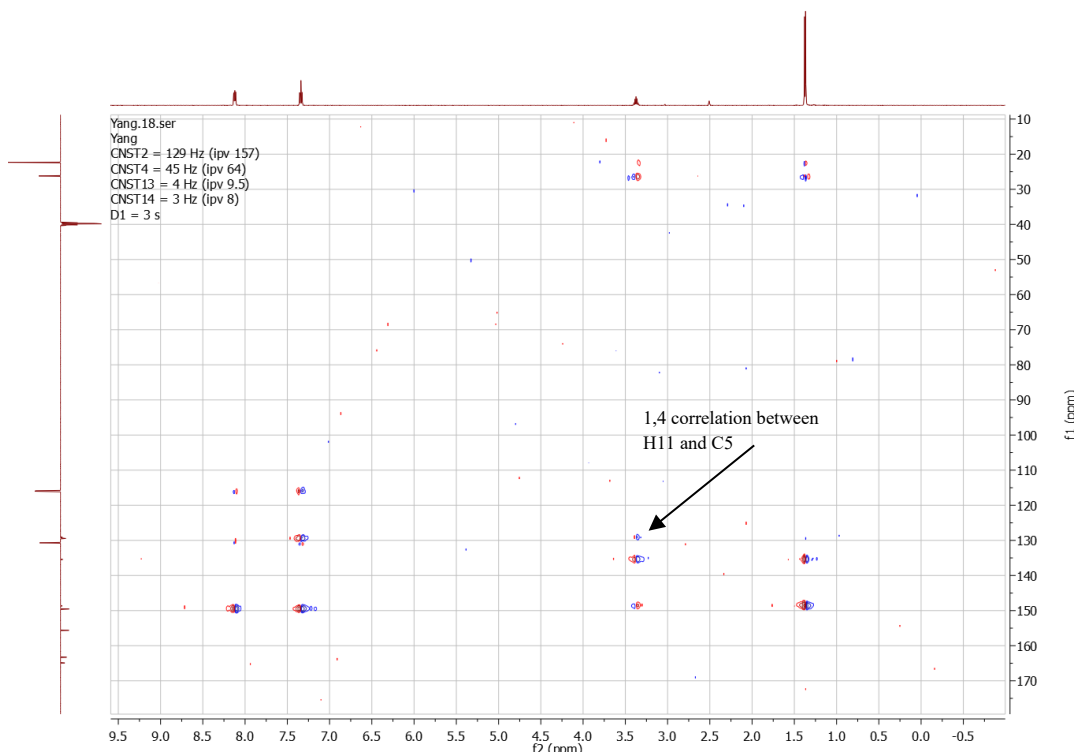

Figure S94. 1, n-ADEQUATE spectrum of  $30 \cdot x\text{HCl}$ .

Acquired by : Admin  
 Date Acquired : 3/7/2019 12:38:00 PM  
 Sample Name : VUF16258  
 Sample ID :  
 Tray# : 1  
 Vial# : 16  
 Injection Volume : 3  
 Data File : C:\LabSolutions\Data\2019\2019-wk27\VUF16258.lcd  
 Background File : blanco 03072019.lcd  
 Method File : Method SCAN.ACID.standard.lcm  
 Report Format : DefaultLCMS.lcr  
 Tuning File : C:\LabSolutions\Tuning\Tuning-ESI-pos-neg01072015a.lct  
 Processed by : Admin  
 Modified Date : 3/7/2019 1:00:26 PM

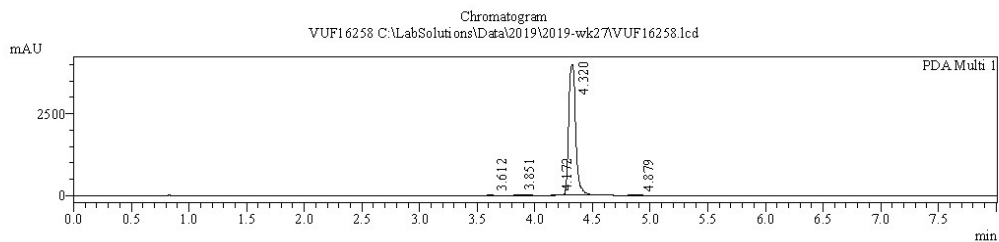

PeakTab1

| Peak# | Name | Ret. Time | Area     | Area % |
|-------|------|-----------|----------|--------|
| 1     |      | 3.612     | 49161    | 0.290  |
| 2     |      | 3.851     | 136099   | 0.803  |
| 3     |      | 4.172     | 80388    | 0.474  |
| 4     |      | 4.320     | 16651820 | 98.220 |
| 5     |      | 4.879     | 36047    | 0.213  |

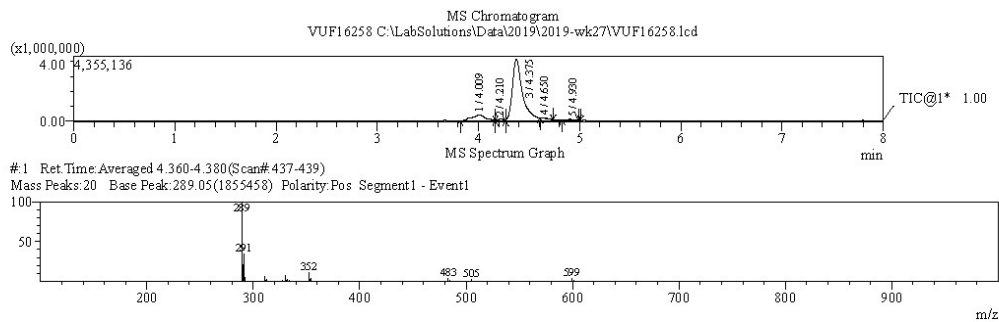

MS Spectrum Table

| #  | m/z    | Abs.Inten. | Rel.Inten. | Charge | Polarity | Monoisotopic | #  | m/z    | Abs.Inten. | Rel.Inten. | Charge | Polarity | Monoisotopic |
|----|--------|------------|------------|--------|----------|--------------|----|--------|------------|------------|--------|----------|--------------|
| 1  | 289.05 | 1855458    | 100.00     |        |          |              | 11 | 332.05 | 49527      | 2.67       |        |          |              |
| 2  | 290.00 | 382010     | 20.59      |        |          |              | 12 | 334.10 | 21179      | 1.14       |        |          |              |
| 3  | 291.00 | 631041     | 34.01      |        |          |              | 13 | 352.00 | 198202     | 10.68      |        |          |              |
| 4  | 292.00 | 97642      | 5.26       |        |          |              | 14 | 353.00 | 37343      | 2.01       |        |          |              |
| 5  | 311.00 | 106208     | 5.72       |        |          |              | 15 | 354.05 | 64047      | 3.45       |        |          |              |
| 6  | 312.05 | 20916      | 1.13       |        |          |              | 16 | 483.20 | 65350      | 3.52       |        |          |              |
| 7  | 313.00 | 38894      | 2.10       |        |          |              | 17 | 485.15 | 23119      | 1.25       |        |          |              |
| 8  | 327.00 | 24731      | 1.33       |        |          |              | 18 | 505.15 | 44990      | 2.42       |        |          |              |
| 9  | 330.00 | 141151     | 7.61       |        |          |              | 19 | 599.15 | 61199      | 3.30       |        |          |              |
| 10 | 331.00 | 29256      | 1.58       |        |          |              | 20 | 601.15 | 33455      | 1.80       |        |          |              |

Figure S95. LCMS spectrum of compound 31 (NPD-3204).

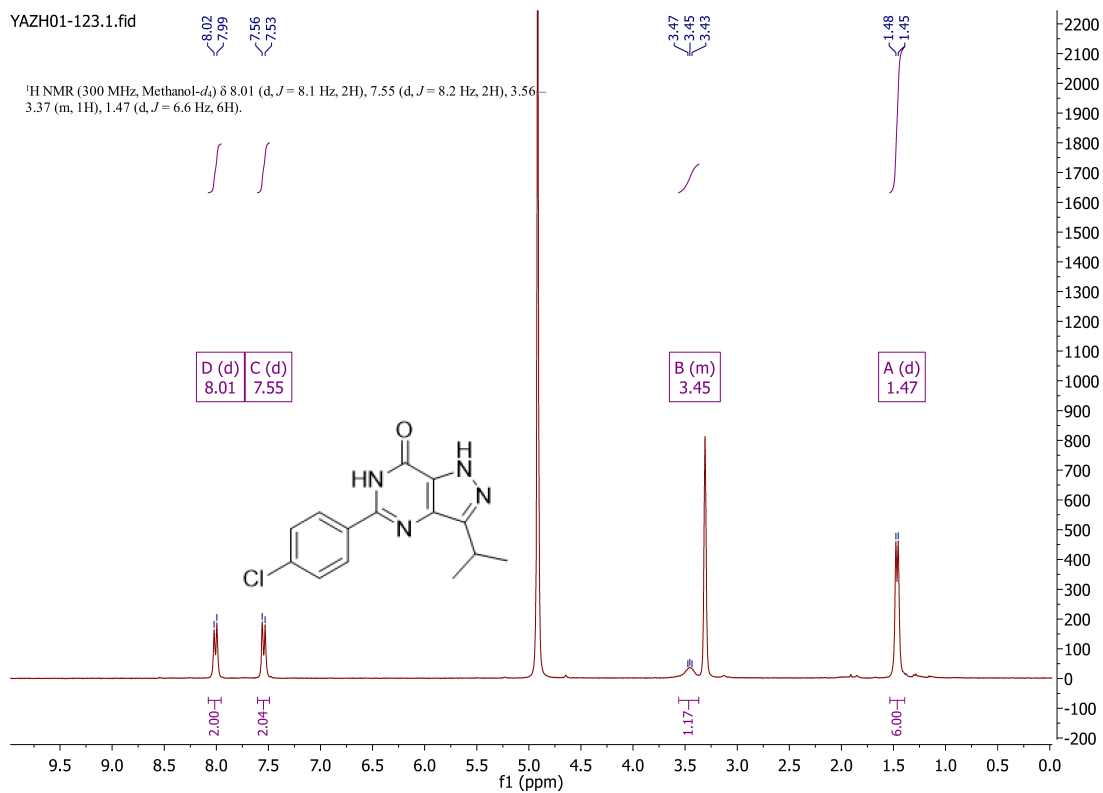

Figure S96. <sup>1</sup>H NMR spectrum of compound **31** (NPD-3204).

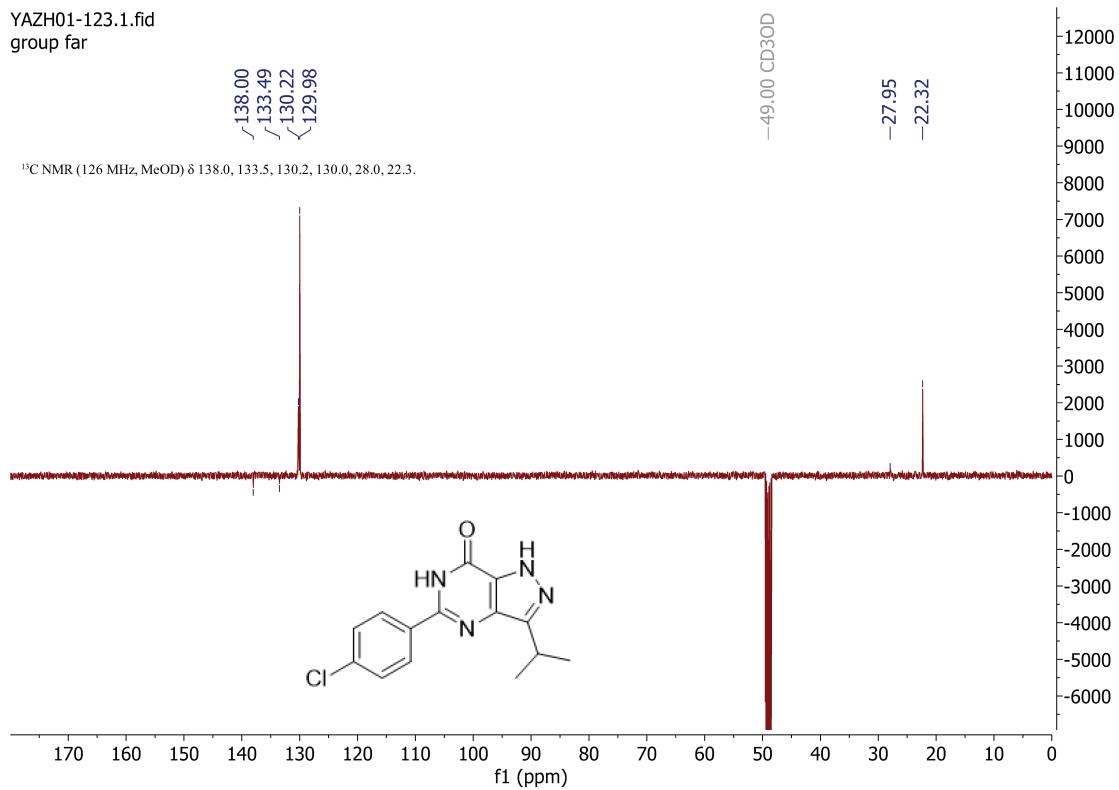

Figure S97. <sup>13</sup>C NMR spectrum of compound **31** (NPD-3204).

Acquired by : Admin  
 Date Acquired : 5/13/2016 6:38:45 PM  
 Sample Name : YAZH-129  
 Sample ID :  
 Tray# : 1  
 Vial# : 31  
 Injection Volume : 1  
 Data File : C:\LabSolutions\Data\2016 - wk19\YAZH-129.lcd  
 Background File : blanco 13052016.lcd  
 Method File : Method SCAN ACID standard.lcm  
 Report Format : DefaultL.CMS.lcr  
 Tuning File : C:\LabSolutions\Tuning\Tuning-ESI-pos-neg01072015a.lct  
 Processed by : Admin  
 Modified Date : 5/17/2016 8:55:03 AM

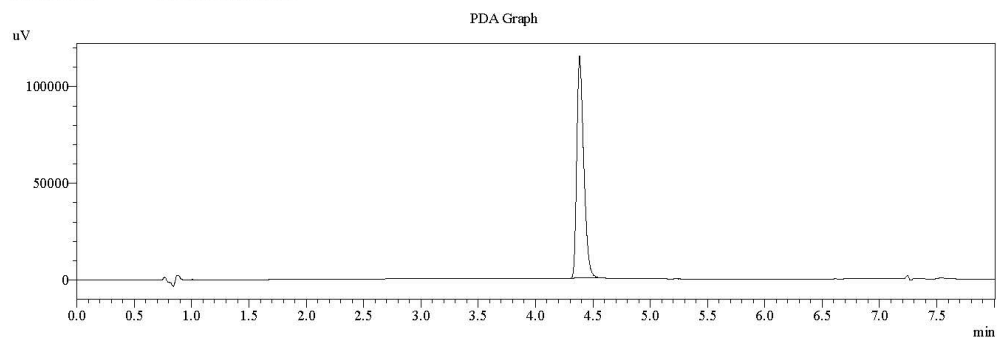

PDA Ch1 254nm 4nm

| Peak# | Name | Ret. Time | Area   | Area %  |
|-------|------|-----------|--------|---------|
| 1     |      | 4.379     | 478820 | 100.000 |

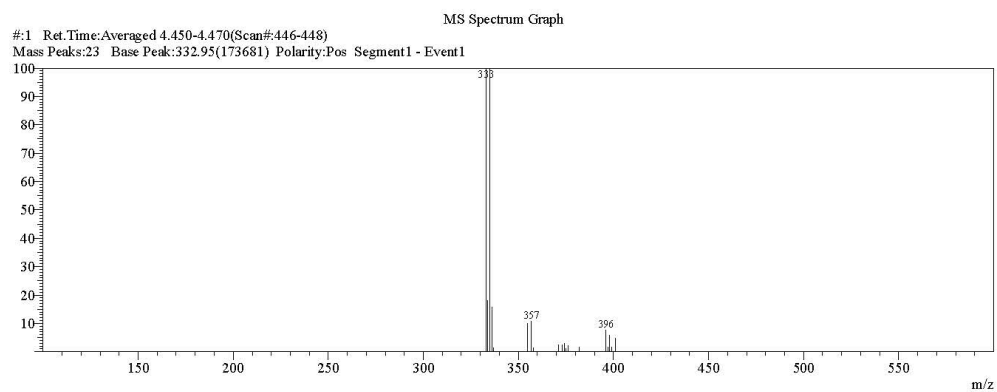

MS Spectrum Table

#1 Ret.Time:  
 BG Mode:Calc 4.340<=>4.680(435<=>469)  
 Mass Peaks:23 Base Peak:332.95(173681) Polarity:Pos Segment1 - Event1

| #  | m/z    | Abs.Inten. | Rel.Inten. | Charge | Polarity | Monoisotopic | #  | m/z    | Abs.Inten. | Rel.Inten. | Charge | Polarity | Monoisotopic |
|----|--------|------------|------------|--------|----------|--------------|----|--------|------------|------------|--------|----------|--------------|
| 1  | 332.95 | 173681     | 100.00     |        |          |              | 13 | 375.95 | 3745       | 2.16       |        |          |              |
| 2  | 333.95 | 31130      | 17.92      |        |          |              | 14 | 381.95 | 2760       | 1.59       |        |          |              |
| 3  | 334.95 | 173568     | 99.93      |        |          |              | 15 | 396.00 | 13376      | 7.70       |        |          |              |
| 4  | 335.95 | 27378      | 15.76      |        |          |              | 16 | 397.10 | 3016       | 1.74       |        |          |              |
| 5  | 336.95 | 2157       | 1.24       |        |          |              | 17 | 398.00 | 10077      | 5.80       |        |          |              |
| 6  | 354.90 | 17385      | 10.01      |        |          |              | 18 | 399.00 | 2911       | 1.68       |        |          |              |
| 7  | 356.85 | 18810      | 10.83      |        |          |              | 19 | 401.10 | 8086       | 4.66       |        |          |              |
| 8  | 357.80 | 2597       | 1.50       |        |          |              | 20 | 688.55 | 3016       | 1.74       |        |          |              |
| 9  | 371.00 | 4242       | 2.44       |        |          |              | 21 | 689.25 | 2631       | 1.51       |        |          |              |
| 10 | 372.90 | 4308       | 2.48       |        |          |              | 22 | 689.65 | 2181       | 1.26       |        |          |              |
| 11 | 374.00 | 5319       | 3.06       |        |          |              | 23 | 691.25 | 2155       | 1.24       |        |          |              |
| 12 | 374.95 | 1857       | 1.07       |        |          |              |    |        |            |            |        |          |              |

Figure S98. LCMS spectrum of compound **32** (NPD-2971).



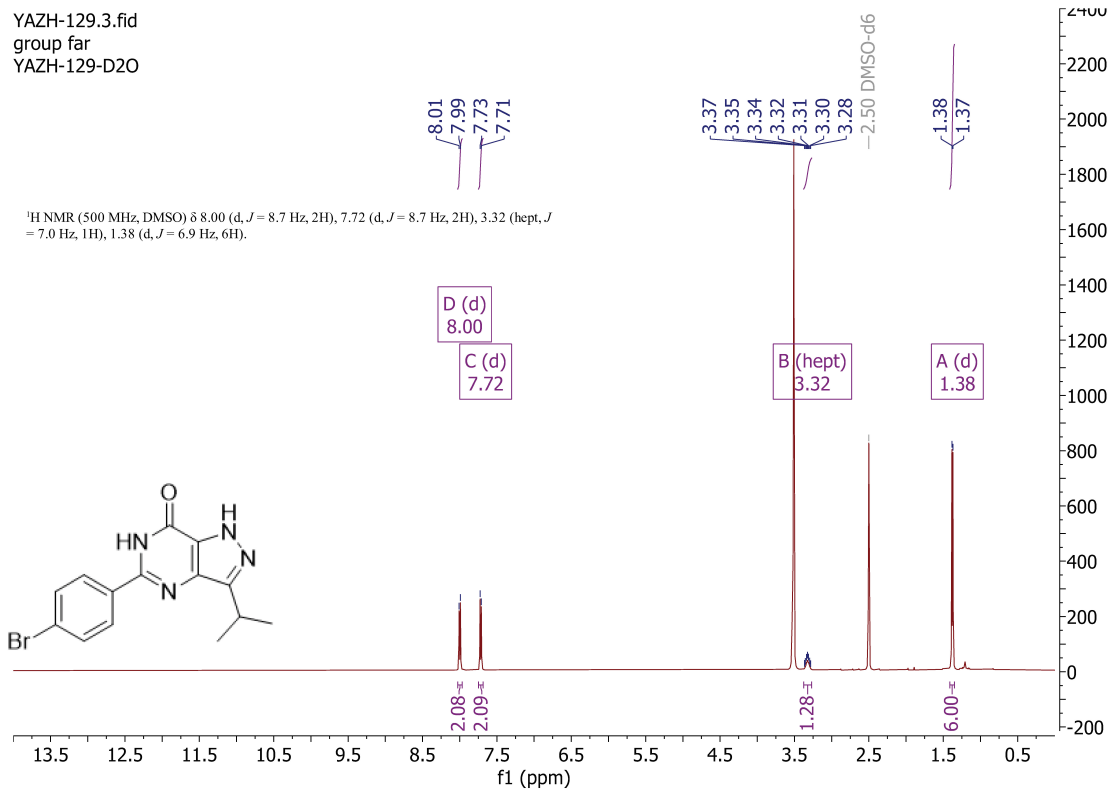

Figure S99. <sup>1</sup>H NMR spectrum of compound **32** (NPD-2971).

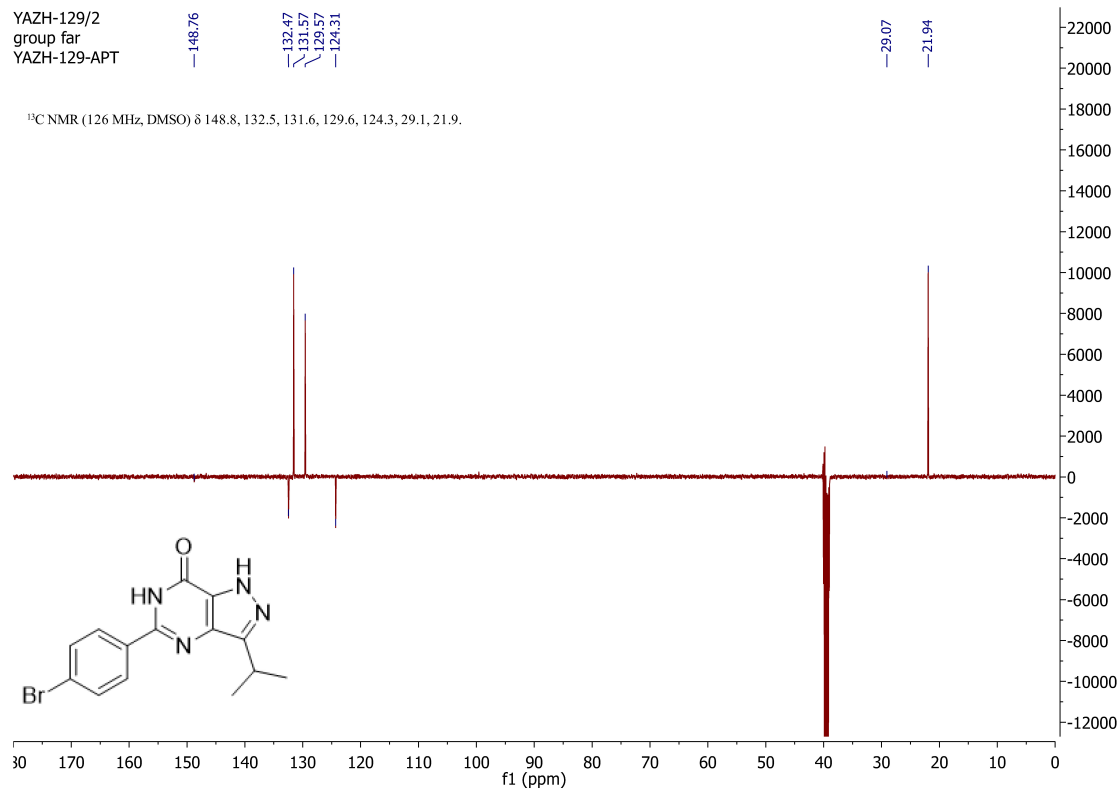

Figure S100. <sup>13</sup>C NMR spectrum of compound **32** (NPD-2971).

Acquired by : Admin  
 Date Acquired : 5/13/2016 6:47:19 PM  
 Sample Name : YAZH-130  
 Sample ID :  
 Tray# : 1  
 Vial# : 32  
 Injection Volume : 1  
 Data File : C:\LabSolutions\Data\2016 - wk19\YAZH-130.lcd  
 Background File : blanco 13052016.lcd  
 Method File : Method SCAN ACID standard.lcm  
 Report Format : DefaultL.CMS.lcr  
 Tuning File : C:\LabSolutions\Tuning\Tuning-ESI-pos-neg01072015a.lct  
 Processed by : Admin  
 Modified Date : 5/17/2016 9:03:32 AM

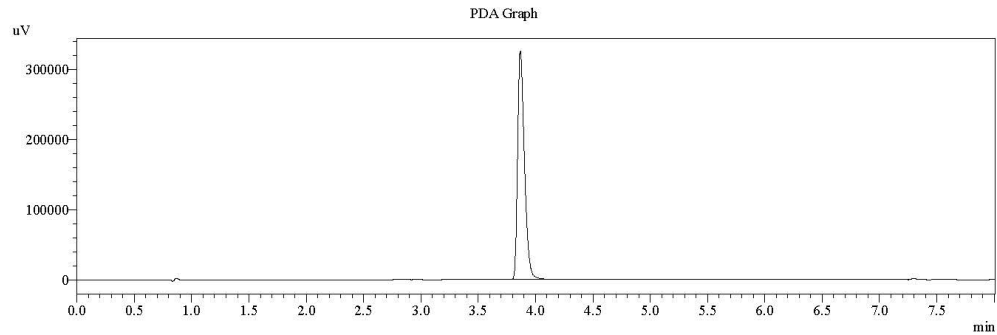

PDA Ch1 254nm 4nm

| Peak# | Name | Ret. Time | Area    | Area%   |
|-------|------|-----------|---------|---------|
| 1     |      | 3.862     | 1345092 | 100.000 |

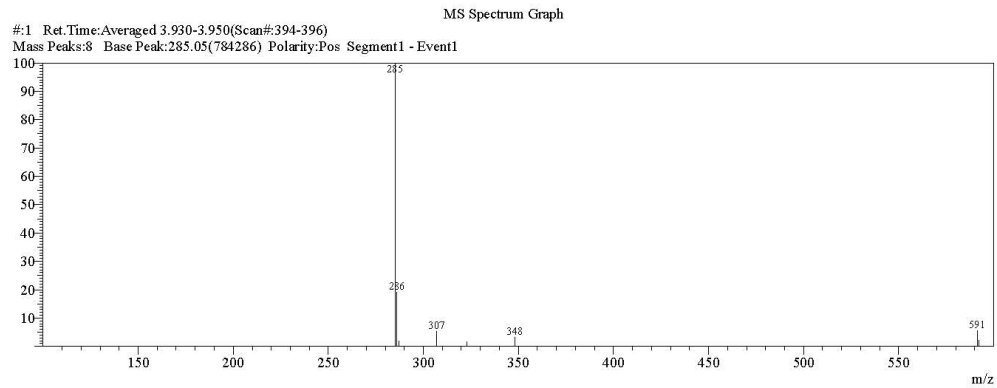

MS Spectrum Table

#1 Ret.Time:  
 BG Mode:Calc 3.820<->4.170(383<->418)  
 Mass Peaks:8 Base Peak:285.05(784286) Polarity:Pos Segment1 - Event1

| # | m/z    | Abs.Inten. | Rel.Inten. | Charge | Polarity | Monoisotopic | # | m/z    | Abs.Inten. | Rel.Inten. | Charge | Polarity | Monoisotopic |
|---|--------|------------|------------|--------|----------|--------------|---|--------|------------|------------|--------|----------|--------------|
| 1 | 285.05 | 784286     | 100.00     |        |          |              | 5 | 323.05 | 13171      | 1.68       |        |          |              |
| 2 | 286.05 | 149498     | 19.06      |        |          |              | 6 | 348.10 | 25832      | 3.29       |        |          |              |
| 3 | 287.10 | 15769      | 2.01       |        |          |              | 7 | 591.25 | 43781      | 5.58       |        |          |              |
| 4 | 306.95 | 41061      | 5.24       |        |          |              | 8 | 592.20 | 17656      | 2.25       |        |          |              |

Figure S101. LCMS spectrum of compound **33** (NPD-2972).

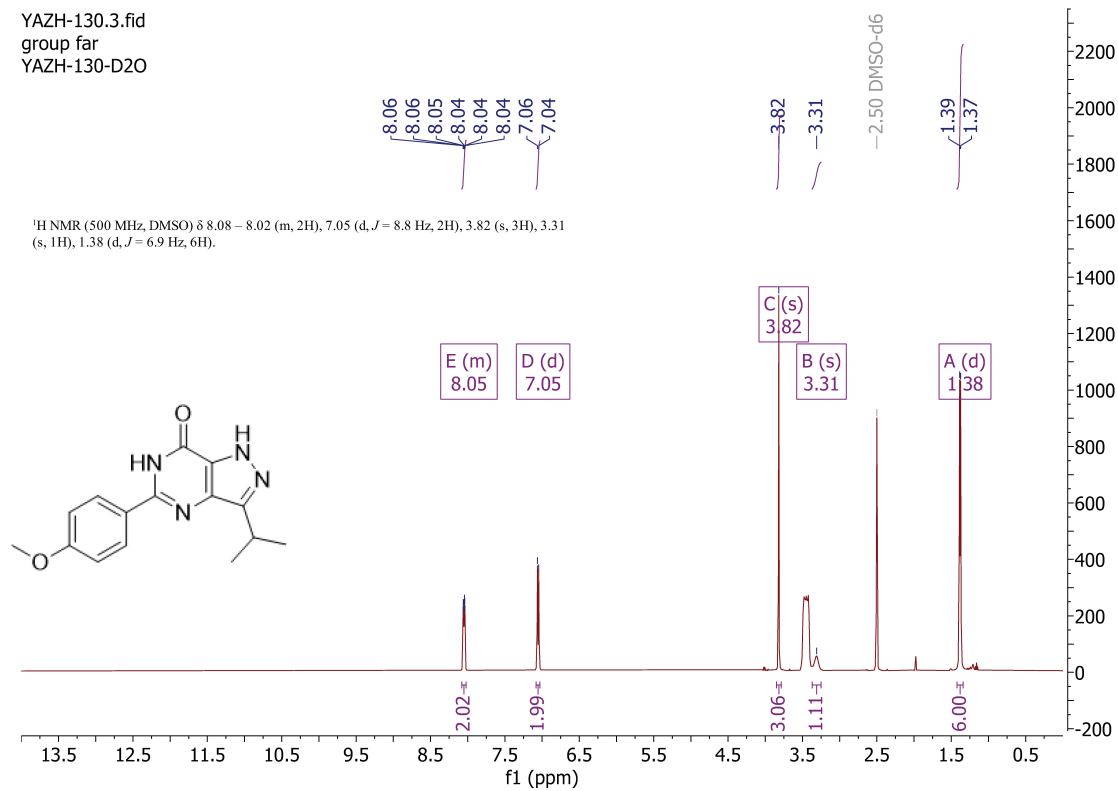

Figure S102. <sup>1</sup>H NMR spectrum of compound **33** (NPD-2972).

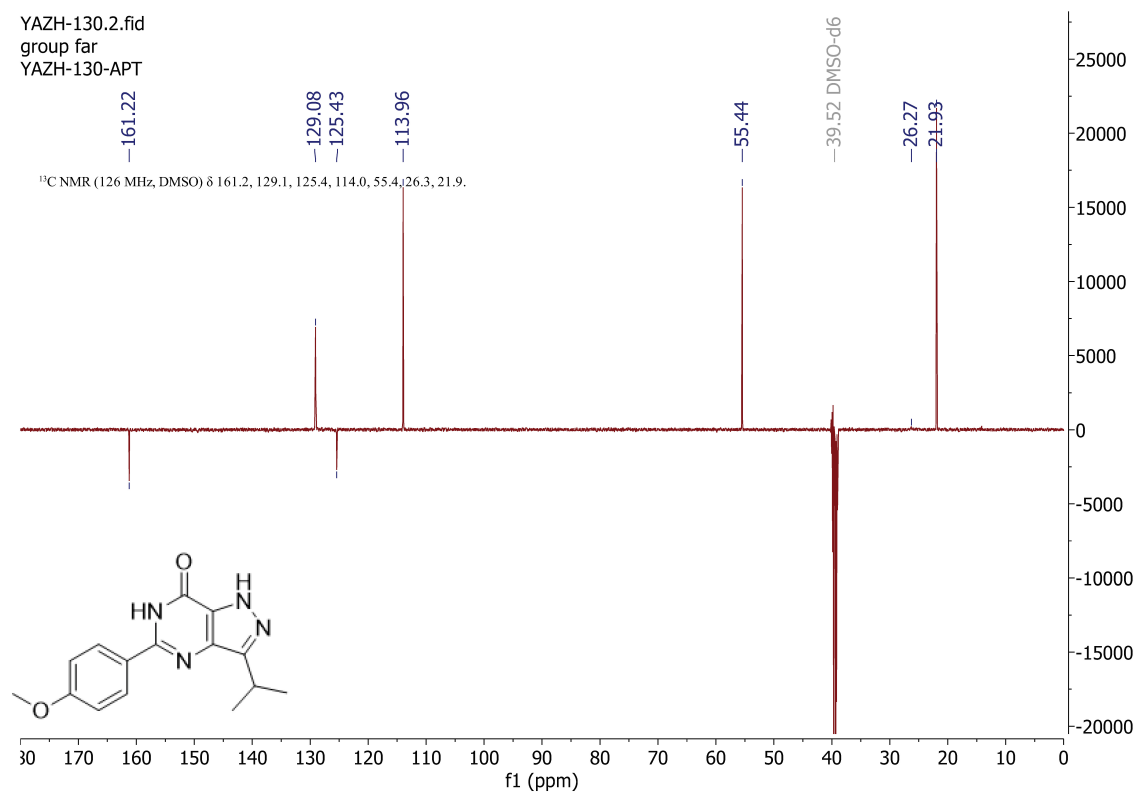

Figure S103. <sup>13</sup>C NMR spectrum of compound **33** (NPD-2972).

Acquired by : Admin  
 Date Acquired : 25/4/2018 1:58:14 PM  
 Sample Name : YAZH01-201  
 Sample ID :  
 Tray# : 1  
 Vial# : 21  
 Injection Volume : 3  
 Data File : C:\LabSolutions\Data\2018\2018-wk17\YAZH01-201.lcd  
 Background File : blanco\_25042018.lcd  
 Method File : Method\_SCAN\_ACID\_standard.lcm  
 Report Format : DefaultLCMS.lcr  
 Tuning File : C:\LabSolutions\Tuning\Tuning-ESI-pos-neg01072015a.lct  
 Processed by : Admin  
 Modified Date : 25/4/2018 2:09:39 PM

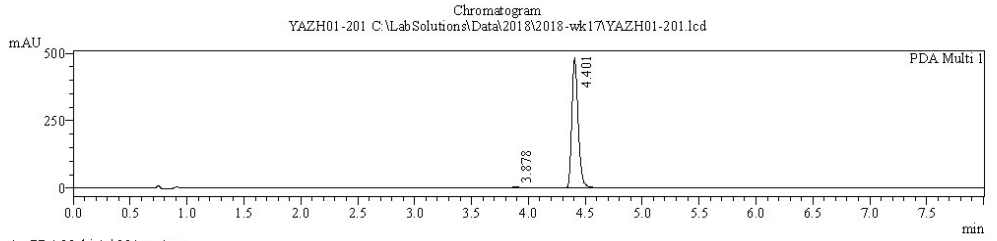

PeakTable

| Peak# | Name | Ret. Time | Area    | Area%  |
|-------|------|-----------|---------|--------|
| 1     |      | 3.878     | 13465   | 0.726  |
| 2     |      | 4.401     | 1840199 | 99.274 |

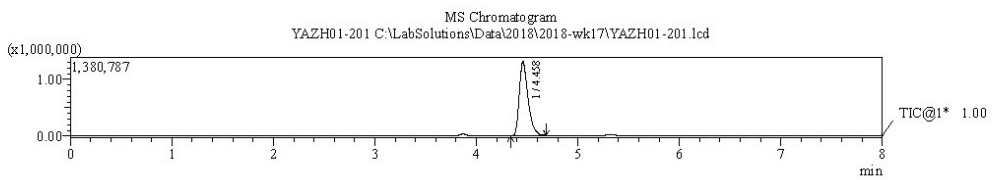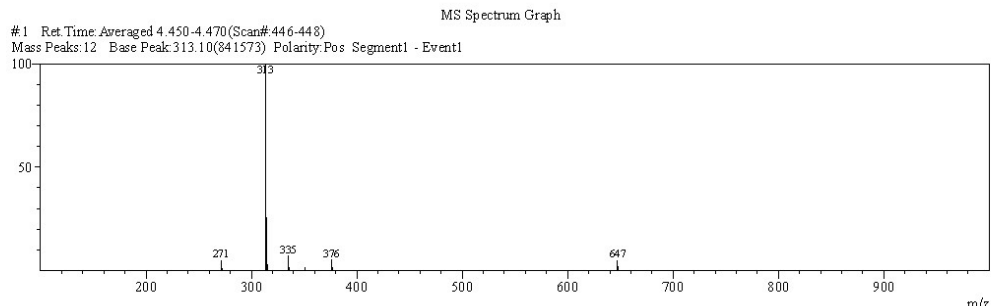

MS Spectrum Table

| # | m/z    | Abs.Inten. | Rel.Inten. | Charge | Polarity | Monoisotopic | #  | m/z    | Abs.Inten. | Rel.Inten. | Charge | Polarity | Monoisotopic |
|---|--------|------------|------------|--------|----------|--------------|----|--------|------------|------------|--------|----------|--------------|
| 1 | 271.05 | 40866      | 4.86       |        |          |              | 7  | 336.10 | 10275      | 1.22       |        |          |              |
| 2 | 272.05 | 8661       | 1.03       |        |          |              | 8  | 351.10 | 11372      | 1.35       |        |          |              |
| 3 | 313.10 | 841573     | 100.00     |        |          |              | 9  | 376.10 | 42899      | 5.10       |        |          |              |
| 4 | 314.10 | 213170     | 25.33      |        |          |              | 10 | 377.15 | 12870      | 1.53       |        |          |              |
| 5 | 315.10 | 22508      | 2.67       |        |          |              | 11 | 647.25 | 40611      | 4.83       |        |          |              |
| 6 | 335.10 | 58339      | 6.93       |        |          |              | 12 | 648.35 | 13571      | 1.61       |        |          |              |

Figure S104. LCMS spectrum of compound 34 (NPD-3377).

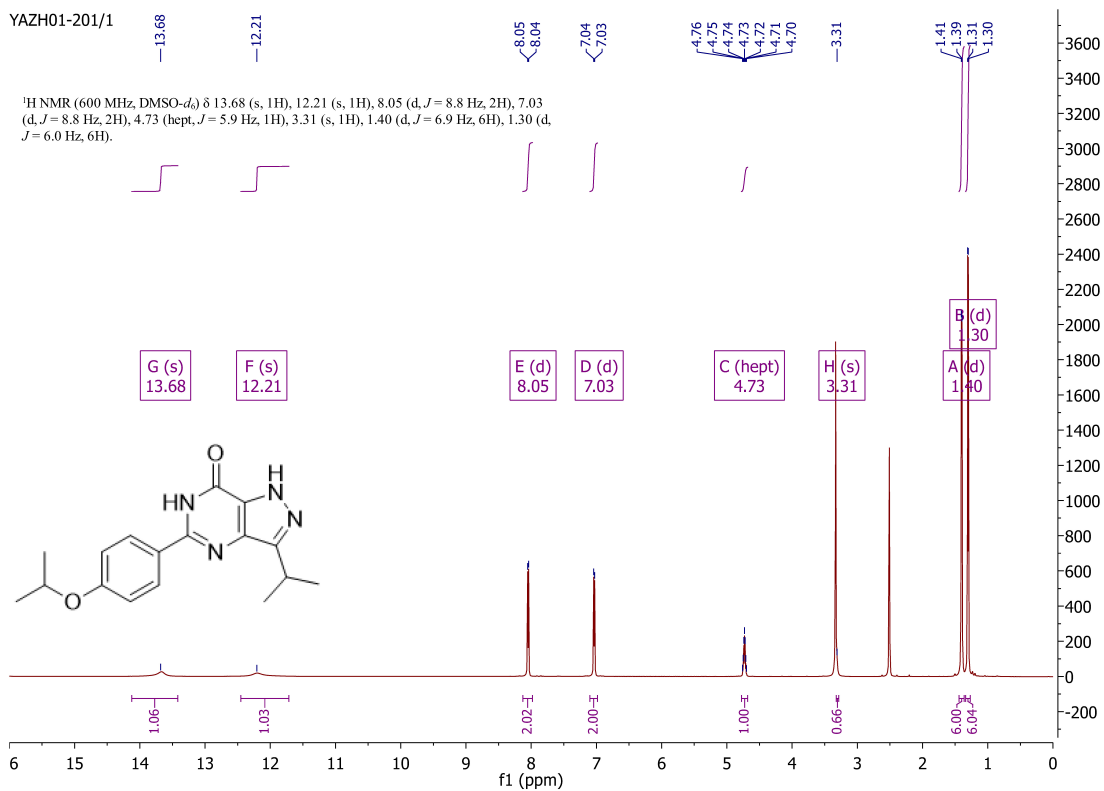

Figure S105. <sup>1</sup>H NMR spectrum of compound **34** (NPD-3377).

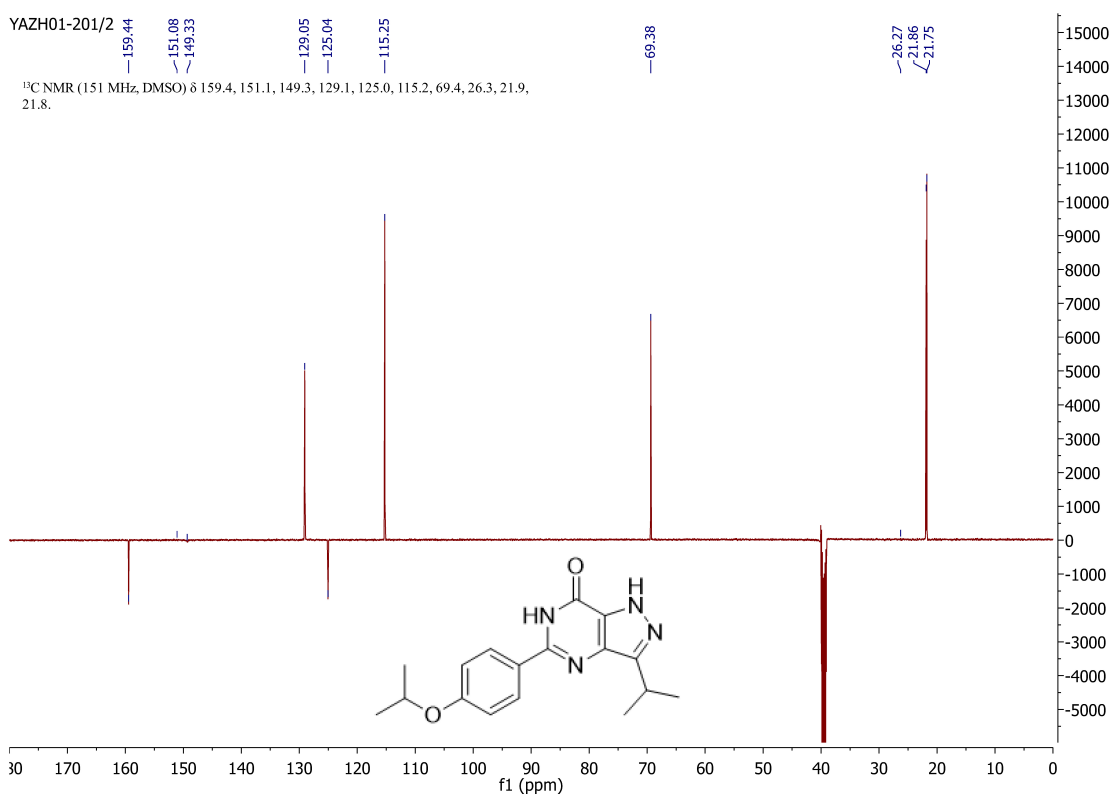

Figure S106. <sup>13</sup>C NMR spectrum of compound **34** (NPD-3377).

Acquired by : Admin  
 Date Acquired : 7/27/2017 3:00:12 PM  
 Sample Name : YAZH01-117  
 Sample ID :  
 Tray# : 1  
 Vial# : 46  
 Injection Volume : 10  
 Data File : C:\LabSolutions\Data\2017\2017-wk30\YAZH01-117.lcd  
 Background File : blanco 27072017.lcd  
 Method File : Method SCAN ACID standard.lcm  
 Report Format : DefaultL.CMS.lcr  
 Tuning File : C:\LabSolutions\Tuning\Tuning-ESI-pos-neg01072015a.lct  
 Processed by : Admin  
 Modified Date : 7/27/2017 3:39:01 PM

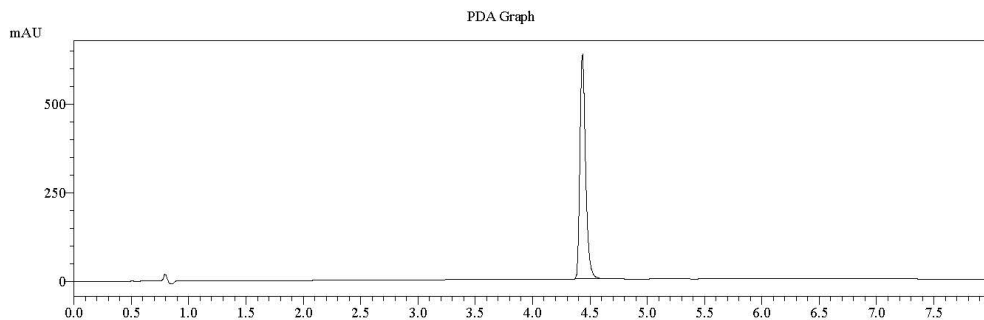

PDA Ch1 254nm 4nm

| Peak# | Name | Ret. Time | Area    | Area %  |
|-------|------|-----------|---------|---------|
| 1     |      | 4.429     | 2182152 | 100.000 |

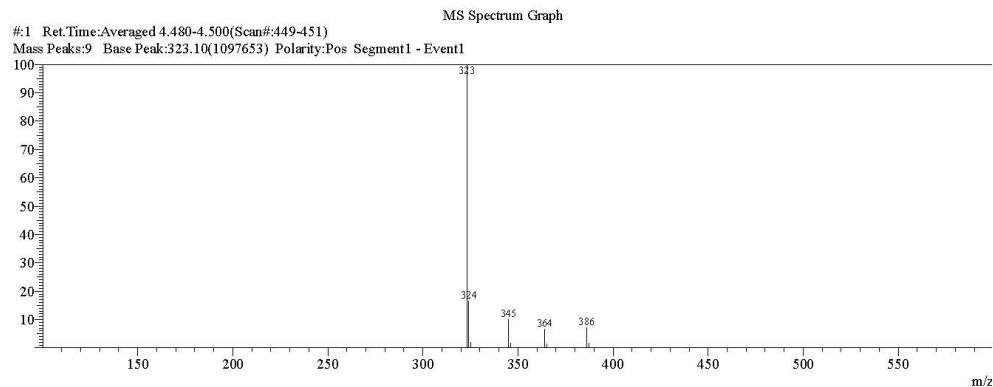

MS Spectrum Table

#1 Ret.Time:  
 BG Mode:Calc 4.380<->4.740(439<->475)  
 Mass Peaks:9 Base Peak:323.10(1097653) Polarity:Pos Segment1 - Event1

| # | m/z    | Abs.Inten. | Rel.Inten. | Charge | Polarity | Monoisotopic | # | m/z    | Abs.Inten. | Rel.Inten. | Charge | Polarity | Monoisotopic |
|---|--------|------------|------------|--------|----------|--------------|---|--------|------------|------------|--------|----------|--------------|
| 1 | 323.10 | 1097653    | 100.00     |        |          |              | 6 | 364.15 | 71298      | 6.50       |        |          |              |
| 2 | 324.15 | 181687     | 16.55      |        |          |              | 7 | 365.10 | 15570      | 1.42       |        |          |              |
| 3 | 325.05 | 20889      | 1.90       |        |          |              | 8 | 386.15 | 79321      | 7.23       |        |          |              |
| 4 | 345.05 | 108884     | 9.92       |        |          |              | 9 | 387.15 | 18237      | 1.66       |        |          |              |
| 5 | 346.15 | 18658      | 1.70       |        |          |              |   |        |            |            |        |          |              |

Figure S107. LCMS spectrum of compound 35 (NPD-3201).

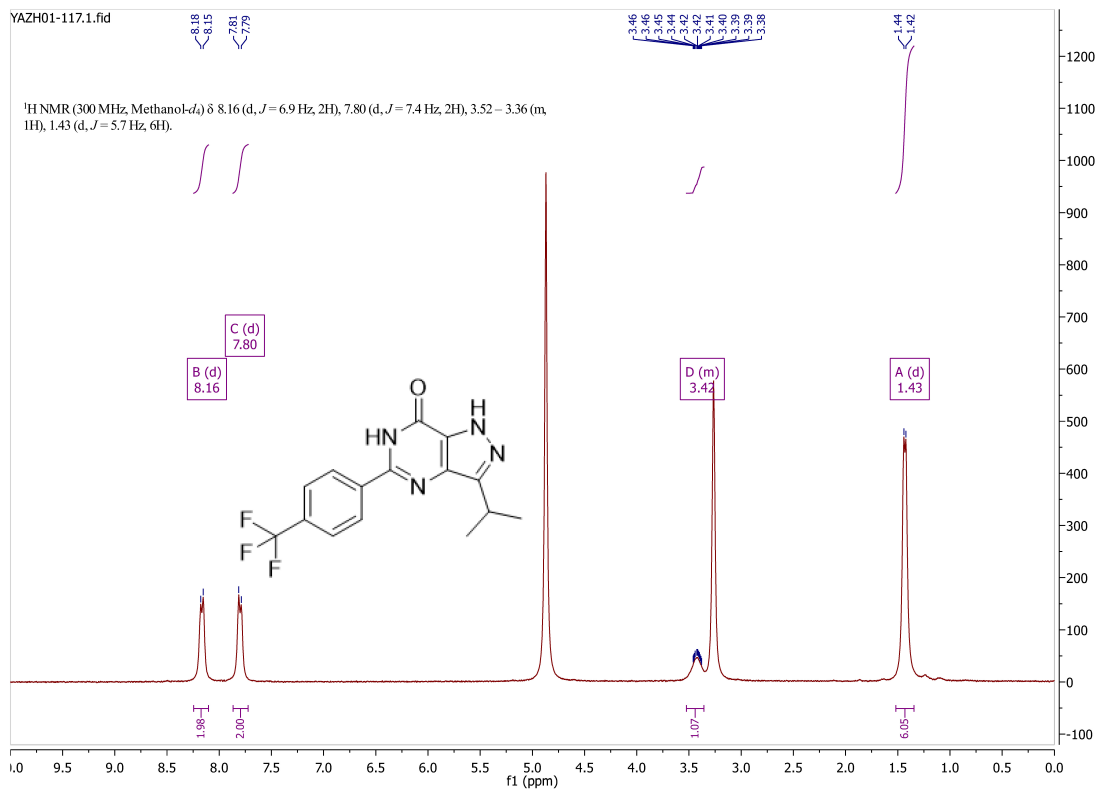

Figure S108. <sup>1</sup>H NMR spectrum of compound **35** (NPD-3201).

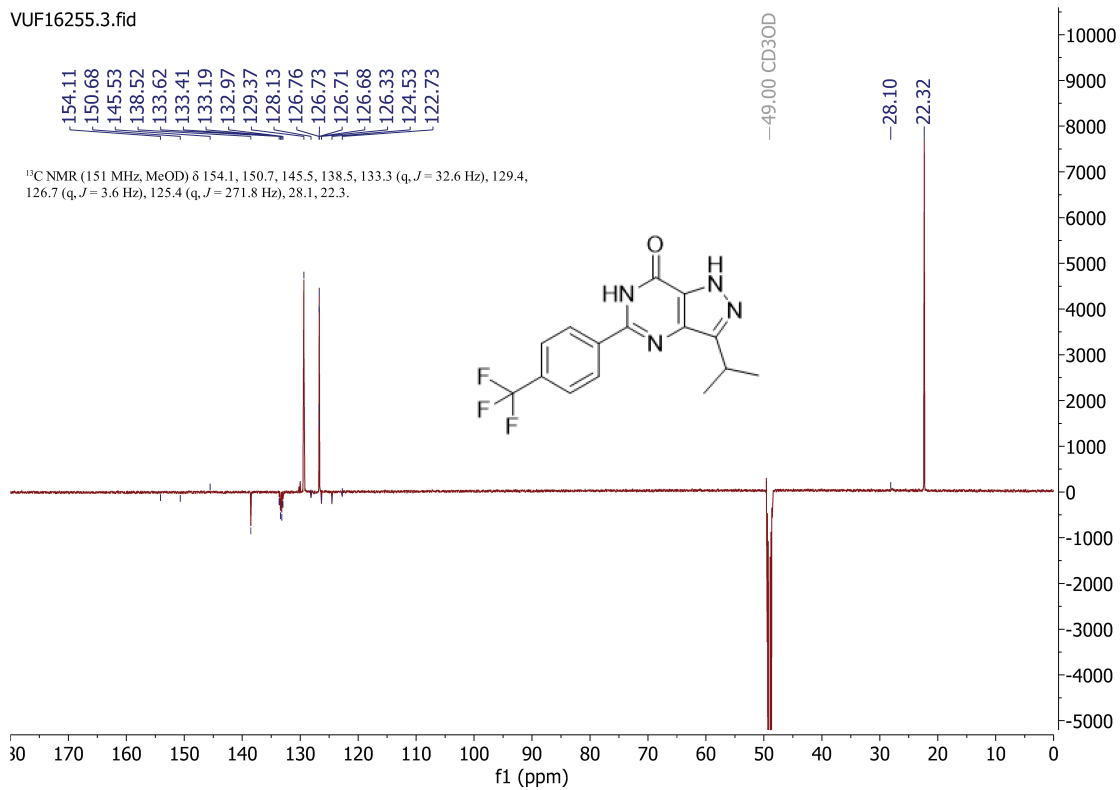

Figure S109. <sup>13</sup>C NMR spectrum of compound **35** (NPD-3201).

Acquired by : Admin  
 Date Acquired : 18/12/2018 4:08:05 PM  
 Sample Name : SHGI02PROD  
 Sample ID :  
 Tray# : 1  
 Vial# : 2  
 Injection Volume : 3  
 Data File : C:\LabSolutions\Data\2018\2018-wk51\SHGI02PROD.lcd  
 Background File : blanco 18122018.lcd  
 Method File : Method SCAN ACID standard.lcm  
 Report Format : DefaultLCMS.lcr  
 Tuning File : C:\LabSolutions\Tuning\Tuning-ESI-pos-neg01072015a.lct  
 Processed by : Admin  
 Modified Date : 18/12/2018 4:31:41 PM

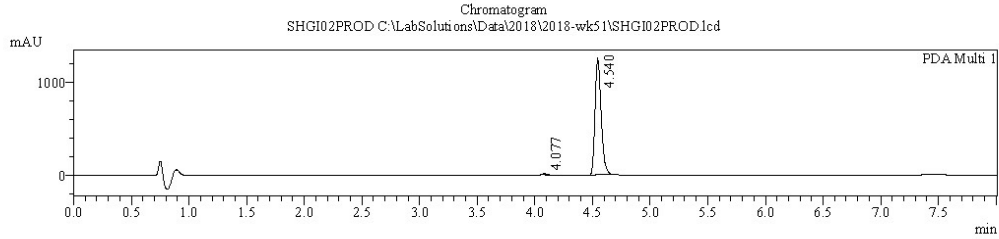

1 PDA Multi 1 / 230nm 4nm

PeakTabl

| Peak# | Name | Ret. Time | Area    | Area%  |
|-------|------|-----------|---------|--------|
| 1     |      | 4.077     | 30020   | 0.658  |
| 2     |      | 4.540     | 4534064 | 99.342 |

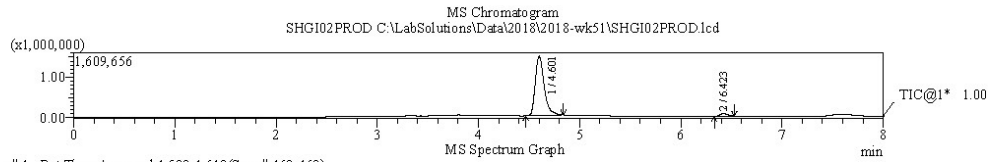

#1 Ret. Time: Averaged 4.590-4.610 (Scan# 460-462)  
Mass Peaks: 9 Base Peak: 339.05(1009719) Polarity: Pos Segment1 - Event1

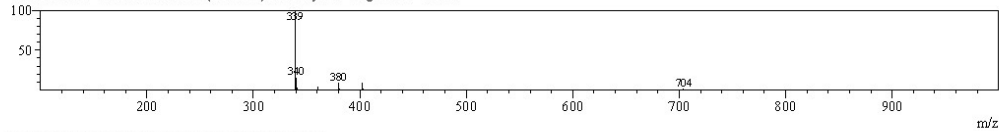

#2 Ret. Time: Averaged 6.410-6.430 (Scan# 642-644)  
Mass Peaks: 28 Base Peak: 420.35(27693) Polarity: Pos Segment1 - Event1

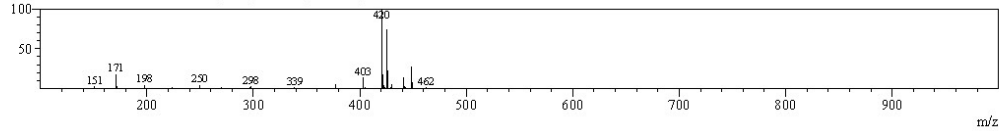

MS Spectrum Table

#1 Ret. Time:  
BG Mode Calc 4.470 <-> 4.840 (448 <-> 485)

| # | m/z    | Abs. Inten. | Rel. Inten. | Charge | Polarity | Monoisotopic | # | m/z    | Abs. Inten. | Rel. Inten. | Charge | Polarity | Monoisotopic |
|---|--------|-------------|-------------|--------|----------|--------------|---|--------|-------------|-------------|--------|----------|--------------|
| 1 | 339.05 | 1009719     | 100.00      |        |          |              | 4 | 361.05 | 44019       | 4.36        |        |          |              |
| 2 | 340.05 | 154089      | 15.26       |        |          |              | 5 | 380.10 | 89234       | 8.84        |        |          |              |
| 3 | 341.05 | 24179       | 2.39        |        |          |              | 6 | 381.10 | 17828       | 1.77        |        |          |              |

Figure S110. LCMS spectrum of compound 36 (NPD-3597).



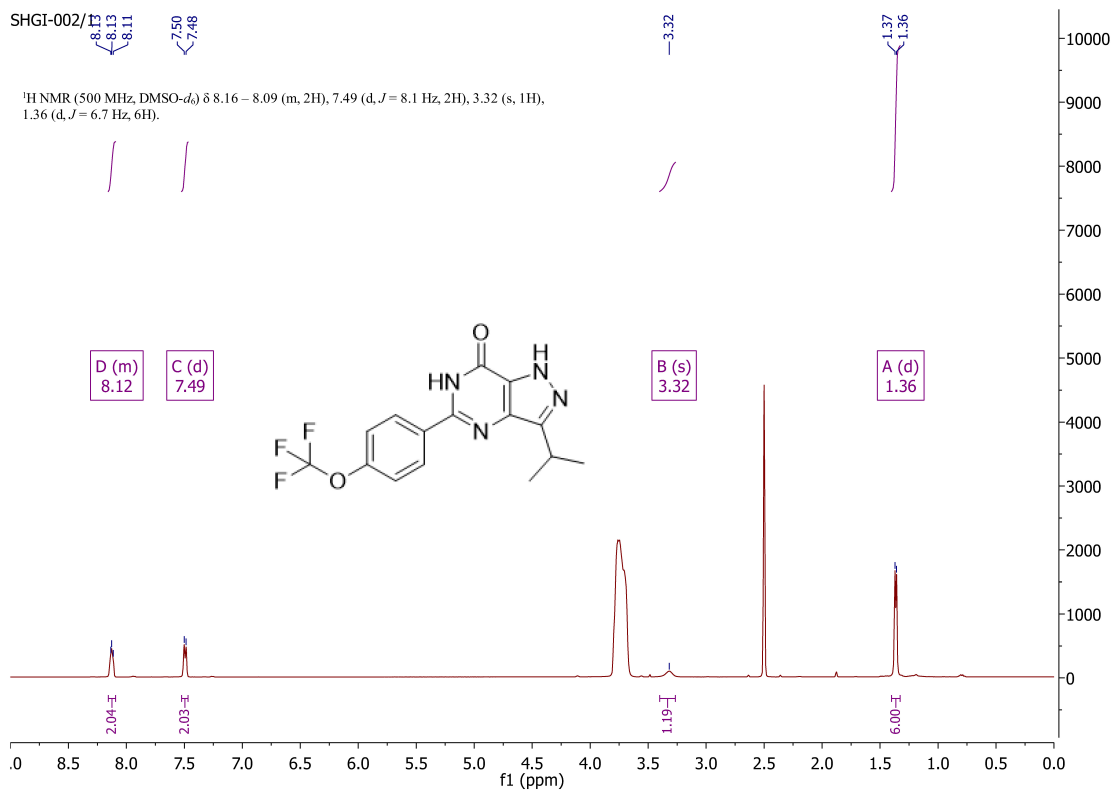

Figure S111.  $^1\text{H}$  NMR spectrum of compound **36** (NPD-3597).

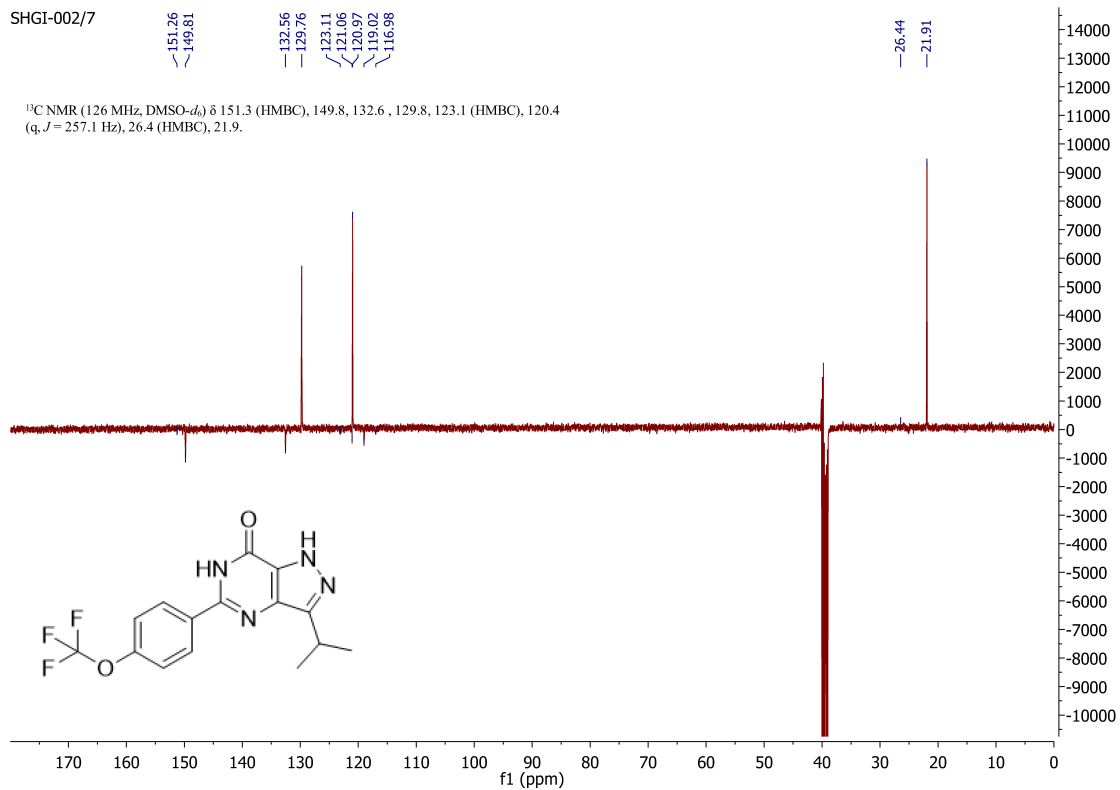

Figure S112.  $^{13}\text{C}$  NMR spectrum of compound **36** (NPD-3597).

Acquired by : Admin  
 Date Acquired : 7/27/2017 3:08:48 PM  
 Sample Name : YAZH01-119  
 Sample ID :  
 Tray# : 1  
 Vial# : 47  
 Injection Volume : 10  
 Data File : C:\LabSolutions\Data\2017\2017-wk30\YAZH01-119.lcd  
 Background File : blanco\_27072017.lcd  
 Method File : Method SCAN ACID standard.lcm  
 Report Format : DefaultL.CMS.lcr  
 Tuning File : C:\LabSolutions\Tuning\Tuning-ESI-pos-neg01072015a.lct  
 Processed by : Admin  
 Modified Date : 7/27/2017 3:39:58 PM

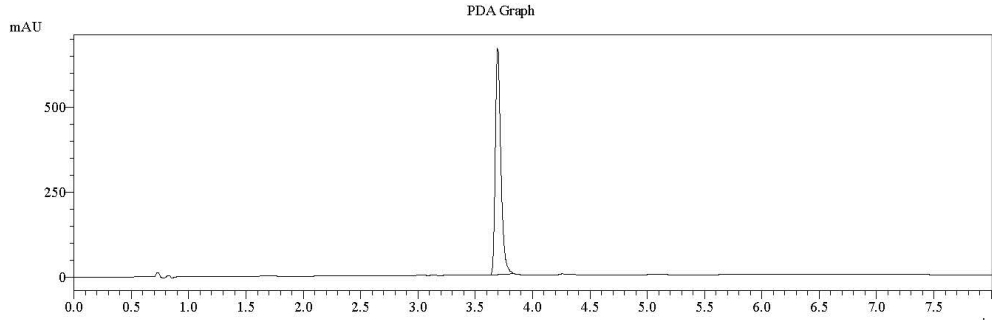

PDA Ch1 254nm 4nm

| Peak# | Name | Ret. Time | Area    | Area %  |
|-------|------|-----------|---------|---------|
| 1     |      | 3.690     | 2247543 | 100.000 |

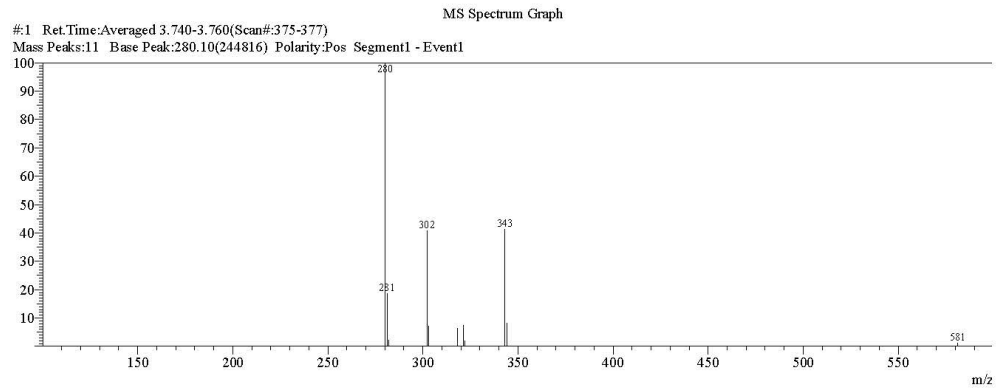

MS Spectrum Table

#1 Ret.Time:  
 BG Mode:Calc 3.640<->3.950(365<->396)  
 Mass Peaks:11 Base Peak:280.10(244816) Polarity:Pos Segment1 - Event1

| # | m/z    | Abs.Inten. | Rel.Inten. | Charge | Polarity | Monoisotopic | #  | m/z    | Abs.Inten. | Rel.Inten. | Charge | Polarity | Monoisotopic |
|---|--------|------------|------------|--------|----------|--------------|----|--------|------------|------------|--------|----------|--------------|
| 1 | 280.10 | 244816     | 100.00     |        |          |              | 7  | 321.15 | 17840      | 7.29       |        |          |              |
| 2 | 281.10 | 45449      | 18.56      |        |          |              | 8  | 322.15 | 4426       | 1.81       |        |          |              |
| 3 | 282.00 | 5095       | 2.08       |        |          |              | 9  | 343.15 | 100780     | 41.17      |        |          |              |
| 4 | 302.10 | 99961      | 40.83      |        |          |              | 10 | 344.10 | 20274      | 8.28       |        |          |              |
| 5 | 303.05 | 17719      | 7.24       |        |          |              | 11 | 581.25 | 3092       | 1.26       |        |          |              |
| 6 | 318.10 | 15304      | 6.25       |        |          |              |    |        |            |            |        |          |              |

Figure S113. LCMS spectrum of compound **37** (NPD-3203).

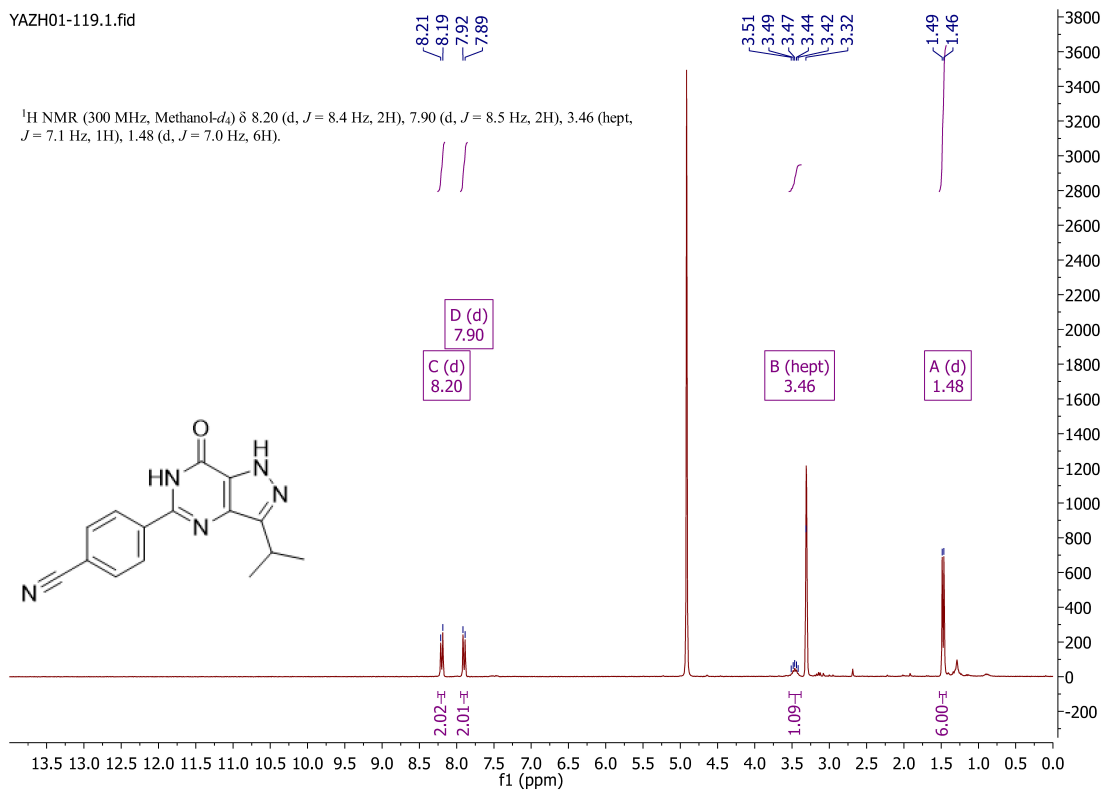

Figure S114. <sup>1</sup>H NMR spectrum of compound **37** (NPD-3203).

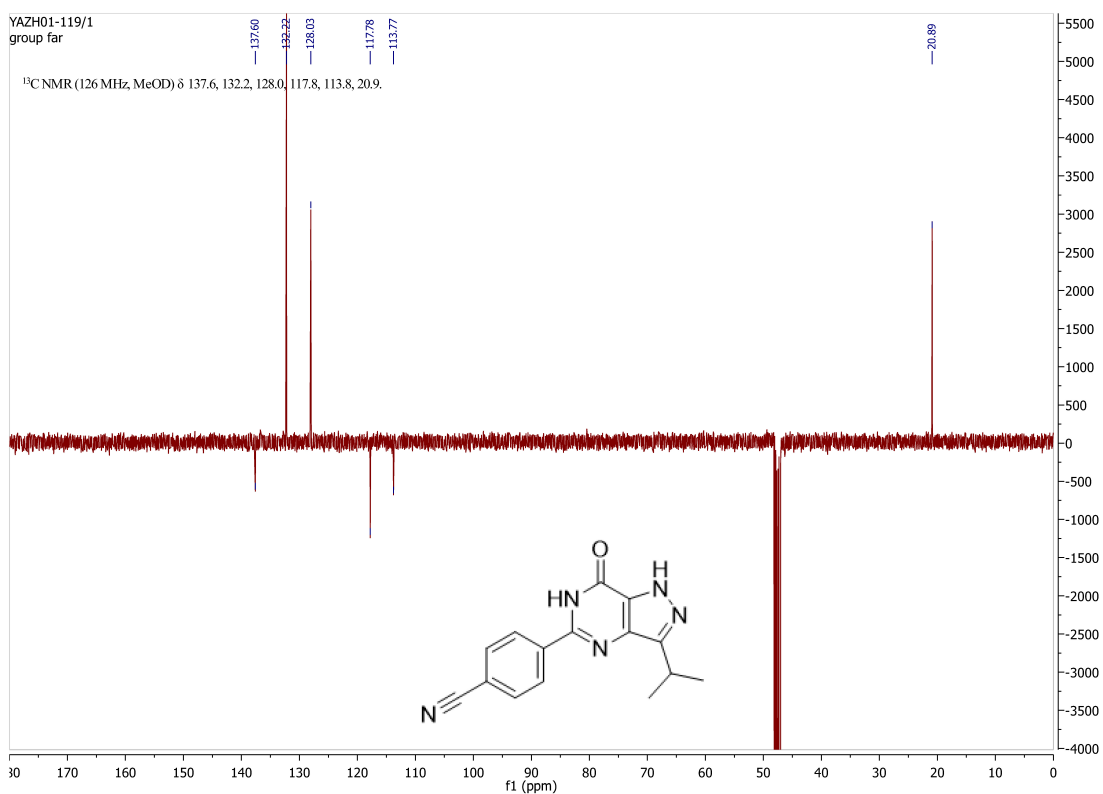

Figure S115. <sup>13</sup>C NMR spectrum of compound **37** (NPD-3203).

Acquired by : Admin  
 Date Acquired : 13/3/2018 3:55:15 PM  
 Sample Name : YAZH01-185  
 Sample ID :  
 Tray# : 1  
 Vial# : 17  
 Injection Volume : 3  
 Data File : C:\LabSolutions\Data\2018\2018-wk11\YAZH01-185.lcd  
 Background File : blanco\_130318.lcd  
 Method File : Method SCAN.ACID.standard.lcm  
 Report Format : DefaultLCMS.lcr  
 Tuning File : C:\LabSolutions\Tuning\Tuning-ESI-pos-neg01072015a1ct  
 Processed by : Admin  
 Modified Date : 10/12/2020 3:34:19 PM

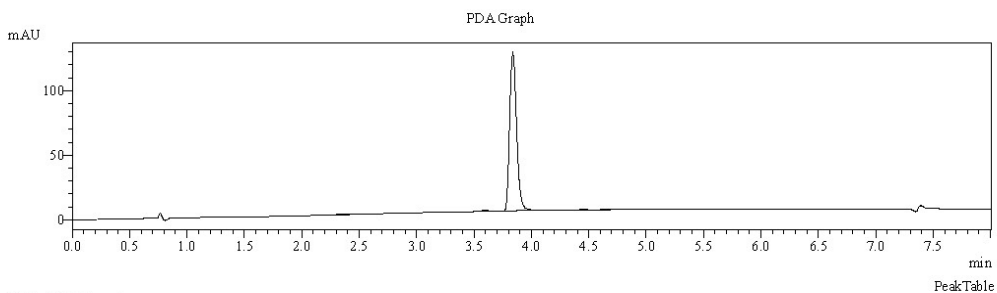

PDA Ch1 254nm 4nm

| Peak# | Name | Ret. Time | Area   | Area%  |
|-------|------|-----------|--------|--------|
| 1     |      | 2.336     | 2622   | 0.496  |
| 2     |      | 2.611     | 990    | 0.187  |
| 3     |      | 3.189     | 795    | 0.151  |
| 4     |      | 3.590     | 3610   | 0.683  |
| 5     |      | 3.833     | 510440 | 96.587 |
| 6     |      | 4.450     | 3120   | 0.590  |
| 7     |      | 4.662     | 4106   | 0.777  |
| 8     |      | 4.923     | 1563   | 0.296  |
| 9     |      | 5.150     | 1231   | 0.233  |

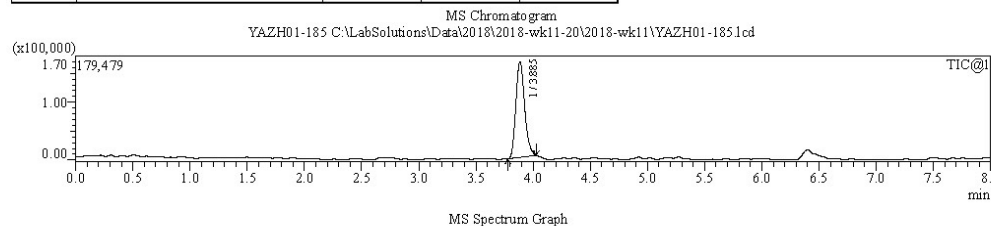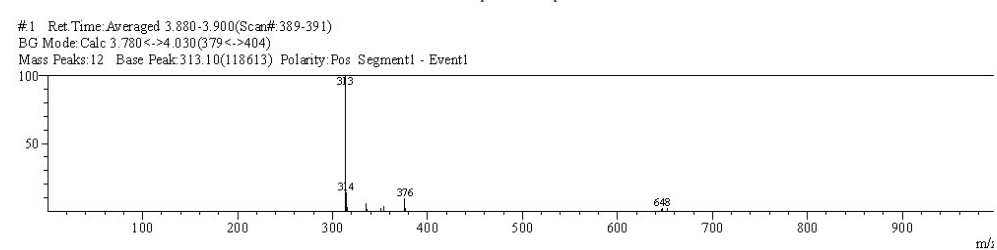

MS Spectrum Table

#1 Ret. Time:  
 BG Mode Calc 3.780<->4.030(379<->404)  
 Mass Peaks: 12 Base Peak: 313.10(118613) Polarity: Pos Segment1 - Event1

| # | m/z    | Abs.Inten. | Rel.Inten. | Charge | Polarity | Monoisotopic | #  | m/z    | Abs.Inten. | Rel.Inten. | Charge | Polarity | Monoisotopic |
|---|--------|------------|------------|--------|----------|--------------|----|--------|------------|------------|--------|----------|--------------|
| 1 | 313.10 | 118613     | 100.00     |        |          |              | 7  | 354.10 | 3980       | 3.36       |        |          |              |
| 2 | 314.10 | 16180      | 13.64      |        |          |              | 8  | 376.05 | 11130      | 9.38       |        |          |              |
| 3 | 315.20 | 3438       | 2.90       |        |          |              | 9  | 377.15 | 2090       | 1.76       |        |          |              |
| 4 | 335.10 | 6284       | 5.30       |        |          |              | 10 | 646.65 | 1534       | 1.29       |        |          |              |
| 5 | 336.15 | 1210       | 1.02       |        |          |              | 11 | 647.65 | 2013       | 1.70       |        |          |              |
| 6 | 351.05 | 2625       | 2.21       |        |          |              | 12 | 652.65 | 2544       | 2.14       |        |          |              |

Figure S116. LCMS spectrum of compound **38** (NPD-3305).

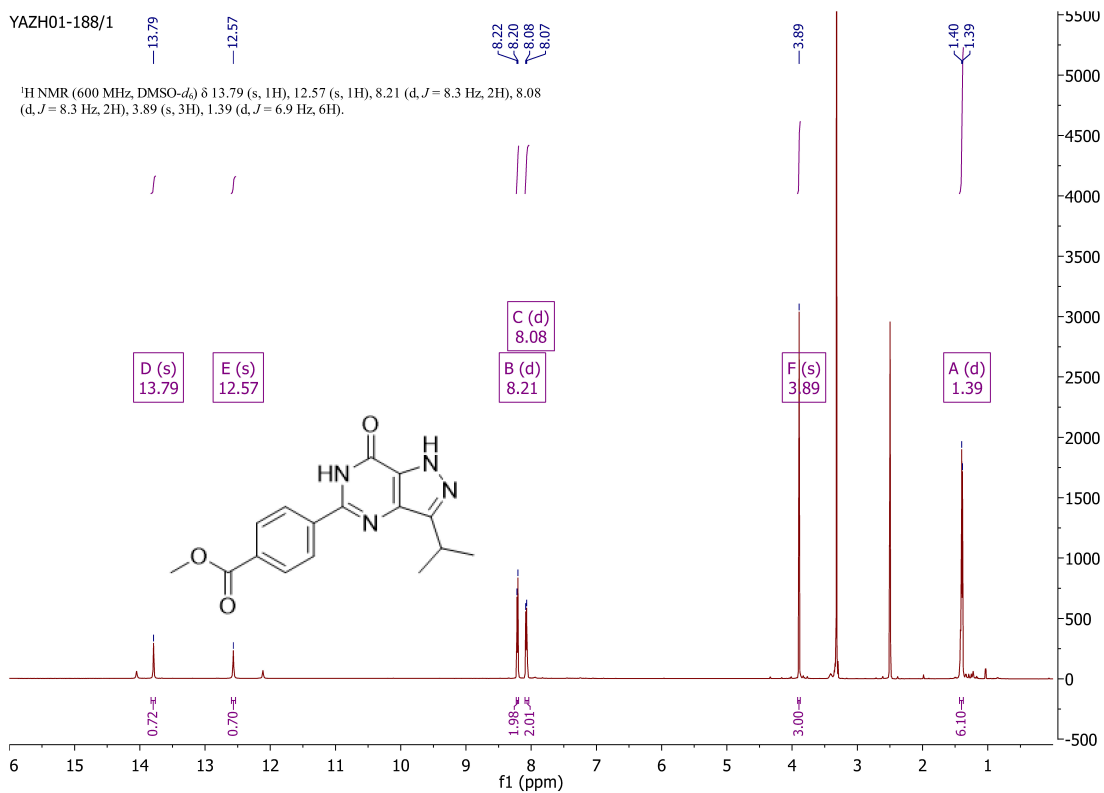

Figure S117. <sup>1</sup>H NMR spectrum of compound **38** (NPD-3305).

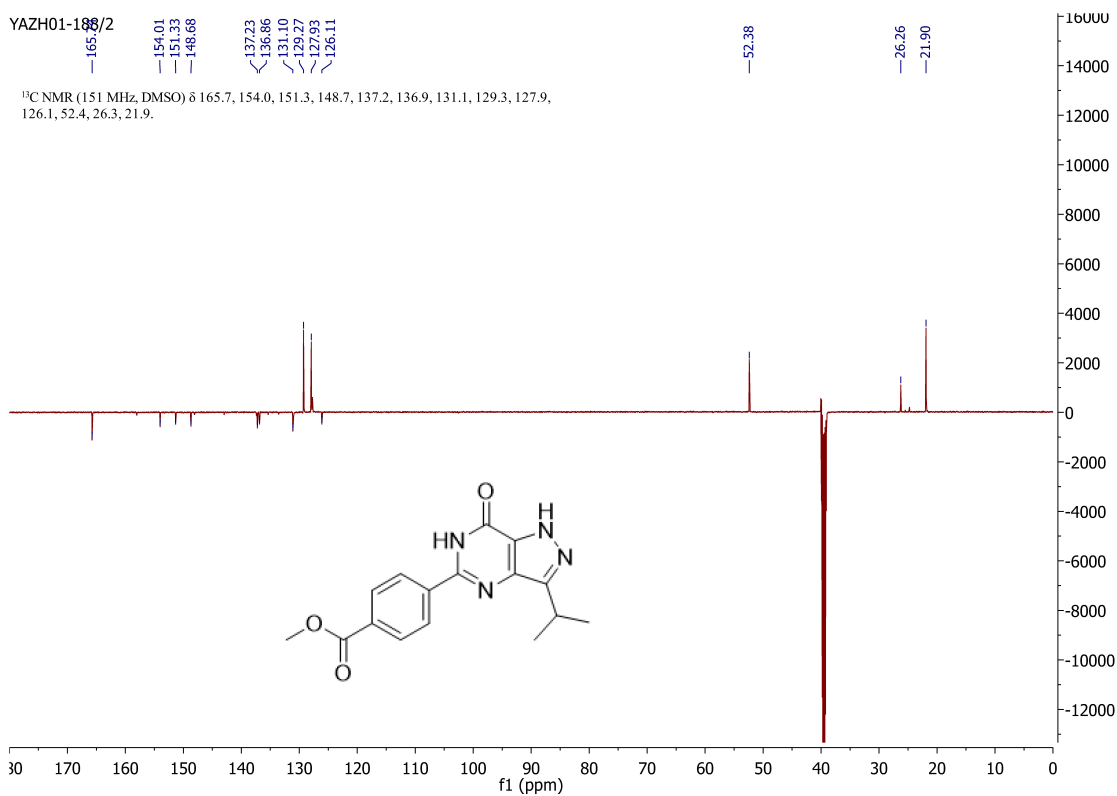

Figure S118. <sup>13</sup>C NMR spectrum of compound **38** (NPD-3305).

Acquired by : Admin  
 Date Acquired : 7/5/2018 1:38:34 PM  
 Sample Name : YAZH01-211  
 Sample ID :  
 Tray# : 1  
 Vial# : 26  
 Injection Volume : 3  
 Data File : C:\LabSolutions\Data\2018\2018-wk19\YAZH01-211.lcd  
 Background File : blanco\_070518.lcd  
 Method File : Method SCAN ACID standard.lcm  
 Report Format : DefaultL.CMS.lcr  
 Tuning File : C:\LabSolutions\Tuning\Tuning-ESI-pos-neg01072015a.lct  
 Processed by : Admin  
 Modified Date : 7/5/2018 1:56:05 PM

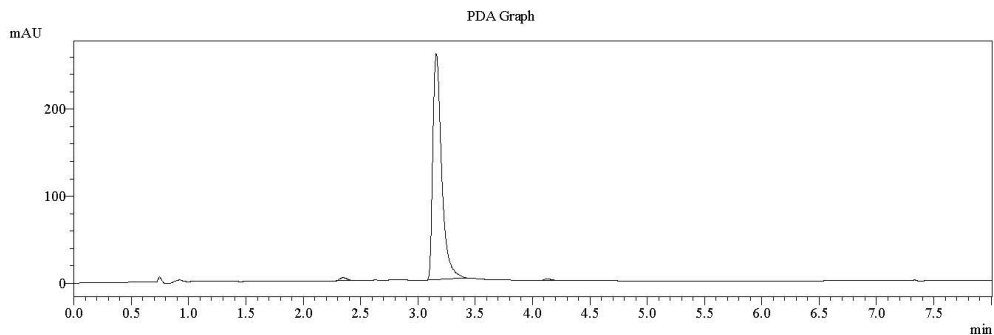

PDA Ch1 254nm 4nm

| Peak# | Name | Ret. Time | Area    | Area % |
|-------|------|-----------|---------|--------|
| 1     |      | 2.343     | 14270   | 1.014  |
| 2     |      | 3.156     | 1386801 | 98.514 |
| 3     |      | 4.125     | 6642    | 0.472  |

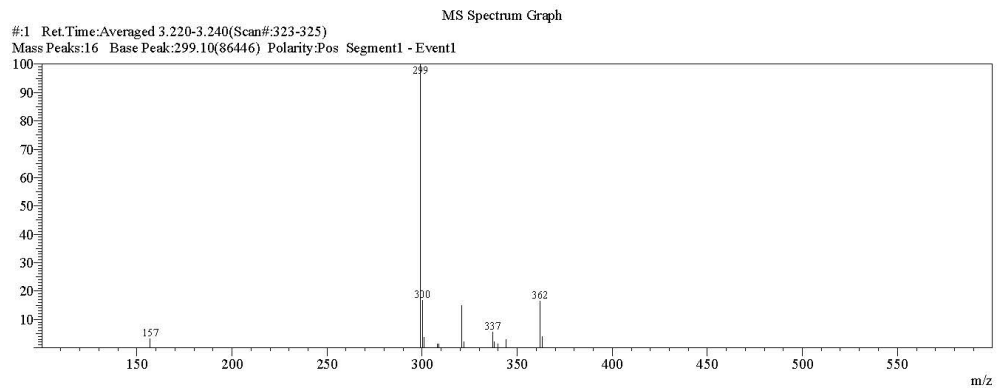

MS Spectrum Table

#1 Ret.Time:  
 BG Mode:Calc 3.110<=>3.470(312<=>348)  
 Mass Peaks:16 Base Peak:299.10(86446) Polarity:Pos Segment1 - Event1

| # | m/z    | Abs.Inten. | Rel.Inten. | Charge | Polarity | Monoisotopic | #  | m/z    | Abs.Inten. | Rel.Inten. | Charge | Polarity | Monoisotopic |
|---|--------|------------|------------|--------|----------|--------------|----|--------|------------|------------|--------|----------|--------------|
| 1 | 157.00 | 2652       | 3.07       |        |          |              | 9  | 337.00 | 4685       | 5.42       |        |          |              |
| 2 | 299.10 | 86446      | 100.00     |        |          |              | 10 | 338.00 | 1800       | 2.08       |        |          |              |
| 3 | 300.05 | 14497      | 16.77      |        |          |              | 11 | 340.00 | 1203       | 1.39       |        |          |              |
| 4 | 300.95 | 3158       | 3.65       |        |          |              | 12 | 344.00 | 2475       | 2.86       |        |          |              |
| 5 | 307.95 | 1193       | 1.38       |        |          |              | 13 | 362.05 | 14214      | 16.44      |        |          |              |
| 6 | 308.95 | 1150       | 1.33       |        |          |              | 14 | 363.15 | 3410       | 3.94       |        |          |              |
| 7 | 321.00 | 12799      | 14.81      |        |          |              | 15 | 619.10 | 5256       | 6.08       |        |          |              |
| 8 | 321.95 | 1861       | 2.15       |        |          |              | 16 | 619.65 | 2539       | 2.94       |        |          |              |

Figure S119. LCMS spectrum of compound **39** (NPD-3489).

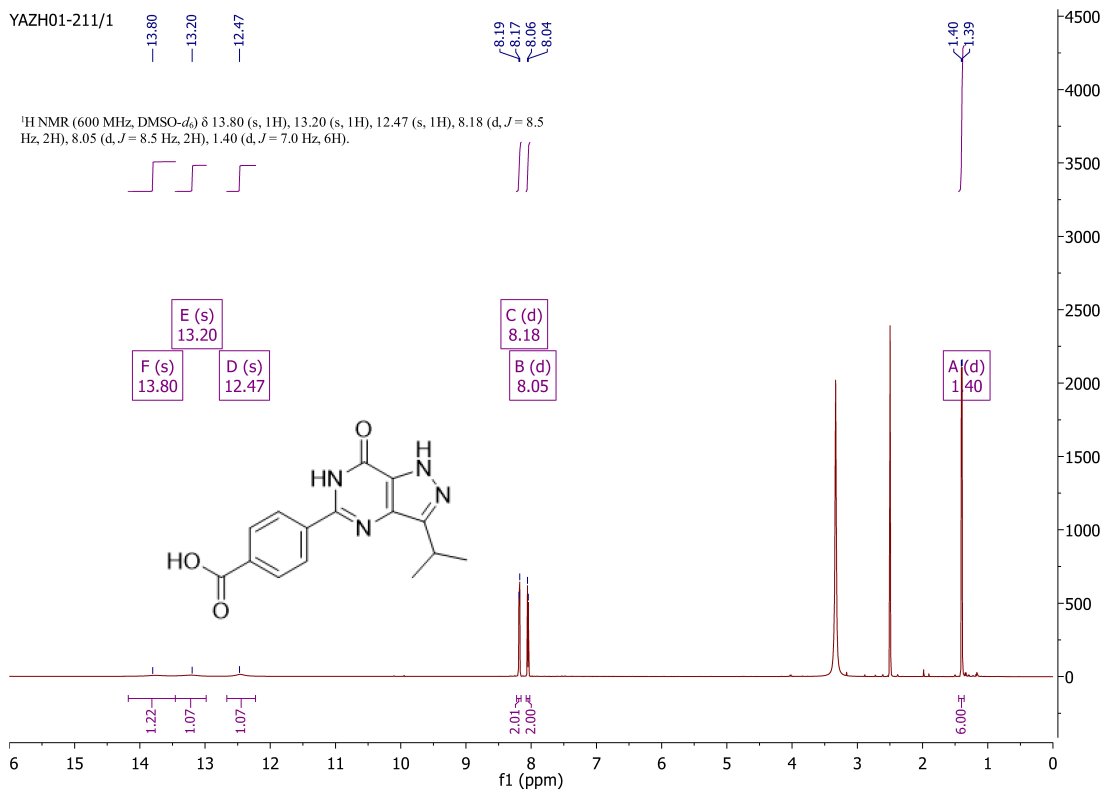

Figure S120.  $^1\text{H NMR}$  spectrum of compound **39** (NPD-3489).

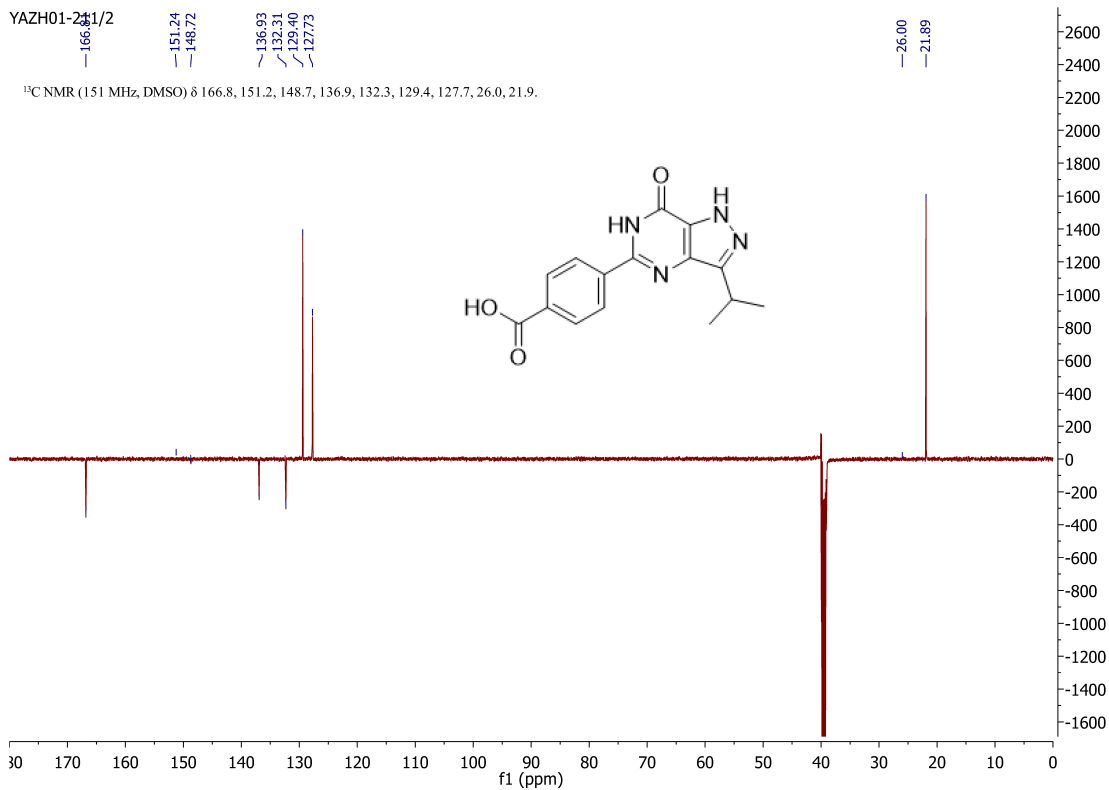

Figure S121.  $^{13}\text{C NMR}$  spectrum of compound **39** (NPD-3489).

Acquired by : Admin  
 Date Acquired : 22/3/2018 3:18:17 PM  
 Sample Name : YAZH01-190  
 Sample ID :  
 Tray# : 1  
 Vial# : 17  
 Injection Volume : 5  
 Data File : C:\LabSolutions\Data\2018\2018-wk12\YAZH01-190.lcd  
 Background File : blanco\_22032018.lcd  
 Method File : Method\_SCAN\_ACID\_standard.lcm  
 Report Format : DefaultLCMS.lcr  
 Tuning File : C:\LabSolutions\Tuning\Tuning-ESI-pos-neg01072015a.lct  
 Processed by : Admin  
 Modified Date : 22/3/2018 4:02:43 PM

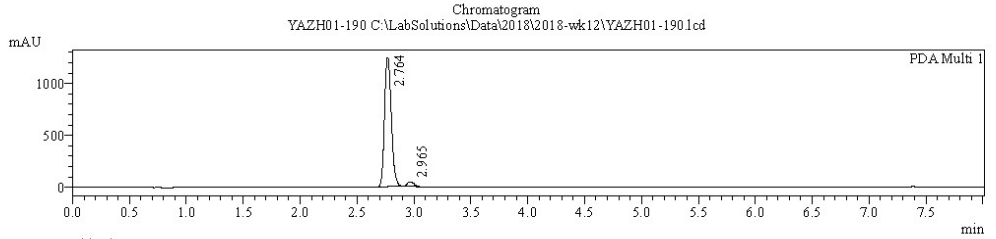

PeakTable

| Peak# | Name | Ret. Time | Area    | Area % |
|-------|------|-----------|---------|--------|
| 1     |      | 2.764     | 5168702 | 96.904 |
| 2     |      | 2.965     | 165149  | 3.096  |

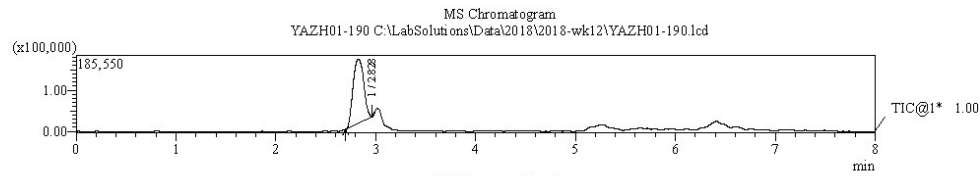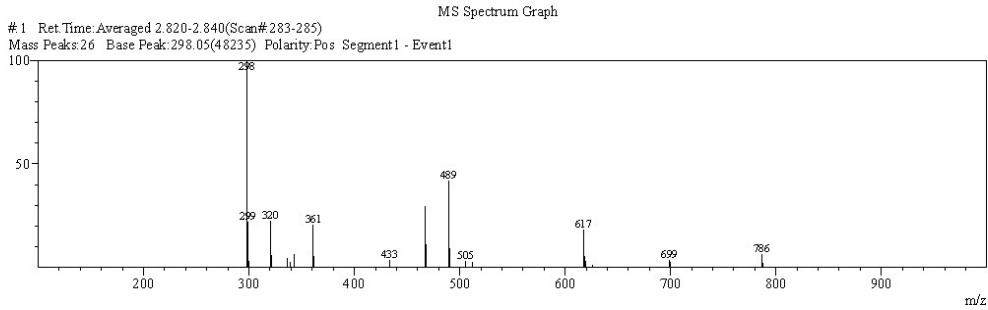

| # | m/z    | Abs.Inten. | Rel.Inten. | Charge | Polarity | Monoisotopic | #  | m/z    | Abs.Inten. | Rel.Inten. | Charge | Polarity | Monoisotopic |
|---|--------|------------|------------|--------|----------|--------------|----|--------|------------|------------|--------|----------|--------------|
| 1 | 298.05 | 48235      | 100.00     |        |          |              | 9  | 361.10 | 9883       | 20.49      |        |          |              |
| 2 | 299.15 | 10409      | 21.58      |        |          |              | 10 | 362.05 | 2614       | 5.42       |        |          |              |
| 3 | 300.00 | 1283       | 2.66       |        |          |              | 11 | 433.20 | 1585       | 3.29       |        |          |              |
| 4 | 320.05 | 10668      | 22.12      |        |          |              | 12 | 467.20 | 14196      | 29.43      |        |          |              |
| 5 | 321.10 | 2797       | 5.80       |        |          |              | 13 | 468.10 | 5260       | 10.90      |        |          |              |
| 6 | 336.10 | 1974       | 4.09       |        |          |              | 14 | 489.25 | 20085      | 41.64      |        |          |              |
| 7 | 339.05 | 1130       | 2.34       |        |          |              | 15 | 490.10 | 4324       | 8.96       |        |          |              |
| 8 | 343.05 | 3088       | 6.40       |        |          |              | 16 | 505.25 | 1348       | 2.79       |        |          |              |

Figure S122. LCMS spectrum of compound 40 (NPD-3371).



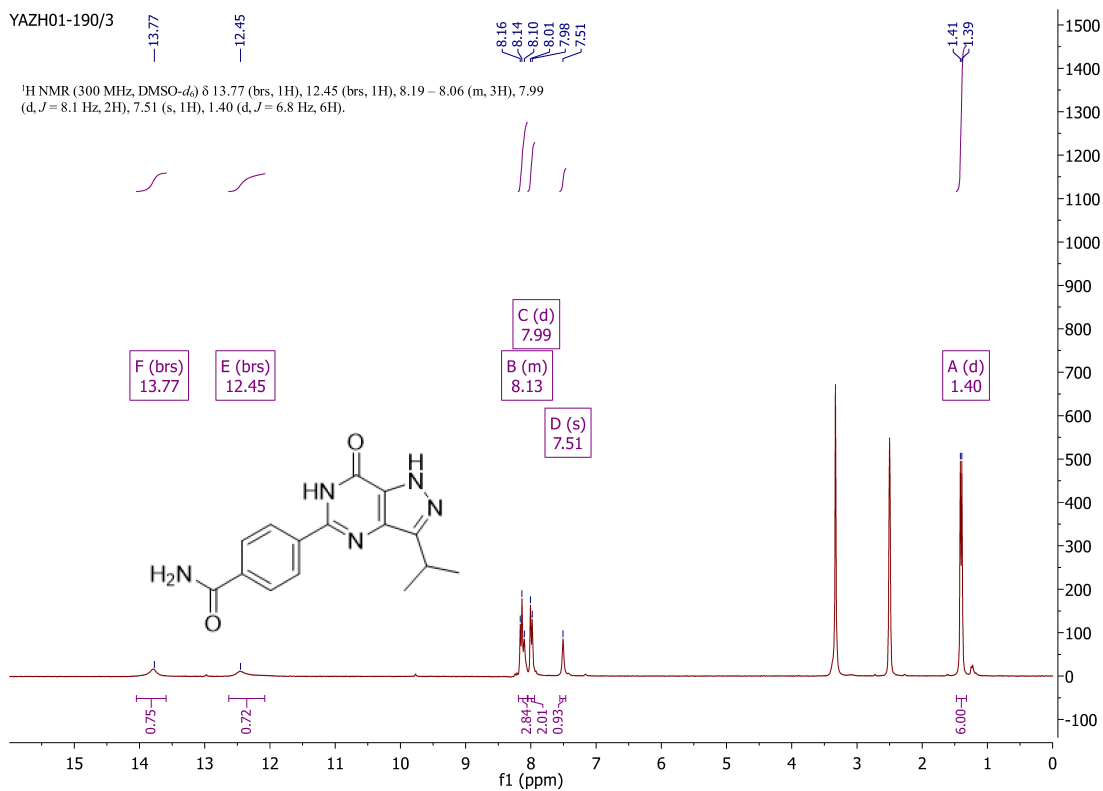

Figure S123.  $^1\text{H}$  NMR spectrum of compound **40** (NPD-3371).

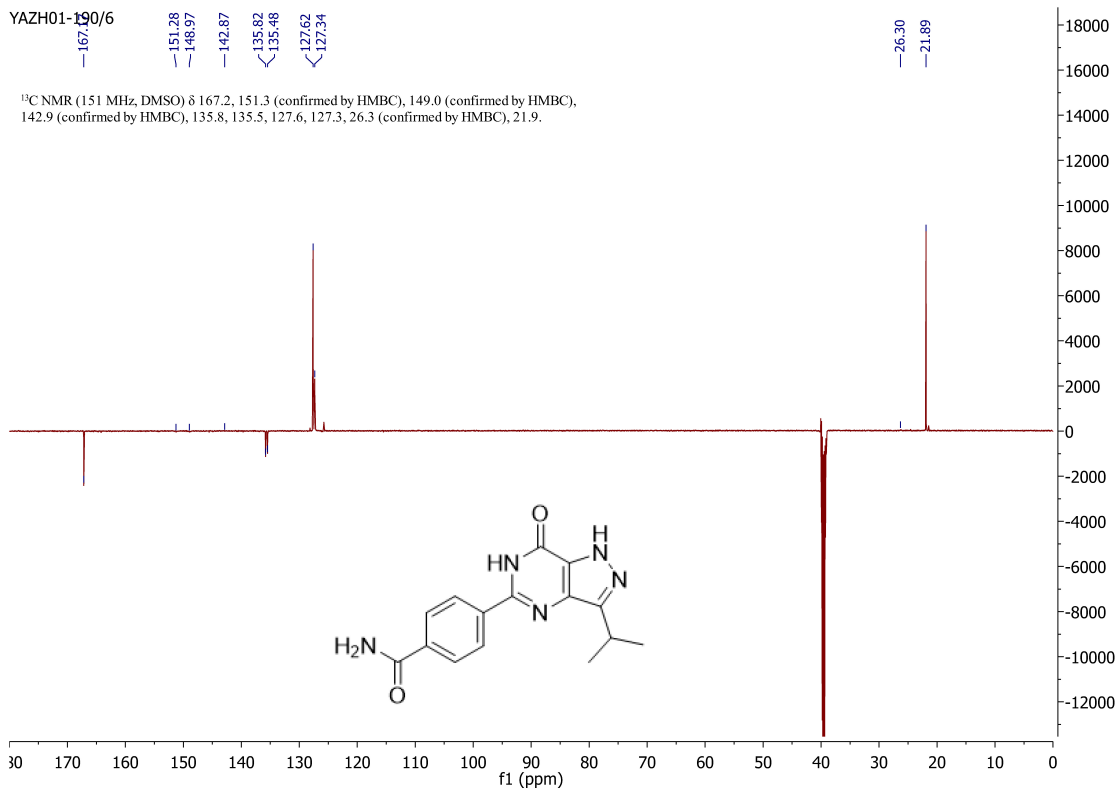

Figure S124.  $^{13}\text{C}$  NMR spectrum of compound **40** (NPD-3371).

Acquired by : Admin  
 Date Acquired : 2/28/2023 5:02:29 PM  
 Sample Name : VUF16558 YAZH01-199  
 Sample ID :  
 Tray# : 1  
 Vial# : 21  
 Injection Volume : 3  
 Data File : C:\LabSolutions\Data\2023\2023-wk09\VUF16558 YAZH01-199.lcd  
 Background File : blanco 28022023.lcd  
 Method File : Method SCAN ACID standard.lcm  
 Report Format : DefaultLCMS1cr  
 Tuning File : C:\LabSolutions\Tuning File\Tuning-ESI-pos-neg01072015.lct  
 Processed by : Admin  
 Modified Date : 2/28/2023 5:11:14 PM

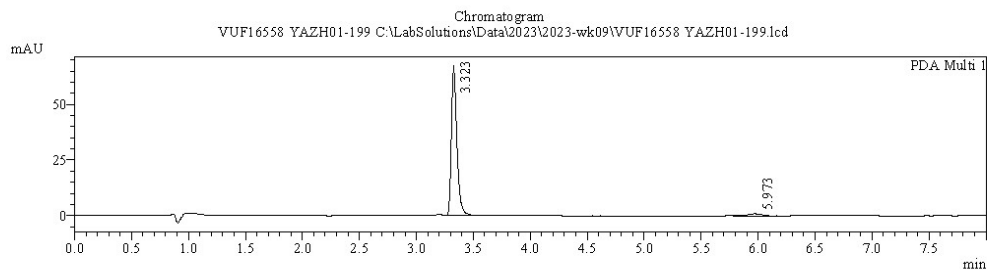

PeakTable

| Peak# | Ret. Time | Area   | Height | Name | Area%   |
|-------|-----------|--------|--------|------|---------|
| 1     | 3.323     | 221821 | 67257  |      | 96.808  |
| 2     | 5.973     | 7314   | 917    |      | 3.192   |
| Total |           | 229135 | 68174  |      | 100.000 |

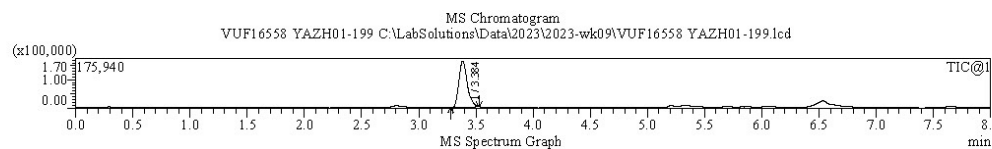

#1 Ret.Time: Averaged 3.370-3.390 (Scan# 338-340)  
 BG Mode: Calc 3.280<->3.530 (329<->354)  
 Mass Peaks: 12 Base Peak: 333.00 (115366) Polarity: Pos Segment1 - Event1

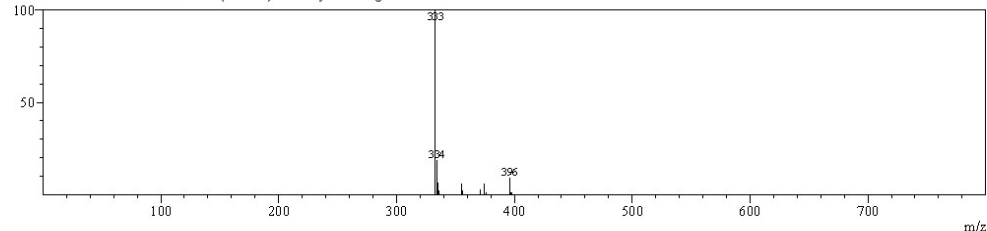

#1 Ret.Time:  
 BG Mode: Calc 3.280<->3.530 (329<->354)  
 Mass Peaks: 12 Base Peak: 333.00 (115366) Polarity: Pos Segment1 - Event

| # | m/z    | Abs.Inten. | Rel.Inten. | Charge | Polarity | Monoisotopic | #  | m/z    | Abs.Inten. | Rel.Inten. | Charge | Polarity | Monoisotopic |
|---|--------|------------|------------|--------|----------|--------------|----|--------|------------|------------|--------|----------|--------------|
| 1 | 333.00 | 115366     | 100.00     |        |          |              | 7  | 371.10 | 2885       | 2.50       |        |          |              |
| 2 | 334.05 | 21107      | 18.30      |        |          |              | 8  | 374.10 | 6548       | 5.68       |        |          |              |
| 3 | 335.00 | 7305       | 6.33       |        |          |              | 9  | 376.15 | 1274       | 1.10       |        |          |              |
| 4 | 336.00 | 2035       | 1.76       |        |          |              | 10 | 396.00 | 9968       | 8.64       |        |          |              |
| 5 | 355.05 | 6657       | 5.77       |        |          |              | 11 | 397.05 | 1283       | 1.11       |        |          |              |
| 6 | 356.20 | 2321       | 2.01       |        |          |              | 12 | 398.05 | 1174       | 1.02       |        |          |              |

Figure S125. LCMS spectrum of compound **41** (NPD-3376).

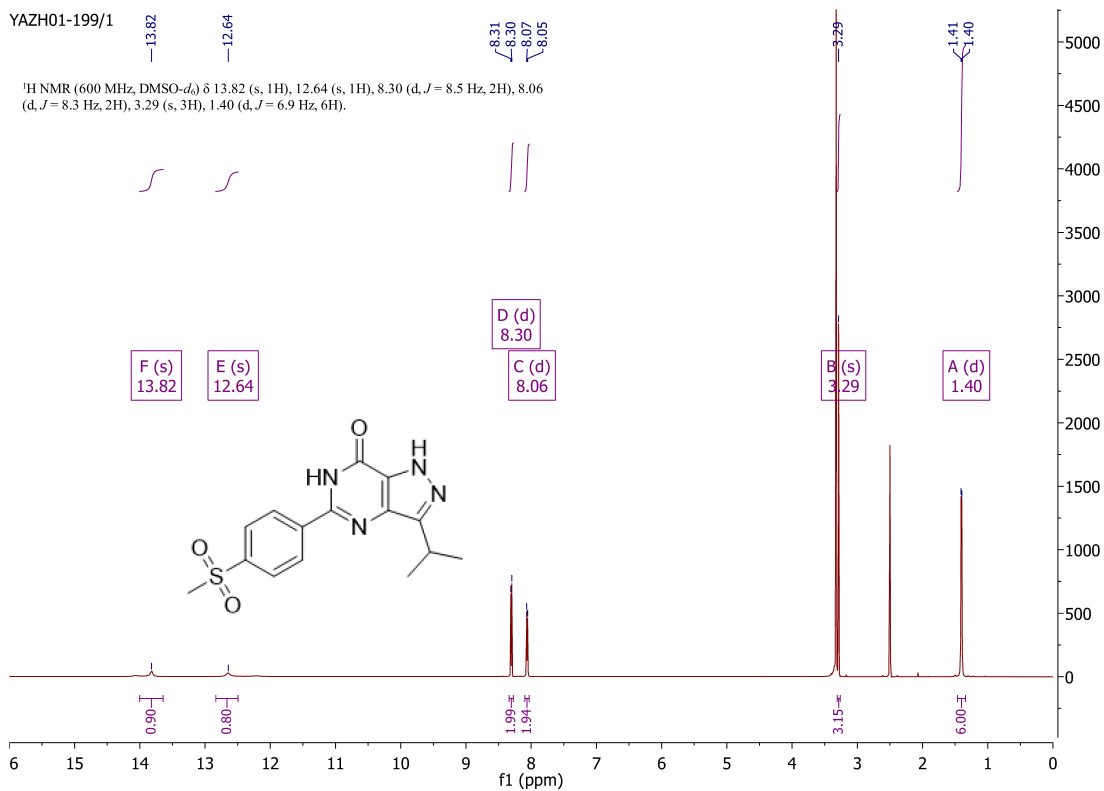

Figure S126.  $^1\text{H NMR}$  spectrum of compound **41** (NPD-3376).

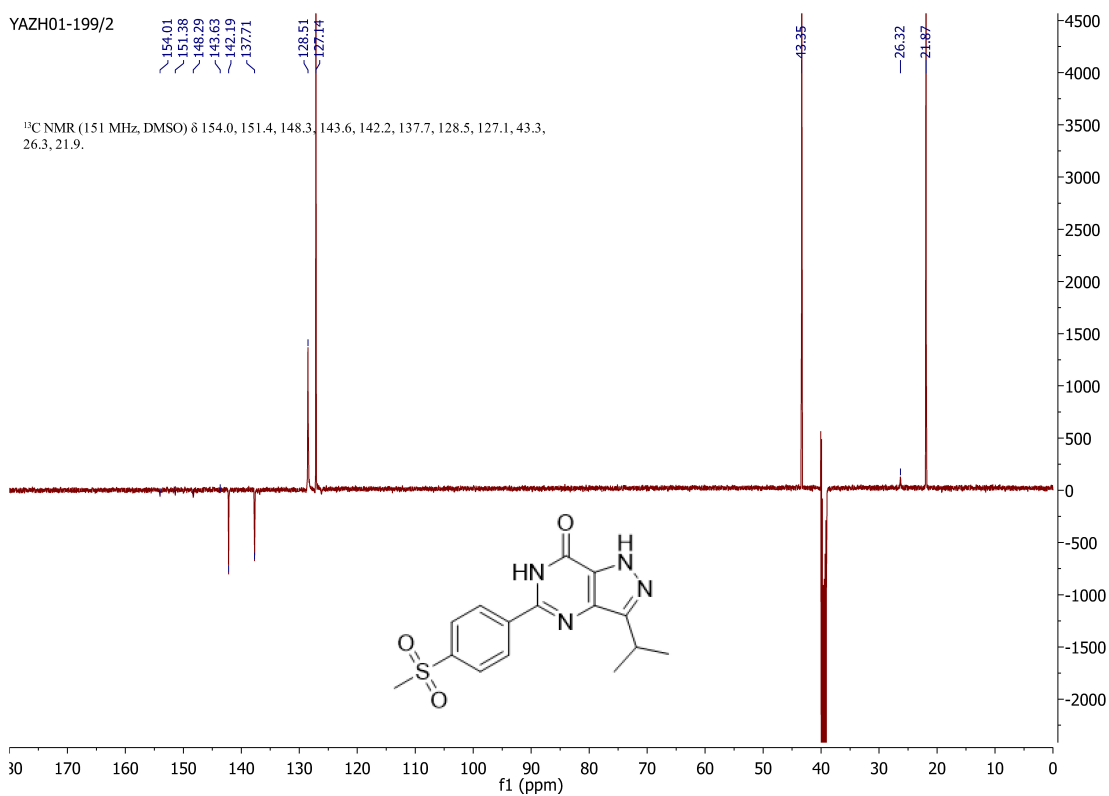

Figure S127.  $^{13}\text{C NMR}$  spectrum of compound **41** (NPD-3376).

Acquired by : Admin  
 Date Acquired : 21/3/2018 5:07:49 PM  
 Sample Name : YAZH01-191-4  
 Sample ID :  
 Tray# : 1  
 Vial# : 20  
 Injection Volume : 10  
 Data File : C:\LabSolutions\Data\2018\2018-wk12\YAZH01-191-4.lcd  
 Background File : blanco 21032018.lcd  
 Method File : Method SCAN ACID standard.lcm  
 Report Format : DefaultLCMS.lcr  
 Tuning File : C:\LabSolutions\Tuning\Tuning-ESI-pos-neg01072015a.lct  
 Processed by : Admin  
 Modified Date : 22/3/2018 2:23:15 PM

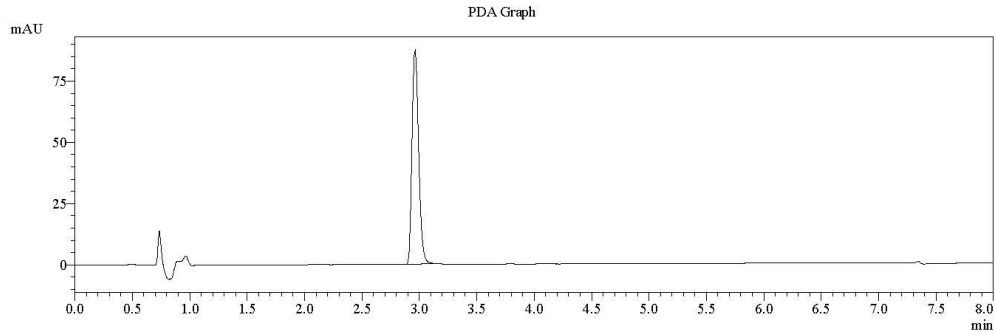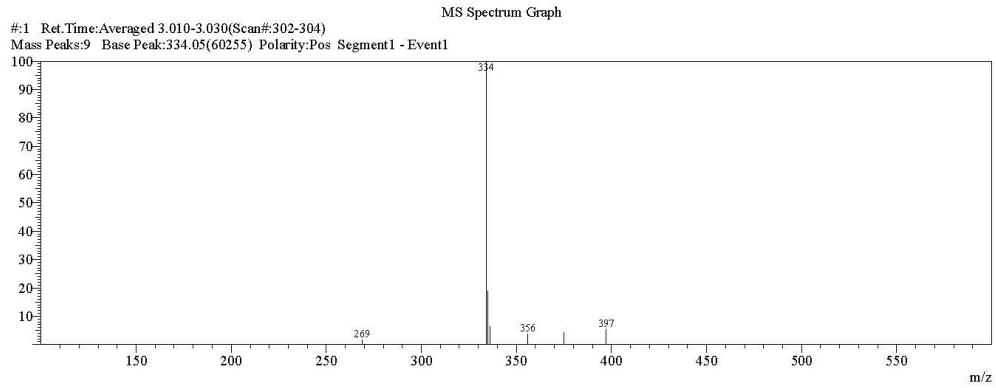

Figure S128. LCMS spectrum of compound **42** (NPD-3372).

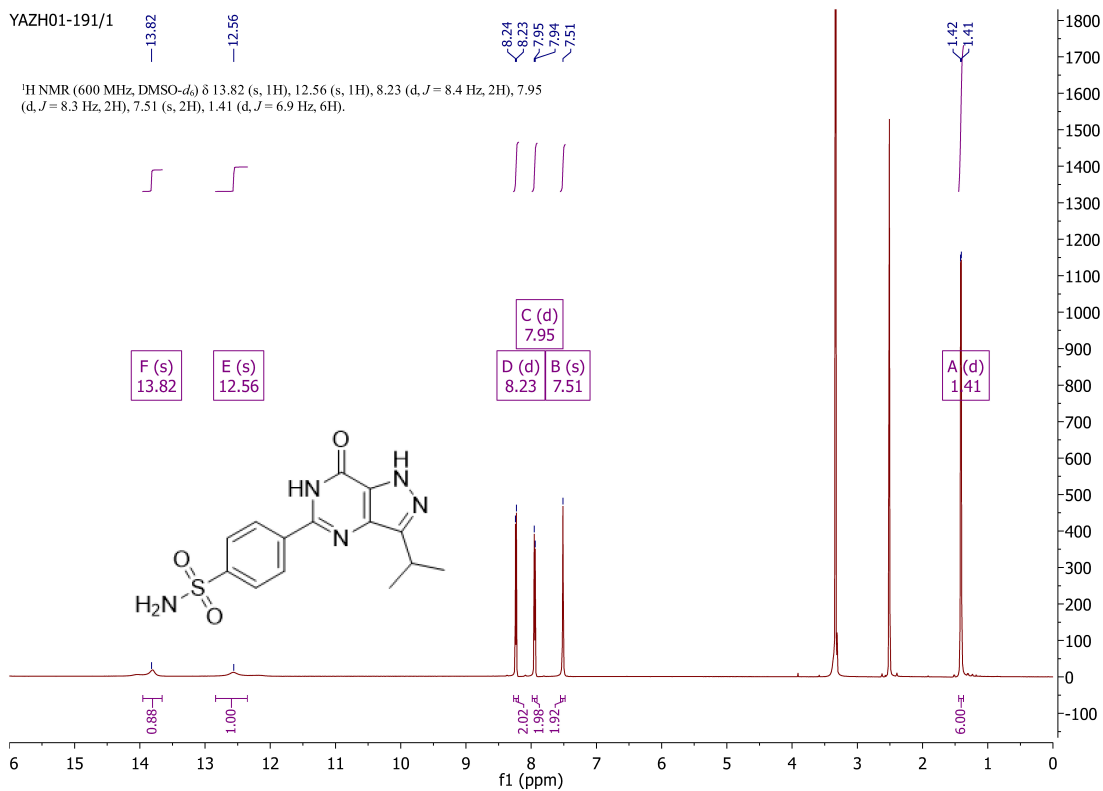

Figure S129. <sup>1</sup>H NMR spectrum of compound **42** (NPD-3372).

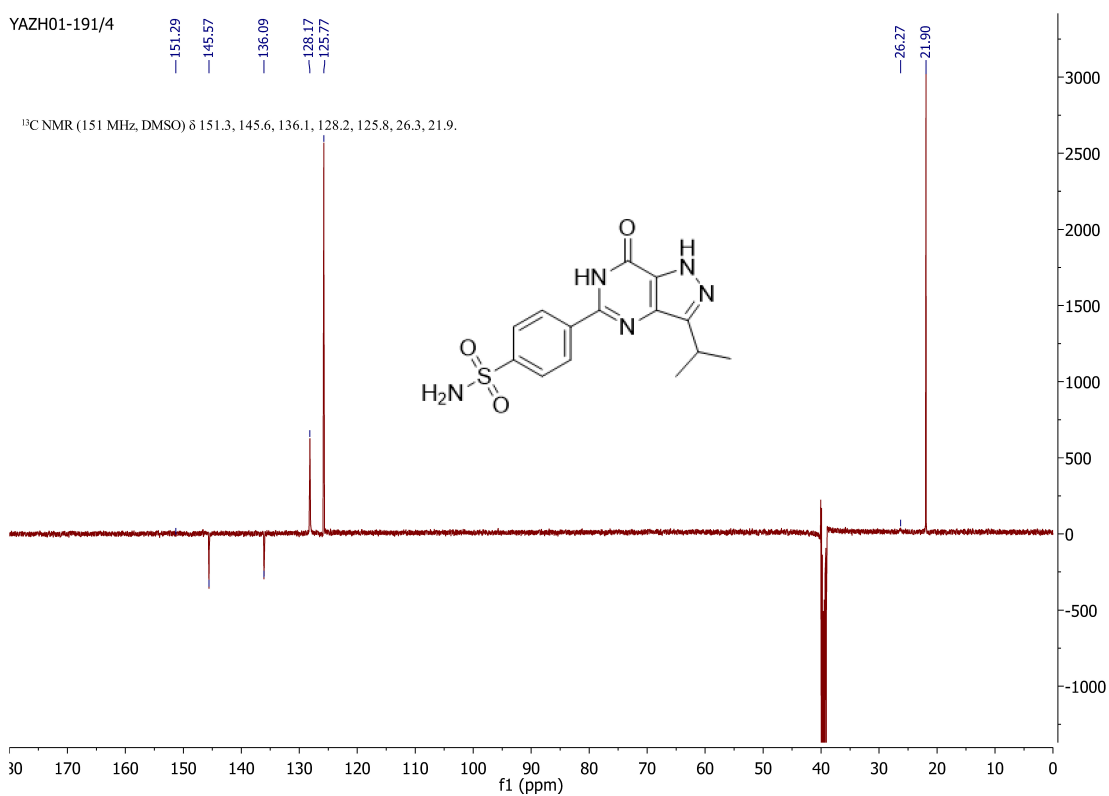

Figure S130. <sup>13</sup>C NMR spectrum of compound **42** (NPD-3372).

Acquired by : Admin  
 Date Acquired : 14/12/2017 10:02:22 AM  
 Sample Name : YAZH01-176-2  
 Sample ID :  
 Tray# : 1  
 Vial# : 9  
 Injection Volume : 4  
 Data File : C:\LabSolutions\Data\2017\2017-wk50\YAZH01-176-2.lcd  
 Background File : blanco 14122017.lcd  
 Method File : Method SCAN ACID standard.lcm  
 Report Format : DefaultLCMS1cr  
 Tuning File : C:\LabSolutions\Tuning\Tuning-ESI-pos-neg01072015a1ct  
 Processed by : Admin  
 Modified Date : 14/12/2017 10:54:42 AM

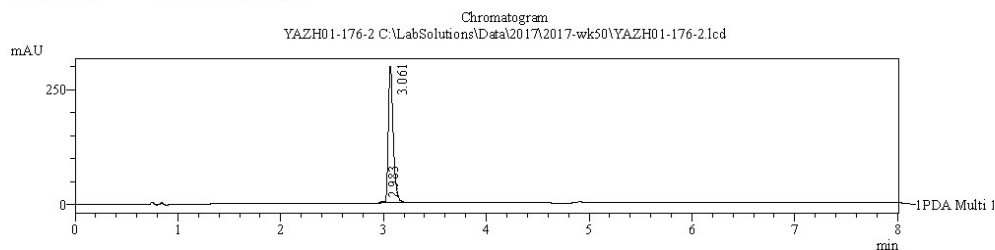

| Peak# | Name | Ret. Time | Area   | Area%  |
|-------|------|-----------|--------|--------|
| 1     |      | 2.983     | 6290   | 0.640  |
| 2     |      | 3.061     | 977114 | 99.360 |

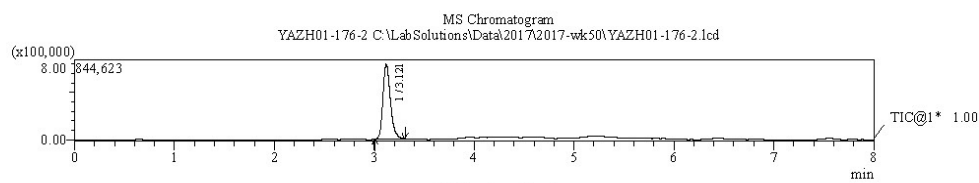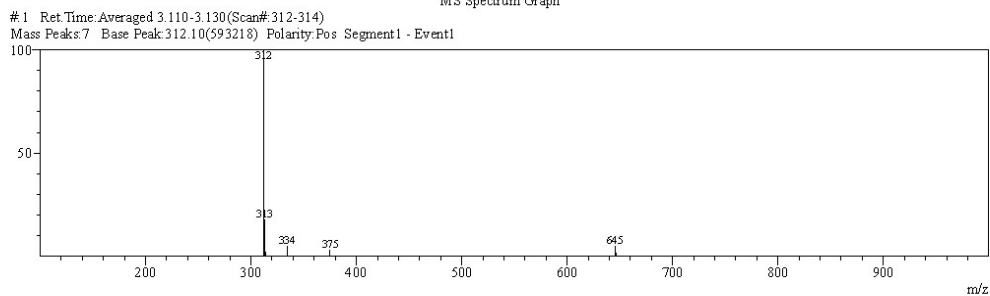

MS Spectrum Table

| # | m/z    | Abs.Inten. | Rel.Inten. | Charge | Polarity | Monoisotopic | # | m/z    | Abs.Inten. | Rel.Inten. | Charge | Polarity | Monoisotopic |
|---|--------|------------|------------|--------|----------|--------------|---|--------|------------|------------|--------|----------|--------------|
| 1 | 312.10 | 593218     | 100.00     |        |          |              | 5 | 375.10 | 18532      | 3.12       |        |          |              |
| 2 | 313.10 | 104168     | 17.56      |        |          |              | 6 | 645.25 | 28444      | 4.79       |        |          |              |
| 3 | 314.05 | 12675      | 2.14       |        |          |              | 7 | 646.25 | 10646      | 1.79       |        |          |              |
| 4 | 334.05 | 27622      | 4.66       |        |          |              |   |        |            |            |        |          |              |

Figure S131. LCMS spectrum of compound **43** (NPD-3280).

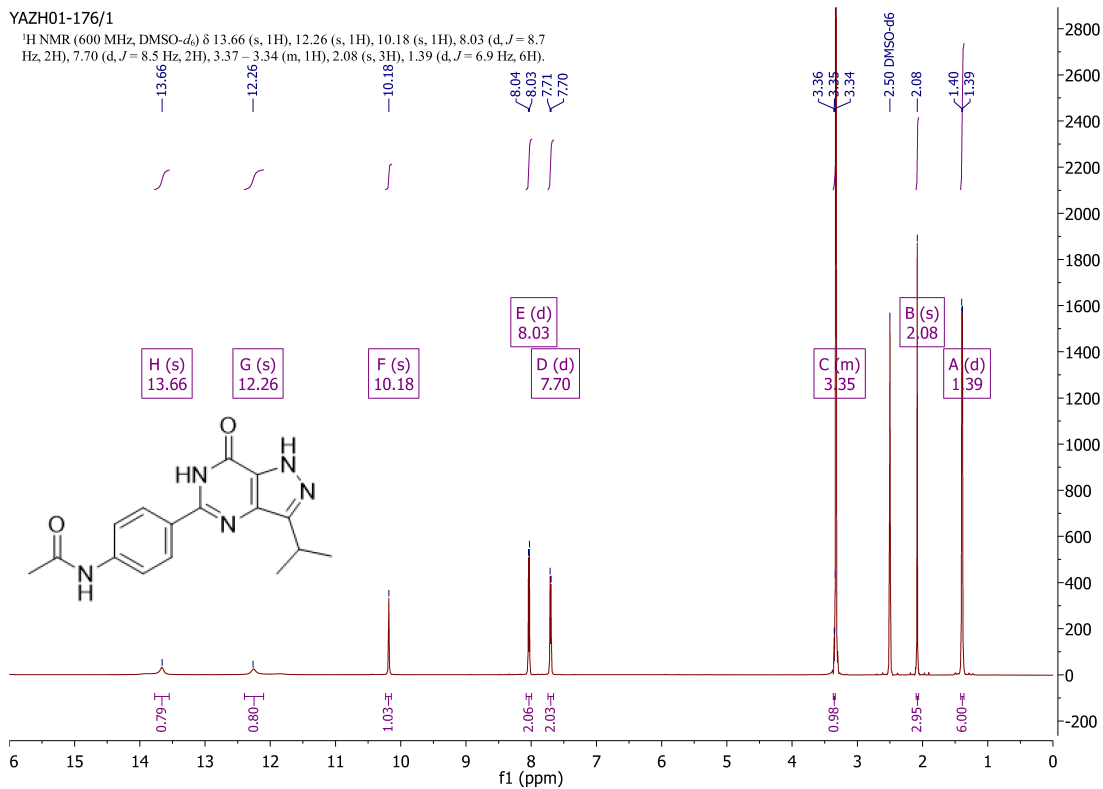

Figure S132. <sup>1</sup>H NMR spectrum of compound **43** (NPD-3280).

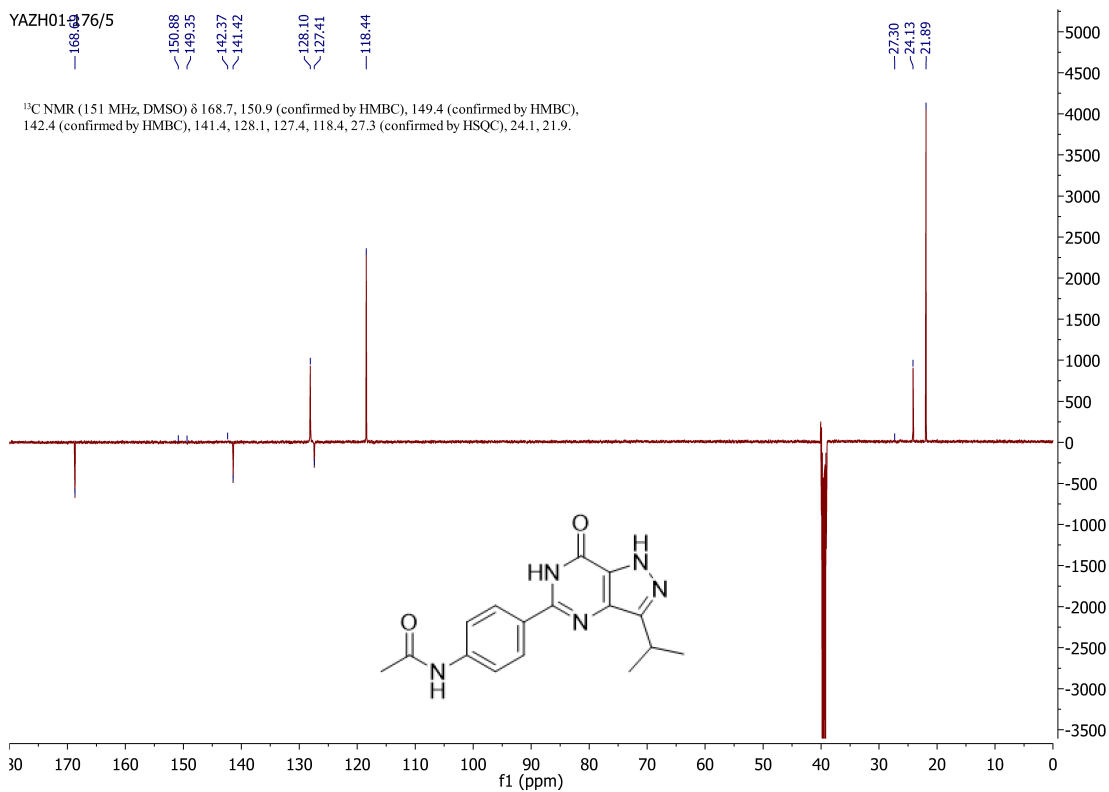

Figure S133. <sup>13</sup>C NMR spectrum of compound **43** (NPD-3280).

Acquired by : Admin  
 Date Acquired : 18/6/2019 3:48:26 PM  
 Sample Name : VUF16503  
 Sample ID :  
 Tray# : 1  
 Vial# : 36  
 Injection Volume : 5  
 Data File : C:\LabSolutions\Data\2019\2019-wk25\VUF16503.lcd  
 Background File : blanco 18062019.lcd  
 Method File : Method SCAN ACID standard.lcm  
 Report Format : DefaultLCMS.lcr  
 Tuning File : C:\LabSolutions\Tuning\Tuning-ESI-pos-neg01072015a.lct  
 Processed by : Admin  
 Modified Date : 18/6/2019 4:24:20 PM

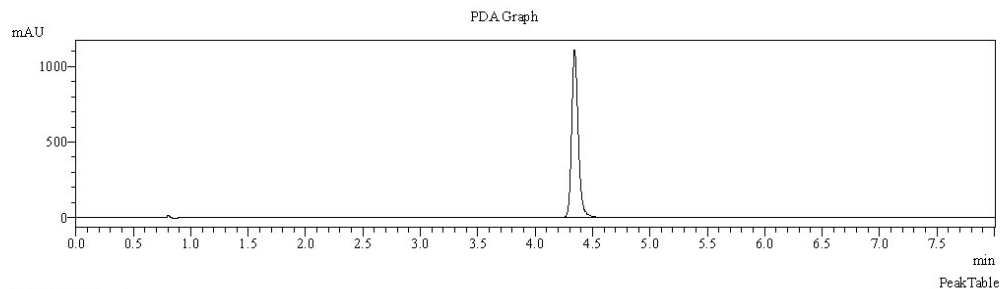

PDA Ch1 254nm 4nm

| Peak# | Name | Ret. Time | Area    | Area%   |
|-------|------|-----------|---------|---------|
| 1     |      | 4.339     | 4313859 | 100.000 |

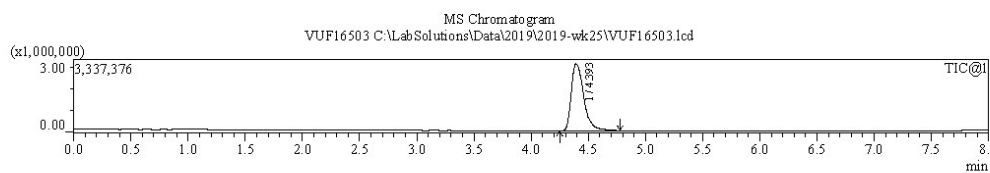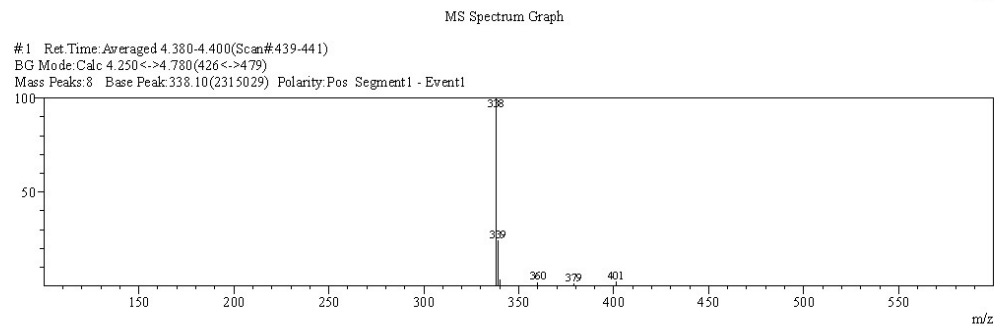

MS Spectrum Table

#1 Ret. Time: Averaged 4.380-4.400(Scan#439-441)  
 BG Mode: Calc 4.250<->4.780(426<->479)  
 Mass Peaks: 8 Base Peak: 338.10(2315029) Polarity: Pos Segment1 - Event1

| # | m/z    | Abs.Inten. | Rel.Inten. | Charge | Polarity | Monoisotopic | # | m/z    | Abs.Inten. | Rel.Inten. | Charge | Polarity | Monoisotopic |
|---|--------|------------|------------|--------|----------|--------------|---|--------|------------|------------|--------|----------|--------------|
| 1 | 338.10 | 2315029    | 100.00     |        |          |              | 5 | 379.15 | 26705      | 1.15       |        |          |              |
| 2 | 339.15 | 558399     | 24.12      |        |          |              | 6 | 401.15 | 51029      | 2.20       |        |          |              |
| 3 | 340.15 | 69830      | 3.02       |        |          |              | 7 | 697.40 | 39606      | 1.71       |        |          |              |
| 4 | 360.05 | 44771      | 1.93       |        |          |              | 8 | 702.95 | 24657      | 1.07       |        |          |              |

Figure S134. LCMS spectrum of compound 44 (NPD-3283).



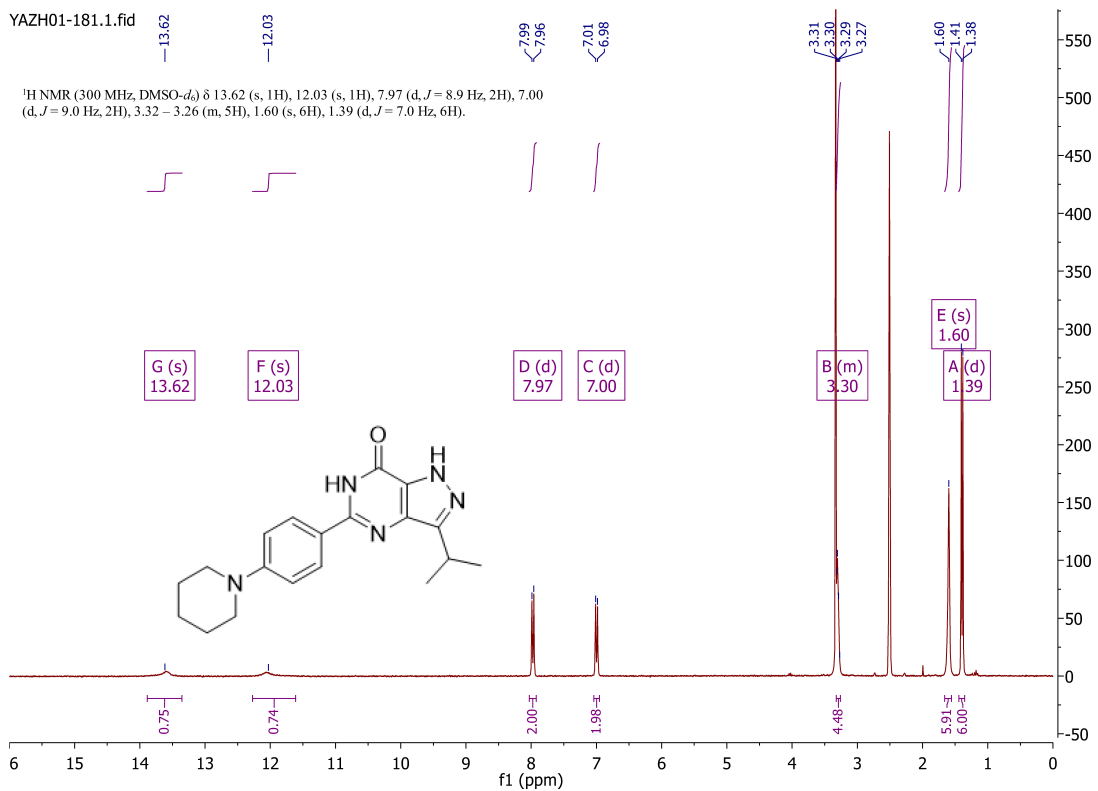

Figure S135.  $^1\text{H NMR}$  spectrum of compound **44** (NPD-3283).

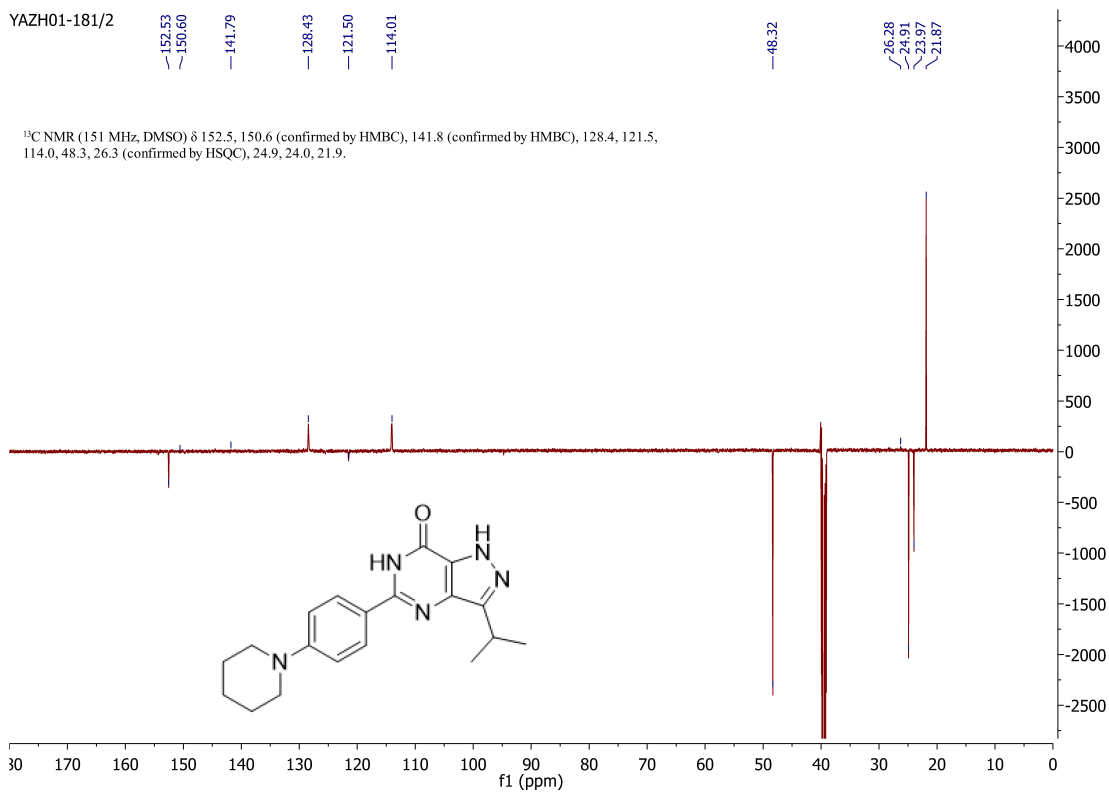

Figure S136.  $^{13}\text{C NMR}$  spectrum of compound **44** (NPD-3283).

Acquired by : Adm  
 Date Acquired : 12/3/2018 11:54:17 AM  
 Sample Name : YAZH01-179  
 Sample ID :  
 Tray# : 1  
 Vial# : 8  
 Injection Volume : 5  
 Data File : C:\LabSolutions\Data\2018\2018-wk11\YAZH01-179.lcd  
 Background File : blanco\_120318.lcd  
 Method File : Method SCAN ACID standard.lcm  
 Report Format : DefaultLCMS.lcr  
 Tuning File : C:\LabSolutions\Tuning\Tuning-ESI-pos-neg01072015a.lct  
 Processed by : Admin  
 Modified Date : 7/6/2019 5:56:39 PM

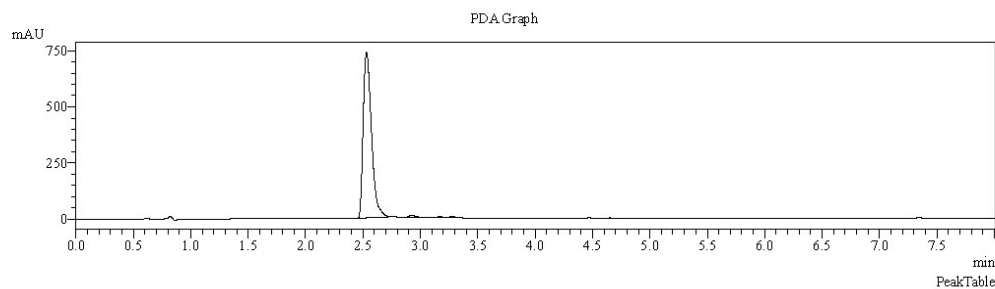

PDA.Ch1 254nm 4nm

| Peak# | Name | Ret. Time | Area    | Area % |
|-------|------|-----------|---------|--------|
| 1     |      | 2.526     | 3685980 | 98.260 |
| 2     |      | 2.922     | 37216   | 0.992  |
| 3     |      | 3.163     | 13353   | 0.356  |
| 4     |      | 3.272     | 14686   | 0.392  |

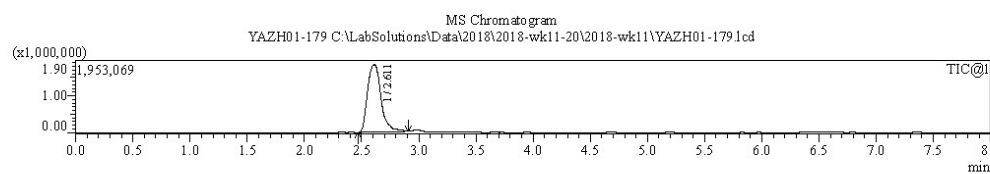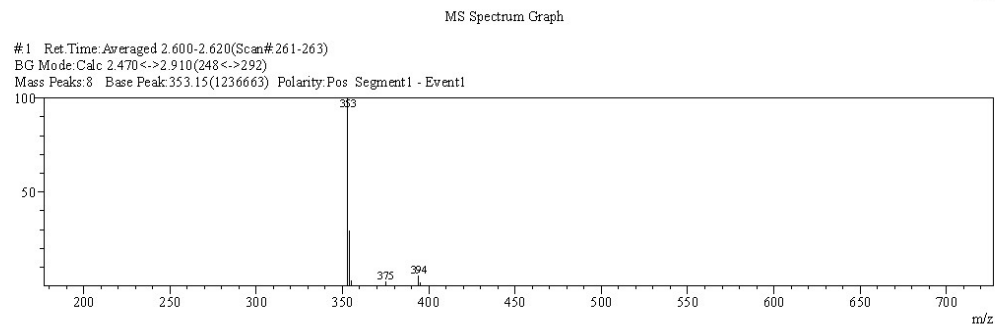

MS Spectrum Table

#1 Ret Time: Averaged 2.600-2.620(Scan# 261-263)  
 BG Mode: Calc 2.470<->2.910(248<->292)  
 Mass Peaks: 8 Base Peak: 353.15(1236663) Polarity: Pos Segment1 - Event1

| # | m/z    | Abs.Inten. | Rel.Inten. | Charge | Polarity | Monoisotopic | # | m/z    | Abs.Inten. | Rel.Inten. | Charge | Polarity | Monoisotopic |
|---|--------|------------|------------|--------|----------|--------------|---|--------|------------|------------|--------|----------|--------------|
| 1 | 176.95 | 20460      | 1.65       |        |          |              | 5 | 375.20 | 26493      | 2.14       |        |          |              |
| 2 | 353.15 | 1236663    | 100.00     |        |          |              | 6 | 394.20 | 66244      | 5.36       |        |          |              |
| 3 | 354.15 | 365052     | 29.52      |        |          |              | 7 | 395.20 | 19763      | 1.60       |        |          |              |
| 4 | 355.15 | 31125      | 2.52       |        |          |              | 8 | 727.35 | 20062      | 1.62       |        |          |              |

Figure S137. LCMS spectrum of compound **45** (NPD-3282).

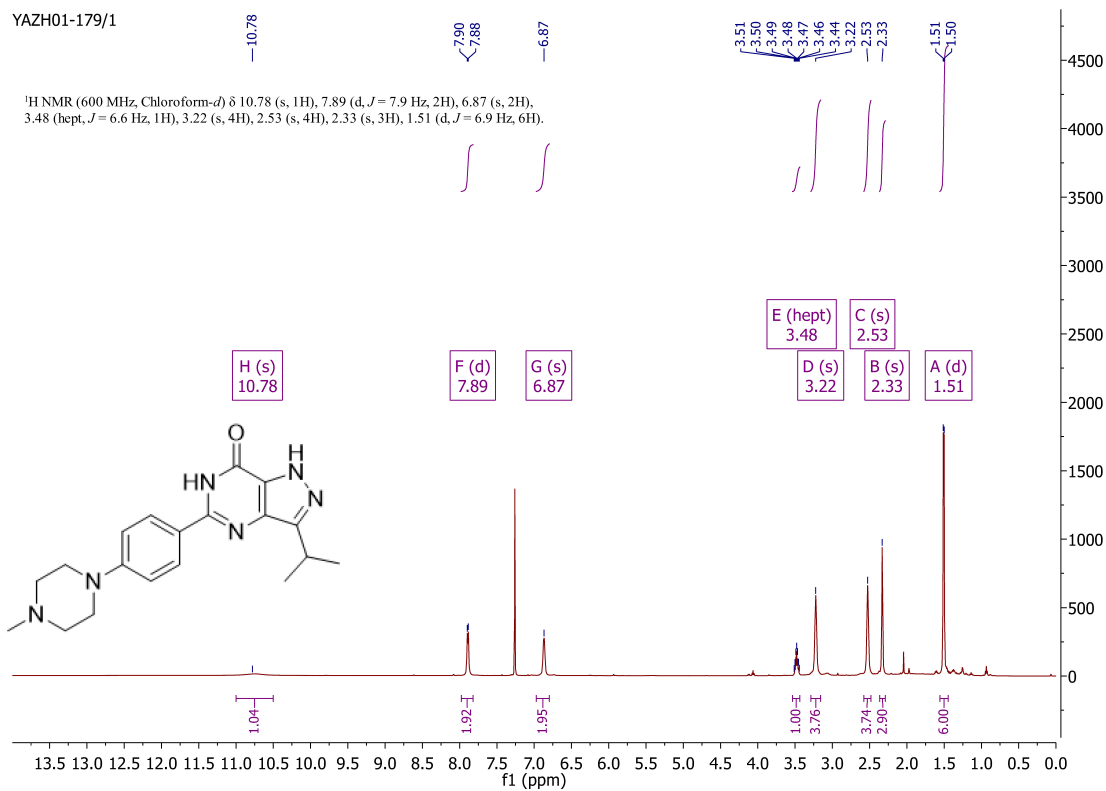

Figure S138. <sup>1</sup>H NMR spectrum of compound 45 (NPD-3282).

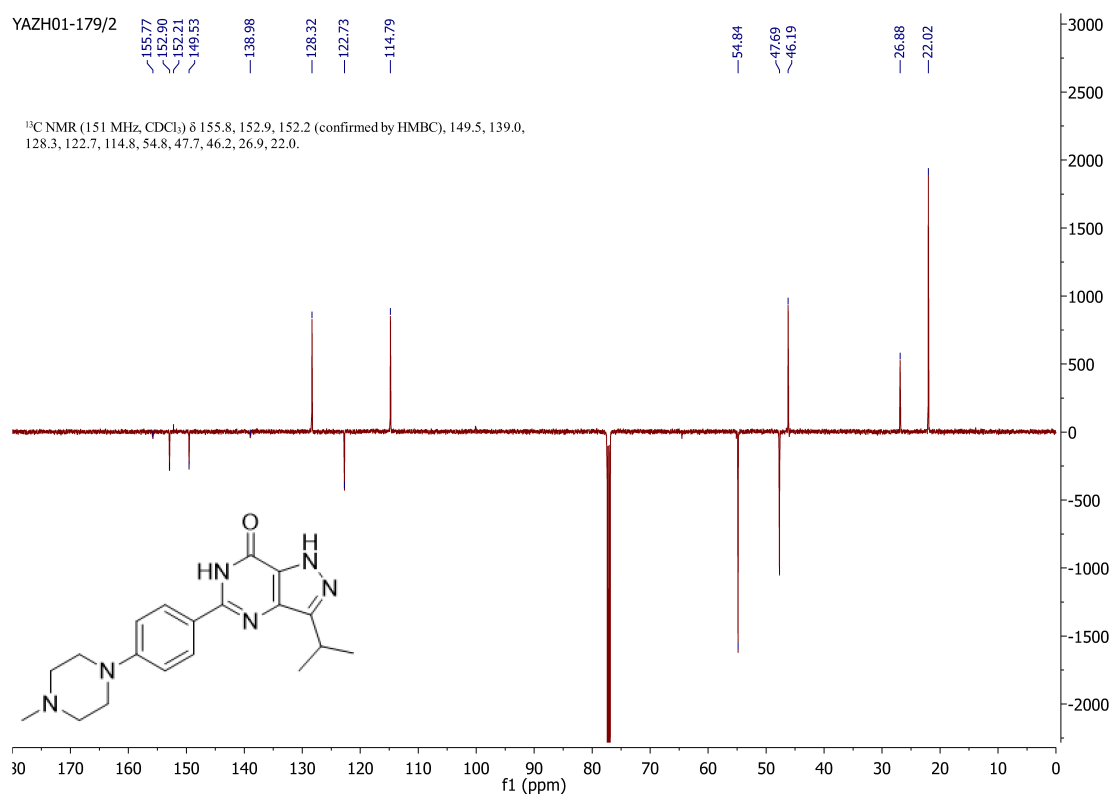

Figure S139. <sup>13</sup>C NMR spectrum of compound 45 (NPD-3282).

Acquired by : Admin  
 Date Acquired : 17/5/2018 4:25:17 PM  
 Sample Name : YAZH01-212\_LCMS  
 Sample ID :  
 Tray# : 1  
 Vial# : 11  
 Injection Volume : 6  
 Data File : C:\LabSolutions\Data\2018\2018-wk20\YAZH01-212\_LCMS-1.lcd  
 Background File : blanco 170518.lcd  
 Method File : Method SCAN ACID standard.lcm  
 Report Format : DefaultL.CMS.lcr  
 Tuning File : C:\LabSolutions\Tuning\Tuning-ESI-pos-neg01072015a.lct  
 Processed by : Admin  
 Modified Date : 17/5/2018 6:30:24 PM

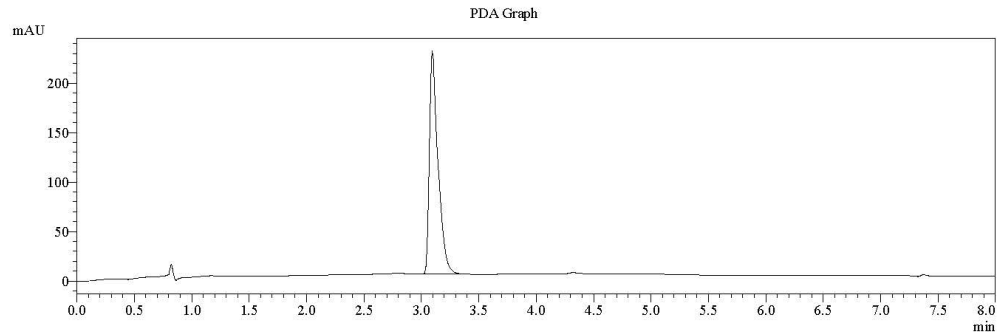

PDA Ch1 254nm 4nm

| Peak# | Name | Ret. Time | Area    | Area%   |
|-------|------|-----------|---------|---------|
| 1     |      | 3.091     | 1176731 | 100.000 |

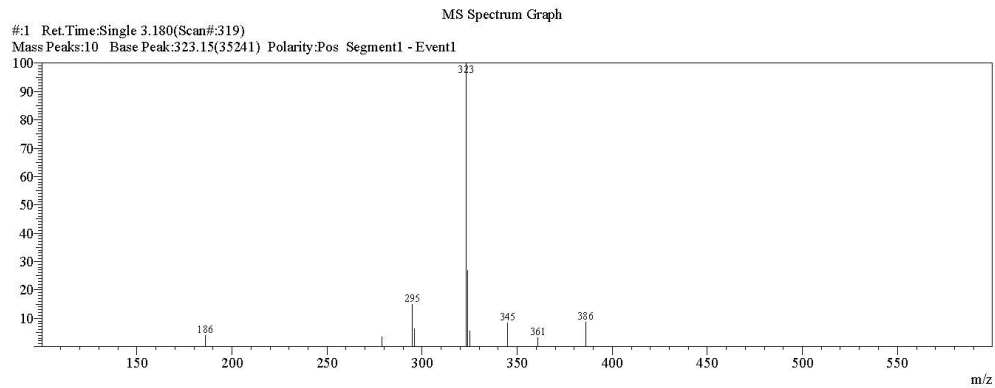

MS Spectrum Table

#1 Ret.Time:  
 BG Mode:None  
 Mass Peaks:10 Base Peak:323.15(35241) Polarity:Pos Segment1 - Event1

| # | m/z    | Abs.Inten. | Rel.Inten. | Charge | Polarity | Monoisotopic | #  | m/z    | Abs.Inten. | Rel.Inten. | Charge | Polarity | Monoisotopic |
|---|--------|------------|------------|--------|----------|--------------|----|--------|------------|------------|--------|----------|--------------|
| 1 | 185.95 | 1430       | 4.06       |        |          |              | 6  | 324.05 | 9489       | 26.93      |        |          |              |
| 2 | 278.85 | 1179       | 3.35       |        |          |              | 7  | 325.05 | 1972       | 5.60       |        |          |              |
| 3 | 294.80 | 5287       | 15.00      |        |          |              | 8  | 345.00 | 2941       | 8.35       |        |          |              |
| 4 | 295.80 | 2225       | 6.31       |        |          |              | 9  | 360.95 | 1155       | 3.28       |        |          |              |
| 5 | 323.15 | 35241      | 100.00     |        |          |              | 10 | 385.95 | 3045       | 8.64       |        |          |              |

Figure S140. LCMS spectrum of compound **46** (NPD-3490).

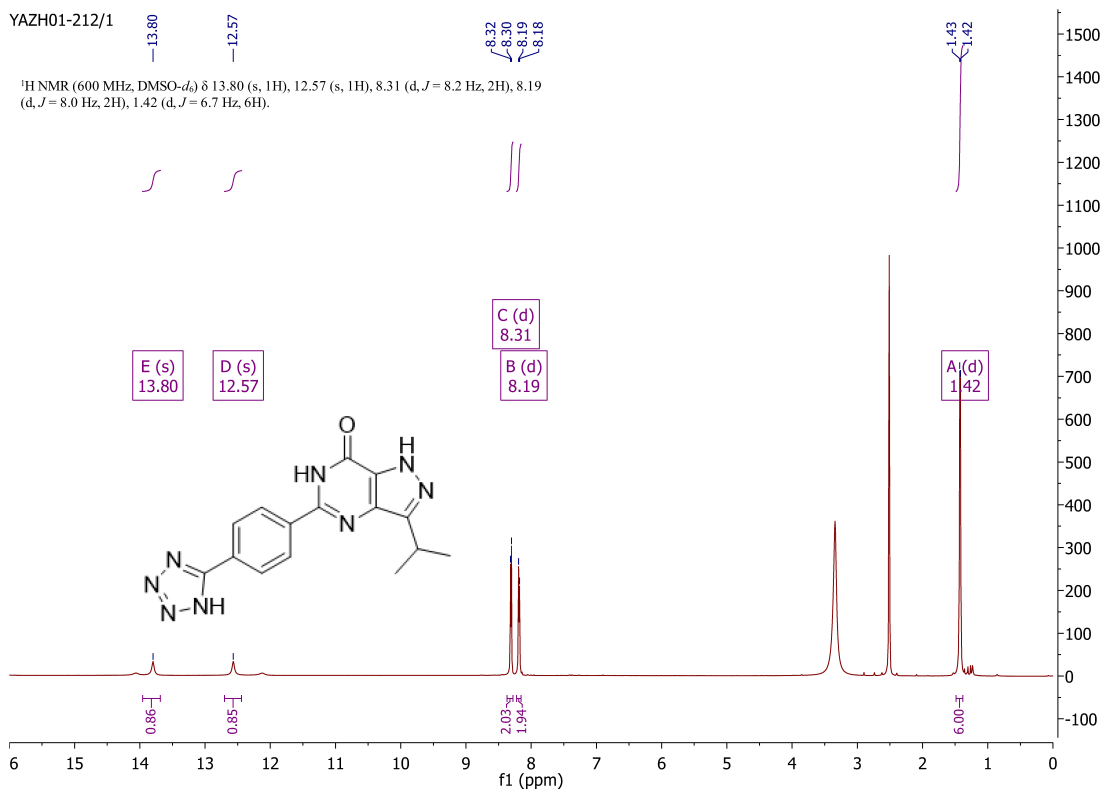

Figure S141.  $^1\text{H NMR}$  spectrum of compound **46** (NPD-3490).

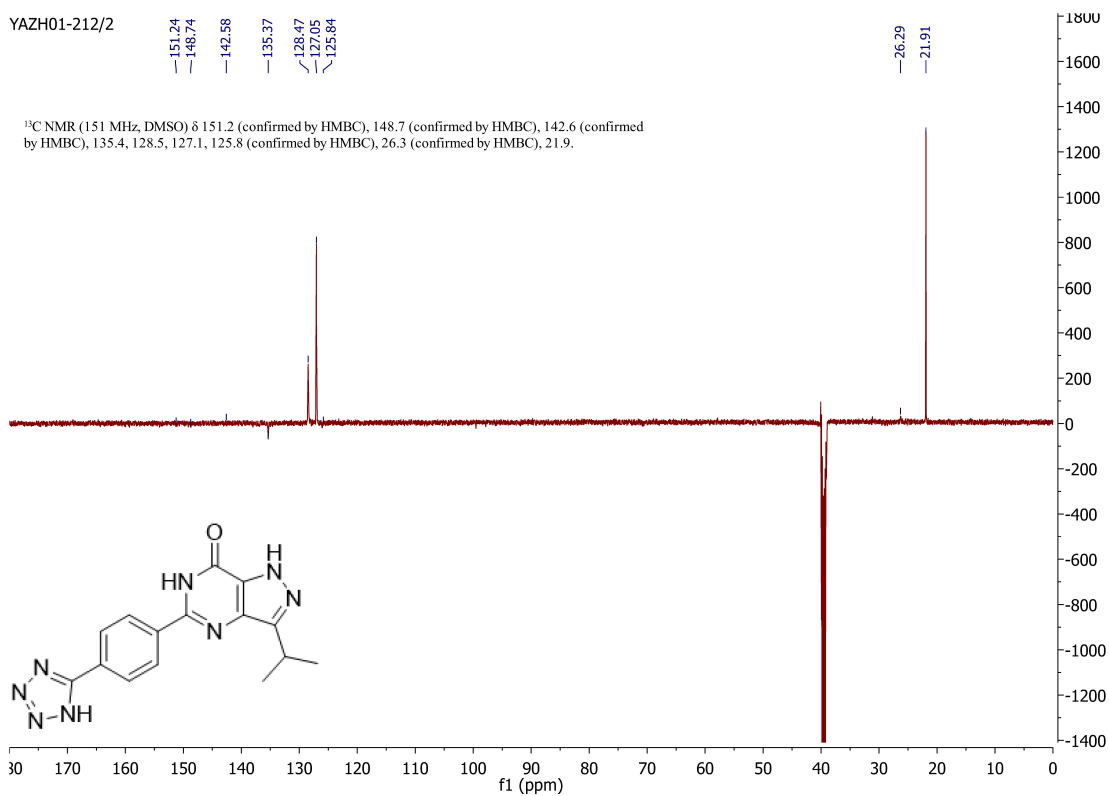

Figure S142.  $^{13}\text{C NMR}$  spectrum of compound **46** (NPD-3490).
